# Supplementary material for: ER-to-lysosome Ca2+ refilling followed by K+ efflux-coupled store-operated Ca2+ entry in inflammasome activation and metabolic inflammation
Source: eLife journal article supplement (doi:10.7554/elife.87561), 2023-09-14
Supplement: fig1-data2 [file elife-87561-fig1-data2-v1.pdf]

**Figure. 1E**

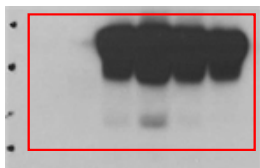

**IL-1 $\beta$**
