# Supplementary material for: ER-to-lysosome Ca2+ refilling followed by K+ efflux-coupled store-operated Ca2+ entry in inflammasome activation and metabolic inflammation
Source: eLife journal article supplement (doi:10.7554/elife.87561), 2023-09-14

Figure. 6E

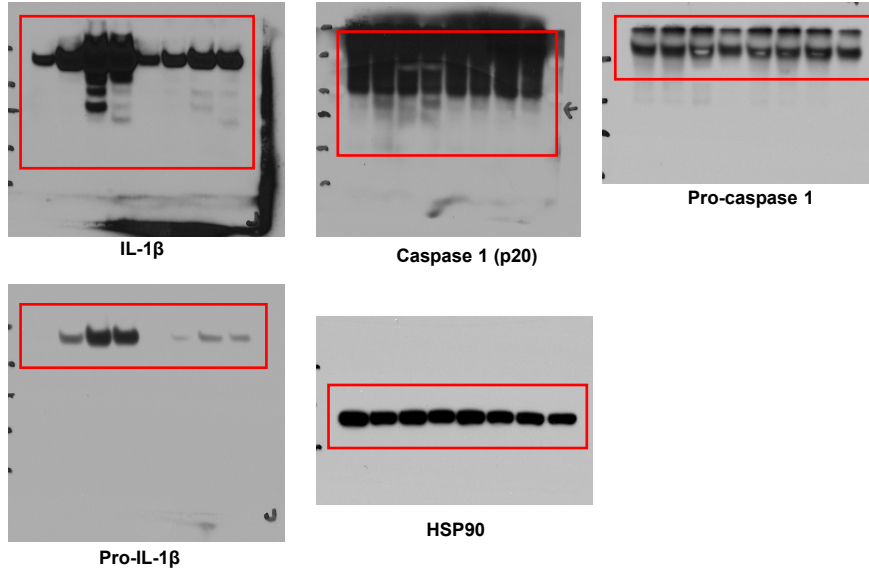

Figure. 6H

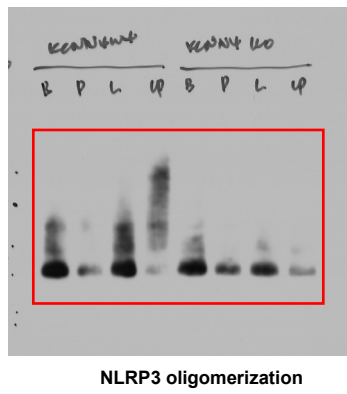

Figure. 6I

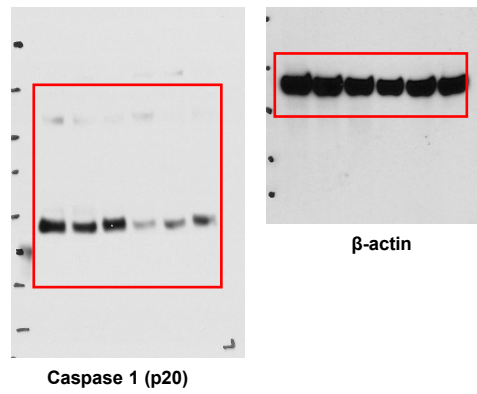

Supplement: fig6-data2 [file elife-87561-fig6-data2-v1.pdf]
