# Supplementary material for: ER-to-lysosome Ca2+ refilling followed by K+ efflux-coupled store-operated Ca2+ entry in inflammasome activation and metabolic inflammation
Source: eLife journal article supplement (doi:10.7554/elife.87561), 2023-09-14
Supplement: fig6-figsupp1-data2 [file elife-87561-fig6-figsupp1-data2-v1.pdf]

Figure 6-figure supplement 1F

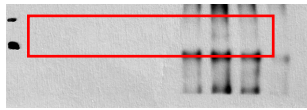

NLRP3

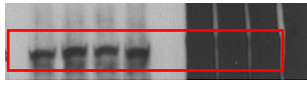

NLRP3 (long exp.)

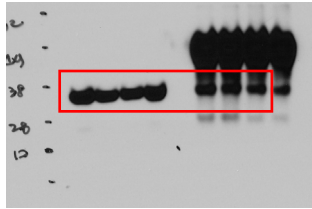

NEK7

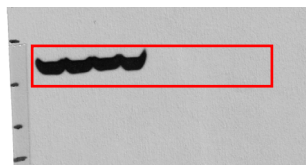

$\beta$ -actin

Figure 6-figure supplement 1G

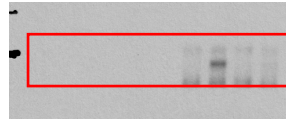

NLRP3

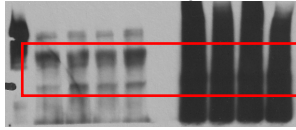

NLRP3 (long exp.)

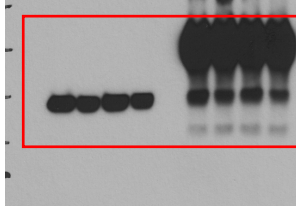

NEK7

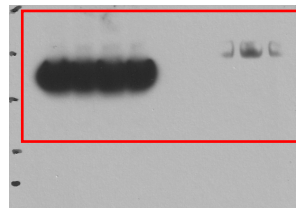

$\beta$ -actin
