# Supplementary material for: ER-to-lysosome Ca2+ refilling followed by K+ efflux-coupled store-operated Ca2+ entry in inflammasome activation and metabolic inflammation
Source: eLife journal article supplement (doi:10.7554/elife.87561), 2023-09-14

Figure. 7A

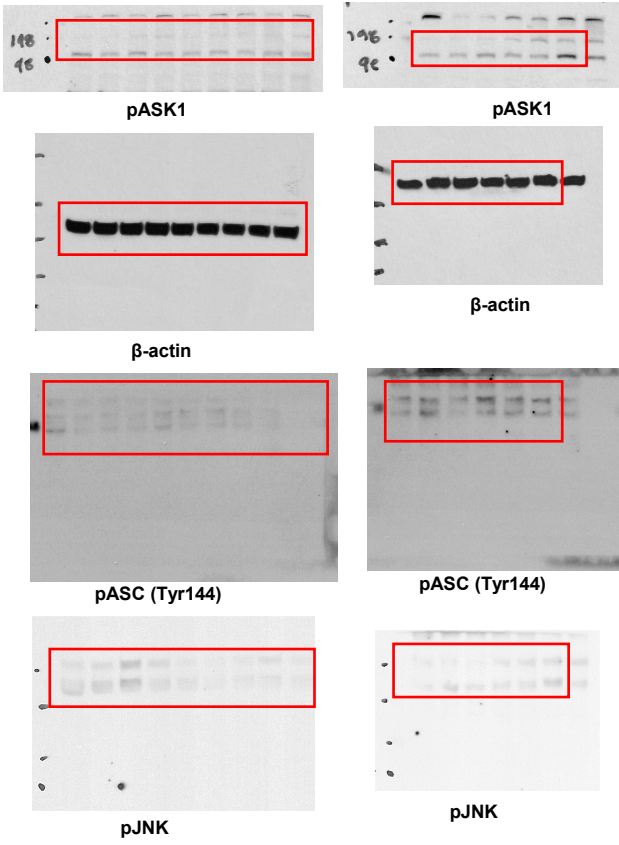

Figure. 7B

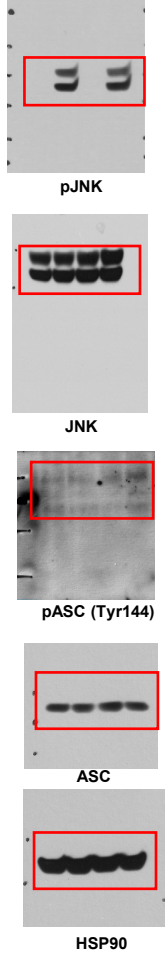

Figure. 7C

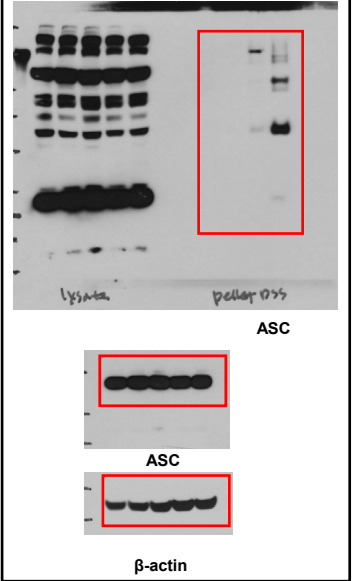

Figure. 7D

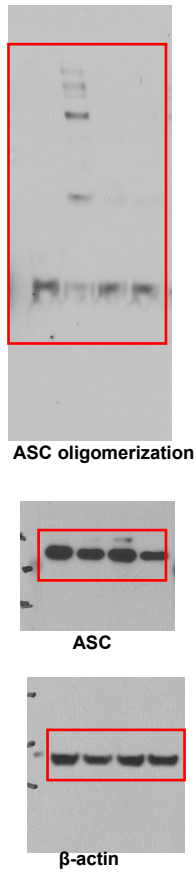

Figure. 7F

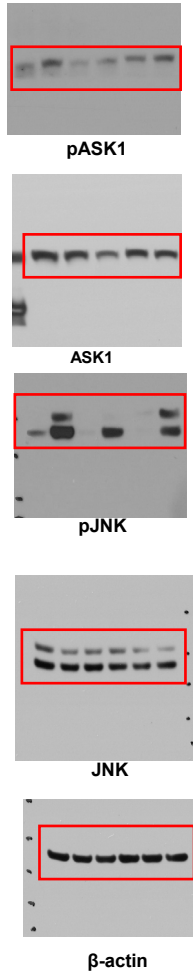

Figure. 7G

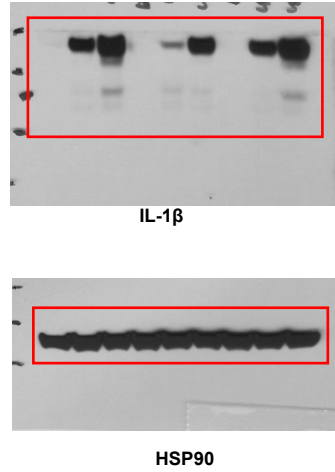

Supplement: fig7-data2 [file elife-87561-fig7-data2-v1.pdf]
