# Supplementary material for: ER-to-lysosome Ca2+ refilling followed by K+ efflux-coupled store-operated Ca2+ entry in inflammasome activation and metabolic inflammation
Source: eLife journal article supplement (doi:10.7554/elife.87561), 2023-09-14

Figure 7-figure supplement 1B upper

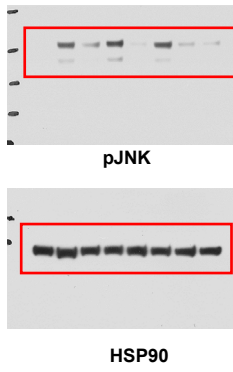

Figure 7-figure supplement 1B lower

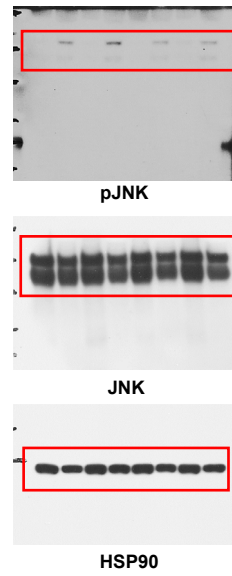

Figure 7-figure supplement 1C

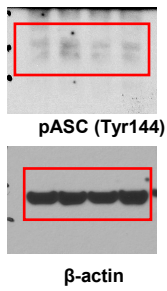

Figure 7-figure supplement 1E

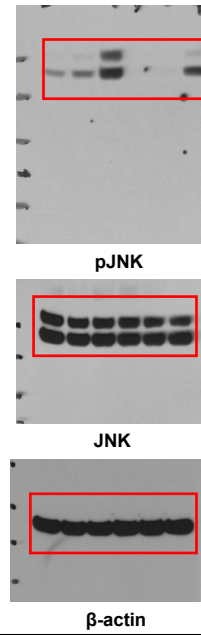

Supplement: fig7-figsupp1-data2 [file elife-87561-fig7-figsupp1-data2-v1.pdf]
