# Supplementary material for: ER-to-lysosome Ca2+ refilling followed by K+ efflux-coupled store-operated Ca2+ entry in inflammasome activation and metabolic inflammation
Source: eLife. 2024 Jul 2;12:RP87561. doi: 10.7554/eLife.87561 (PMC11219040; doi:10.7554/eLife.87561)
Supplement: Figure 1—figure supplement 1—source data 1. [file elife-87561-fig1-figsupp1-data1.xlsx]

## Sheet: Fig.S1a
Figure-figure supplement 1A
BSA	LPS	PA	L+P
1.23377	17.2415	3.16874	15.0132
0.353127	9.34669	3.29871	24.2522
0.54184	7.03521	3.72469	16.4709
0.676201	4.36088	3.37785	24.9524
0.540581	3.63602	1.45864	19.7922

## Sheet: Fig.S1b
Figure-figure supplement 1B
	DMSO			NAC
BSA	0	0	0	0	0	0
PA	0	0	0	0	0	0
LPS	100.791	160.884	130.837	118.884	125.256	122.07
L+P	379.535	393.767	386.651	265.256	271.954	268.605

## Sheet: Fig.S1c
Figure-figure supplement 1C
	Fluo-3 left							Fura2 right
	BSA	LPS	L+P	L+P:NAC				BSA	L+P	L+P:BAPTA-AM	L+P:NAC
	2.71274	2.76268	9.6603	2.57934				27.1161	65.6795	17.0452	29.5738
	2.60859	1.65478	4.79512	1.61806				32.3996	66.9237	21.2866	25.1032
	1.22057	2.51118	4.09864	3.89485				35.2679	67.9762	20.3684	24.2947
	1.02995	1.04393	3.36854	1.56716				19.7729	68.6075	7.86242	26.3809
	1.58096	1.27496	11.3106	2.38593				30.2486	69.8402	26.067	17.457
	1.11348	1.91224	6.3271	1.52811				22.7234	70.2976	15.5289	25.7297
	1.04546	1.65478	2.87344	0.949948				33.6447	66.9886	22.1657	27.2348
	0.889604	2.05366	2.40885	2.82193				20.5145	71.9414	22.0953	21.9546
	1.2462	1.15813	2.96023	1.89391				34.356	72.7688	24.8906	19.6795
	1.21847	1.34633	2.43218	1.99217				33.0849	73.0844	9.52829	27.8704
	1.51886	1.75082	7.4142	2.30489				29.2755	73.4463	17.6312	31.0143
	1.45953	1.56343	5.59443	4.48164				15.6734	72.506	18.1424	31.2239
	1.31311		4.86523	1.85773				23.8116	75.0552	17.225	18.34
			1.74585	1.60851				23.5466	73.0515	35.28	18.4273
			6.47352	1.2329				33.7712	70.0884	40.7981	20.1289
			1.84139	3.0333				29.7528	75.4253	37.6929	21.07
			11.1552	1.72758				36.873	58.9668	42.0794	15.9509
			7.96556					34.5069	71.5413	41.6008	21.4447
			3.52248					28.1855	74.2764	40.2658	28.5188
			4.42735						65.0845	37.7294	24.0649
			6.17476						65.6277	41.3984	22.8938
			1.62						68.7052	38.3804
			3.52248						68.3145	40.1845
			4.42735						76.5108	40.1967
			6.17476						65.3108	39.772
			1.62						69.5464	39.0845
									62.4681	39.6031
									67.7811
									71.0041

## Sheet: Fig.S1d
Figure-figure supplement 1D
BSA	PA	L+P	L+P:MitoTEMPOL
12	9.94	20.1	15.2
8.97	11	18.1	14.9
10.485	10.47	19.1	14.4
