# Supplementary material for: ER-to-lysosome Ca2+ refilling followed by K+ efflux-coupled store-operated Ca2+ entry in inflammasome activation and metabolic inflammation
Source: eLife. 2024 Jul 2;12:RP87561. doi: 10.7554/eLife.87561 (PMC11219040; doi:10.7554/eLife.87561)
Supplement: Figure 1—source data 1. [file elife-87561-fig1-data1.xlsx]

## Sheet: Fig. 1a
Figure 1A
left														right
Time [s]	BSA						L+P							BSA	L+P
0	3.29185	3.86221	3.78073	4.73184	3.09452	2.91497	4.51738	5.36832	5.59347	3.91426	3.68949	5.40654		10.9596	5.57156
4.945	3.2845	3.69231	3.57081	4.65587	3.41231	2.9541	4.00117	5.50329	5.41327	3.89449	3.97094	5.24028		19.5303	6.79258
9.944	3.18453	3.59741	4.37958	4.41401	3.36244	2.8412	4.27376	5.5973	5.69954	3.66029	4.1822	5.48677		9.30543	8.23769
14.946	3.24386	3.63194	4.10628	4.62701	3.07915	3.11195	4.28661	5.70801	5.23682	3.85264	3.97773	5.17705		12.842	6.25272
19.945	3.2776	3.87141	3.96927	4.62947	3.13092	2.96703	4.54727	5.19821	5.40088	3.85998	4.03209	5.26594		15.7034	9.03704
24.945	3.19015	3.75645	3.92371	4.49179	3.43137	2.88323	4.47638	5.60704	5.58717	3.88241	4.35379	5.46101		15.8622	6.15983
29.946	3.37294	3.85458	4.27446	4.60245	3.1106	2.94659	4.13301	5.16667	5.92462	4.08725	4.18506	5.16963
34.945	3.47812	3.54852	4.14179	4.60909	3.12967	2.86823	4.25064	5.84954	5.41373	3.98938	4.0333	5.2527
39.947	3.2306	3.56561	4.44619	4.56883	3.37975	2.7989	4.38693	6.08621	5.50401	4.0123	4.10199	5.16266
44.946	3.42145	3.64191	4.36104	4.51753	3.25389	2.74932	4.36722	5.6033	5.52665	3.86397	4.03482	5.04016
49.945	3.42136	3.63563	4.4912	4.6804	3.16816	2.92636	4.08085	5.23481	5.43304	3.91313	4.53692	4.89465
54.947	3.39819	3.92749	4.24165	4.57181	3.08707	2.78739	4.23321	5.50096	5.54091	3.79351	4.19172	4.81668
59.946	3.55387	3.99335	5.3325	5.74091	3.99583	3.3994	4.39523	5.25783	5.27592	4.0564	4.65325	4.50479
64.945	4.50502	5.20502	7.77736	7.23308	5.32853	4.33501	3.85809	5.15901	5.58116	4.63622	5.05313	4.20358
69.946	5.08382	6.2488	8.13487	8.36081	6.17275	5.19317	3.96797	4.79869	6.34127	5.05447	6.23216	4.01453
74.946	5.55254	7.07748	8.92818	8.82493	6.70401	5.62615	4.01154	5.07264	6.30539	5.74849	6.61556	4.4614
79.944	5.46788	7.18154	9.30543	8.83154	6.85011	5.75887	4.32401	5.30867	7.02948	5.91781	6.75796	4.92228
84.947	5.91028	8.75139	8.61642	8.61056	7.82568	5.72474	4.53427	5.86787	7.09143	5.5617	7.947	5.5288
89.946	5.54581	10.7324	8.58573	7.87293	7.95516	7.06667	4.90472	5.9042	7.61894	6.13741	8.16685	5.51407
94.944	5.92029	12.1725	8.73047	7.82706	9.1261	9.48407	5.01966	6.16867	8.23769	6.25272	8.48394	5.8998
99.947	6.59909	14.4879	7.96548	7.93825	10.0356	10.7734	5.32511	6.99384	7.69177	5.82556	8.26863	5.6854
104.945	7.76787	15.6982	8.61669	8.03309	11.6878	10.9587	5.45918	6.52707	7.9085	6.08215	9.03704	6.15983
109.948	8.8342	18.0306	7.68094	7.72145	11.3306	11.3612	5.57156	6.7655	7.9375	6.03134	8.06504	5.79521
114.946	9.57079	18.4788	8.02188	7.89681	12.6154	12.0415	5.40309	6.68389	7.96258	5.84828	8.73275	5.58123
119.945	10.1887	18.8836	7.75895	8.26704	12.7299	11.7149	5.30565	6.68178	7.4536	6.08209	7.46206	5.57415
124.947	10.0533	18.3847	7.75329	8.38149	14.1011	12.3028	5.47378	6.79258	7.35344	5.84096	7.97187	5.4693
129.946	10.9344	19.5303	7.04361	8.21757	14.7701	13.1322	5.60454	6.64585	7.89381	5.75764	7.07123	5.39762
134.944	10.9596	18.9096	6.96205	8.40559	15.2927	14.3115	5.45488	6.67194	7.13697	5.77746	7.40363	5.1436
139.947	10.3742	17.8791	6.51874	8.81116	14.8388	14.6545	5.18684	6.52396	7.33674	5.50914	6.60168	5.16095
144.945	10.2211	17.2087	6.75	9.28733	15.7034	14.1324	5.24449	6.19474	6.66644	5.23035	6.84283	5.07798
149.945	9.87616	16.8766	6.25948	11.4686	15.5183	14.1002	4.8786	6.09174	7.10015	5.03408	6.1819	4.50364
154.947	9.58881	16.6728	6.24975	11.6155	14.663	15.8622	5.02166	6.17355	6.65157	4.85658	5.89203	4.40073
159.946	9.15	16.7389	6.20316	12.5232	13.291	15.3808	4.813	5.80778	7.0162	4.46135	5.75356	4.46237
164.948	9.06326	15.5563	5.82347	12.842	13.1539	14.9357	4.62478	5.76963	6.81765	4.37462	5.59643	4.23937
169.946	8.11504	15.4294	5.38387	12.391	13.4215	13.9773	4.45741	5.31108	6.69925	4.49872	5.58394	4.22753
174.946	7.81369	13.748	5.54442	11.5437	11.7302	13.9888	4.47213	5.53002	6.24736	4.33994	5.52368	3.83353
179.947	7.14801	13.6504	5.37995	11.6748	10.2799	13.2122	4.4576	5.36865	5.92308	3.9327	5.18878	3.82614
184.947	7.09965	12.7674	5.19573	10.8718	10.2592	12.842	4.36387	5.39881	5.98023	3.63402	5.16275	3.70469
189.945	6.38119	12.6311	5.26234	9.9912	10.032	12.4484	4.04095	5.0103	5.91176	3.93568	4.79496	3.46643
194.944	5.87814	10.6066	4.85151	9.60617	8.82439	11.9789	4.00668	5.12482	5.80968	3.65863	4.79051	3.40545
199.946	5.5586	10.3913	4.95734	9.21687	7.56077	11.8913	3.82619	4.95772	5.86867	3.61146	4.6222	3.22674
204.945	4.94912	9.62689	4.73417	9.5727	7.39651	11.9866	3.74693	4.64257	5.79416	3.41695	4.11954	3.20953
209.947	4.63147	8.65986	4.73242	8.73054	6.51102	10.3261	3.66375	4.58696	5.32727	3.41263	4.22727	2.94668
214.946	4.20145	7.83103	4.89405	8.59719	6.53428	11.5701	3.66986	4.43863	5.45233	3.26818	4.15491	2.89723
219.944	3.90615	7.24397	4.7201	8.18525	5.80855	10.5616	3.38379	4.44191	5.25175	3.10114	3.65717	2.90893
224.947	3.63132	6.84501	4.7083	7.32331	5.17339	9.92587	3.37451	4.47471	5.4101	2.90781	3.73539	2.7333
229.946	3.72886	6.28848	4.37948	7.09276	4.66667	9.80204	3.25264	4.28544	5.30703	2.92813	3.57747	2.82374
234.944	3.56661	6.02479	4.04931	7.03573	4.83085	9.69956	3.20391	4.18798	5.26496	2.94807	3.32986	2.64118
239.947	3.48997	5.26391	4.37822	6.81876	4.50829	9.17012	3.01929	4.22985	4.98025	2.96727	3.25623	2.51867
244.945	3.23763	5.02999	3.98243	6.18434	4.1488	8.99726	2.8557	3.99306	4.86461	2.876	3.00462	2.39444
249.948	3.07965	5.01891	3.96695	6.14124	4.07502	8.94505	2.98924	4.06519	4.88572	2.7588	3.33276	2.4197
254.946	3.10399	4.77087	4.07534	6.20673	3.88496	8.81181	2.7505	3.88153	4.86196	2.71271	3.10793	2.2113
259.946	2.8434	4.51174	4.00549	5.77828	3.52758	8.49017	2.96746	3.85113	4.49265	2.68374	2.9321	2.24423
264.947	2.75853	4.223	3.67125	5.5462	3.34349	8.37355	2.75414	3.81296	4.43813	2.4995	2.86858	2.09779
269.946	2.77911	3.95319	3.83133	5.37534	3.15982	8.08895	2.57794	3.85181	4.69383	2.44209	2.78352	2.24766
274.945	2.5525	3.64687	3.8923	5.18596	2.97128	8.27914	2.62122	3.86426	4.76381	2.30962	2.92706	1.99783
279.944	2.63847	3.68575	3.62044	5.08923	3.0463	7.83513	2.54951	3.39428	4.45949	2.34735	2.66151	1.99056
284.946	2.57037	3.42466	3.43584	4.92709	2.76794	7.64186	2.58464	3.46443	4.3149	2.23964	2.51466	1.99325
289.945	2.46298	3.31165	3.49287	5	2.98401	7.6962	2.45885	3.43836	4.19965	2.29818	2.47433	1.85458
294.944	2.3428	3.31543	3.47212	4.70359	2.72714	7.11546	2.48873	3.45191	4.04533	2.12078	2.56627	1.81209
299.946	2.2667	3.13858	3.42918	4.97321	2.70441	7.15138	2.34282	3.38763	4.20875	2.14222	2.40184	1.8577

## Sheet: Fig. 1b
Figure 1B
BSA								L+P
7.9688	7.4707	9.9609	9.4629	6.4746	5.9766	5.4785	6.4746	3.4863	6.4746	3.9844	3.9844	4.4824	4.9805	5.9766	5.4785
7.4707	5.9766	7.9688	8.4668	6.4746	5.9766	4.9805	5.9766	3.4863	6.4746	3.9844	2.4902	4.4824	4.4824	5.4785	3.9844
7.4707	5.4785	7.9688	6.4746	5.9766	5.9766	4.4824	5.9766	3.4863	5.4785	3.4863	2.4902	3.9844	3.9844	4.9805	3.4863
7.4707	5.4785	7.9688	5.9766	5.9766	5.4785	3.4863	5.4785	3.4863	4.9805	3.4863	2.4902	3.4863	3.9844	4.4824	3.4863
6.9727	5.4785	7.4707	5.9766	4.9805	5.4785	3.4863	5.4785	2.9883	4.4824	3.4863	2.4902	3.4863	3.4863	3.9844	3.4863
6.9727	5.4785	7.4707	5.4785	4.9805	5.4785	3.4863	5.4785	2.9883	4.4824	3.4863	2.4902	3.4863	3.4863	3.9844	2.9883
6.9727	4.9805	6.9727	4.9805	4.9805	4.4824	3.4863	5.4785	2.4902	4.4824	2.9883	2.4902	2.9883	3.4863	3.4863	2.9883
6.9727	4.9805	6.4746	4.9805	4.4824	4.4824	3.4863	4.9805	2.4902	3.4863	2.9883	2.4902	2.9883	3.4863	3.4863	2.9883
6.4746	4.9805	6.4746	4.4824	4.4824	3.9844	3.4863	4.9805	2.4902	3.4863	2.9883	2.4902	2.9883	3.4863	2.9883	2.4902
6.4746	4.9805	6.4746	4.4824	3.9844	3.9844	3.4863	4.4824	2.4902	2.9883	2.9883	2.4902	2.9883	3.4863	2.9883	2.4902
6.4746	4.4824	6.4746	4.4824	3.9844	3.9844	2.9883	4.4824	2.4902	2.9883	2.4902	2.4902	2.9883	2.9883	2.9883	2.4902
5.9766	4.4824	6.4746	4.4824	3.9844	3.9844	2.9883	4.4824	2.4902	2.9883	2.4902	1.9922	2.9883	2.9883	2.9883	2.4902
5.9766	4.4824	6.4746	4.4824	3.4863	3.9844	2.9883	3.9844	1.9922	2.9883	2.4902	1.9922	2.9883	2.9883	2.9883	2.4902
5.9766	4.4824	5.9766	4.4824	3.4863	3.9844	2.9883	3.9844	1.9922	2.9883	2.4902	1.9922	2.9883	2.9883	2.9883	2.4902
5.9766	4.4824	5.9766	4.4824	3.4863	3.9844	2.9883	3.9844	1.9922	2.4902	2.4902	1.9922	2.4902	2.9883	2.9883	2.4902
5.9766	4.4824	5.9766	3.9844	3.4863	3.4863	2.9883	3.9844	1.9922	2.4902	2.4902	1.9922	2.4902	2.9883	2.9883	2.4902
5.9766	4.4824	5.9766	3.9844	3.4863	3.4863	2.9883	3.9844	1.9922	2.4902	2.4902	1.9922	2.4902	2.9883	2.9883	1.9922
5.4785	4.4824	5.4785	3.9844	3.4863	3.4863	2.9883	3.9844	1.9922	1.9922	2.4902	1.9922	2.4902	2.9883	2.9883	1.9922
5.4785	3.9844	5.4785	3.9844	3.4863	3.4863	2.9883	3.4863	1.9922	1.9922	2.4902	1.9922	1.9922	2.9883	2.4902	1.9922
5.4785	3.9844	5.4785	3.9844	3.4863	3.4863	2.9883	3.4863	1.4941	1.9922	2.4902	1.9922	1.9922	2.9883	2.4902	1.9922
5.4785	3.9844	5.4785	3.9844	3.4863	3.4863	2.9883	3.4863	1.4941	1.9922	1.9922	1.9922	1.9922	2.4902	2.4902	1.9922
5.4785	3.9844	5.4785	3.9844	2.9883	3.4863	2.9883	3.4863	1.4941	1.9922	1.9922	1.4941	1.9922	2.4902	2.4902	1.9922
5.4785	3.9844	4.9805	3.9844	2.9883	2.9883	2.9883	3.4863	1.4941	1.9922	1.9922	1.4941	1.9922	2.4902	2.4902	1.9922
5.4785	3.9844	4.9805	3.4863	2.9883	2.9883	2.4902	3.4863	1.4941	1.9922	1.9922	1.4941	1.9922	2.4902	2.4902	1.9922
5.4785	3.9844	4.9805	3.4863	2.9883	2.9883	2.4902	3.4863	1.4941	1.9922	1.9922	1.4941	1.9922	2.4902	2.4902	1.9922
5.4785	3.9844	4.9805	3.4863	2.9883	2.9883	2.4902	3.4863	1.4941	1.4941	1.9922	1.4941	1.9922	2.4902	2.4902	1.9922
5.4785	3.9844	4.9805	3.4863	2.4902	2.9883	2.4902	3.4863	1.4941	1.4941	1.9922	1.4941	1.4941	2.4902	2.4902	1.9922
4.9805	3.9844	4.9805	3.4863	2.4902	2.9883	2.4902	3.4863	1.4941	1.4941	1.9922	1.4941	1.4941	2.4902	2.4902	1.9922
4.4824	3.9844	4.4824	3.4863	2.4902	2.9883	2.4902	3.4863	1.4941	1.4941	1.9922	1.4941	1.4941	2.4902	2.4902	1.9922
4.4824	3.9844	4.4824	3.4863	2.4902	2.9883	2.4902	2.9883	1.4941	1.4941	1.9922	1.4941	1.4941	2.4902	2.4902	1.9922
4.4824	3.9844	4.4824	3.4863	2.4902	2.9883	2.4902	2.9883	1.4941	1.4941	1.9922	1.4941	1.4941	1.9922	1.9922	1.9922
4.4824	3.9844	4.4824	3.4863	2.4902	2.9883	2.4902	2.9883	1.4941	1.4941	1.9922	1.4941	1.4941	1.9922	1.9922	1.4941
4.4824	3.9844	4.4824	3.4863	2.4902	2.9883	2.4902	2.9883	1.4941	1.4941	1.9922	1.4941	1.4941	1.9922	1.9922	1.4941
4.4824	3.9844	4.4824	3.4863	2.4902	2.9883	2.4902	2.9883	1.4941	1.4941	1.9922	1.4941	1.4941	1.9922	1.9922	1.4941
3.9844	3.9844	4.4824	3.4863	2.4902	2.9883	2.4902	2.9883	1.4941	1.4941	1.9922	1.4941	1.4941	1.9922	1.9922	1.4941
3.9844	3.9844	4.4824	2.9883	2.4902	2.9883	2.4902	2.9883	1.4941	1.4941	1.9922	0.9961	1.4941	1.9922	1.9922	1.4941
3.9844	3.9844	4.4824	2.9883	2.4902	2.9883	2.4902	2.9883	1.4941	1.4941	1.4941	0.9961	1.4941	1.9922	1.9922	1.4941
3.9844	3.9844	4.4824	2.9883	2.4902	2.9883	2.4902	2.9883	0.9961	1.4941	1.4941	0.9961	1.4941	1.9922	1.9922	1.4941
3.9844	3.4863	3.9844	2.9883	2.4902	2.9883	2.4902	2.9883	0.9961	1.4941	1.4941	0.9961	1.4941	1.9922	1.9922	1.4941
3.9844	3.4863	3.9844	2.9883	2.4902	2.9883	2.4902	2.9883	0.9961	1.4941	1.4941	0.9961	1.4941	1.9922	1.9922	1.4941
3.9844	3.4863	3.9844	2.9883	2.4902	2.9883	2.4902	2.4902	0.9961	1.4941	1.4941	0.9961	1.4941	1.9922	1.9922	1.4941
3.9844	3.4863	3.9844	2.9883	1.9922	2.4902	2.4902	2.4902	0.9961	1.4941	1.4941	0.9961	1.4941	1.9922	1.9922	1.4941
3.9844	3.4863	3.9844	2.4902	1.9922	2.4902	2.4902	2.4902	0.9961	1.4941	1.4941	0.9961	1.4941	1.9922	1.9922	1.4941
3.9844	3.4863	3.9844	2.4902	1.9922	2.4902	1.9922	2.4902	0.9961	0.9961	1.4941	0.9961	1.4941	1.9922	1.9922	1.4941
3.9844	3.4863	3.9844	2.4902	1.9922	2.4902	1.9922	2.4902	0.9961	0.9961	1.4941	0.9961	1.4941	1.9922	1.9922	1.4941
3.4863	3.4863	3.9844	2.4902	1.9922	2.4902	1.9922	2.4902	0.9961	0.9961	1.4941	0.9961	1.4941	1.9922	1.9922	1.4941
3.4863	3.4863	3.9844	2.4902	1.9922	2.4902	1.9922	2.4902	0.9961	0.9961	1.4941	0.9961	1.4941	1.9922	1.9922	1.4941
3.4863	3.4863	3.9844	2.4902	1.9922	2.4902	1.9922	2.4902	0.9961	0.9961	1.4941	0.9961	1.4941	1.9922	1.9922	1.4941
3.4863	3.4863	3.4863	2.4902	1.9922	2.4902	1.9922	1.9922	0.9961	0.9961	1.4941	0.9961	1.4941	1.9922	1.9922	1.4941
3.4863	3.4863	3.4863	2.4902	1.9922	2.4902	1.9922	1.9922	0.9961	0.9961	1.4941	0.9961	1.4941	1.9922	1.9922	1.4941
3.4863	3.4863	3.4863	2.4902	1.9922	2.4902	1.9922	1.9922	0.9961	0.9961	1.4941	0.9961	1.4941	1.9922	1.9922	0.9961
3.4863	3.4863	3.4863	2.4902	1.9922	2.4902	1.9922	1.9922	0.9961	0.9961	1.4941	0.9961	0.9961	1.9922	1.9922	0.9961
3.4863	3.4863	3.4863	2.4902	1.9922	2.4902	1.9922	1.9922	0.9961	0.9961	0.9961	0.9961	0.9961	1.9922	1.9922	0.9961
3.4863	3.4863	3.4863	2.4902	1.4941	2.4902	1.9922	1.9922	0.9961	0.9961	0.9961	0.9961	0.9961	1.4941	1.9922	0.9961
3.4863	3.4863	3.4863	2.4902	1.4941	2.4902	1.9922	1.9922	0.9961	0.9961	0.9961	0.9961	0.9961	1.4941	1.9922	0.9961
3.4863	3.4863	3.4863	2.4902	1.4941	1.9922	1.9922	1.9922	0.9961	0.9961	0.9961	0.9961	0.9961	1.4941	1.9922	0.9961
3.4863	3.4863	3.4863	2.4902	1.4941	1.9922	1.9922	1.9922	0.9961	0.9961	0.9961	0.498	0.9961	1.4941	1.9922	0.9961
3.4863	3.4863	3.4863	2.4902	1.4941	1.9922	1.9922	1.9922	0.9961	0.9961	0.9961	0.498	0.9961	1.4941	1.9922	0.9961
3.4863	3.4863	3.4863	1.9922	1.4941	1.9922	1.9922	1.9922	0.9961	0.9961	0.9961	0.498	0.9961	1.4941	1.9922	0.9961
3.4863	3.4863	3.4863	1.9922	1.4941	1.9922	1.9922	1.9922	0.9961	0.9961	0.9961	0.498	0.9961	1.4941	1.4941	0.9961
2.9883	3.4863	3.4863	1.9922	1.4941	1.9922	1.9922	1.9922	0.9961	0.9961	0.9961	0.498	0.9961	1.4941	1.4941	0.9961
2.9883	3.4863	3.4863	1.9922	1.4941	1.9922	1.9922	1.9922	0.498	0.9961	0.9961	0.498	0.9961	1.4941	1.4941	0.9961
2.9883	3.4863	3.4863	1.9922	1.4941	1.9922	1.9922	1.9922	0.498	0.9961	0.9961	0.498	0.9961	1.4941	1.4941	0.9961
2.9883	3.4863	2.9883	1.9922	1.4941	1.9922	1.4941	1.9922	0.498	0.9961	0.9961	0.498	0.9961	1.4941	1.4941	0.9961
2.9883	3.4863	2.9883	1.9922	1.4941	1.9922	1.4941	1.9922	0.498	0.9961	0.9961	0.498	0.9961	1.4941	1.4941	0.9961
2.9883	3.4863	2.9883	1.9922	1.4941	1.9922	1.4941	1.9922	0.498	0.9961	0.9961	0.498	0.9961	1.4941	1.4941	0.9961
2.9883	3.4863	2.9883	1.9922	1.4941	1.4941	1.4941	1.9922	0.498	0.9961	0.9961	0.498	0.9961	1.4941	1.4941	0.9961
2.9883	2.9883	2.9883	1.9922	1.4941	1.4941	1.4941	1.9922	0.498	0.9961	0.9961	0.498	0.9961	1.4941	1.4941	0.9961
2.9883	2.9883	2.9883	1.9922	1.4941	1.4941	1.4941	1.9922	0.498	0.498	0.9961	0.498	0.9961	1.4941	1.4941	0.9961
2.9883	2.9883	2.9883	1.9922	1.4941	1.4941	1.4941	1.9922	0.498	0.498	0.9961	0.498	0.9961	1.4941	1.4941	0.9961
2.9883	2.9883	2.9883	1.9922	1.4941	1.4941	1.4941	1.9922	0.498	0.498	0.9961	0.498	0.9961	1.4941	1.4941	0.9961
2.9883	2.9883	2.9883	1.9922	1.4941	1.4941	1.4941	1.9922	0.498	0.498	0.9961	0.498	0.9961	1.4941	1.4941	0.9961
2.9883	2.9883	2.9883	1.9922	1.4941	1.4941	1.4941	1.9922	0.498	0.498	0.9961	0.498	0.9961	1.4941	1.4941	0.9961
2.9883	2.9883	2.9883	1.9922	1.4941	1.4941	1.4941	1.9922	0.498	0.498	0.9961	0.498	0.9961	1.4941	1.4941	0.9961
2.9883	2.9883	2.9883	1.9922	1.4941	1.4941	1.4941	1.9922	0.498	0.498	0.9961	0.498	0.9961	1.4941	1.4941	0.9961
2.9883	2.9883	2.9883	1.9922	1.4941	1.4941	1.4941	1.4941	0.498	0.498	0.9961	0.498	0.9961	1.4941	1.4941	0.9961
2.9883	2.9883	2.9883	1.9922	1.4941	1.4941	1.4941	1.4941	0.498	0.498	0.9961	0.498	0.9961	1.4941	1.4941	0.9961
2.4902	2.9883	2.9883	1.9922	1.4941	1.4941	1.4941	1.4941	0.498	0.498	0.9961	0.498	0.9961	1.4941	1.4941	0.9961
2.4902	2.9883	2.9883	1.9922	1.4941	1.4941	1.4941	1.4941	0.498	0.498	0.9961	0.498	0.9961	1.4941	1.4941	0.9961
2.4902	2.9883	2.9883	1.9922	1.4941	1.4941	1.4941	1.4941	0.498	0.498	0.498	0.498	0.9961	1.4941	1.4941	0.9961
2.4902	2.9883	2.9883	1.9922	1.4941	1.4941	1.4941	1.4941	0.498	0.498	0.498	0.498	0.9961	1.4941	1.4941	0.9961
2.4902	2.9883	2.9883	1.9922	1.4941	1.4941	1.4941	1.4941	0.498	0.498	0.498	0.498	0.9961	1.4941	1.4941	0.9961
2.4902	2.9883	2.4902	1.9922	1.4941	1.4941	1.4941	1.4941	0.498	0.498	0.498	0.498	0.9961	1.4941	1.4941	0.9961
2.4902	2.4902	2.4902	1.9922	1.4941	1.4941	1.4941	1.4941	0.498	0.498	0.498	0.498	0.9961	1.4941	1.4941	0.9961
2.4902	2.4902	2.4902	1.9922	0.9961	1.4941	1.4941	1.4941	0.498	0.498	0.498	0.498	0.9961	1.4941	1.4941	0.9961
2.4902	2.4902	2.4902	1.9922	0.9961	1.4941	1.4941	1.4941	0.498	0.498	0.498	0.498	0.9961	1.4941	1.4941	0.9961
2.4902	2.4902	2.4902	1.9922	0.9961	1.4941	1.4941	1.4941	0.498	0.498	0.498	0.498	0.9961	1.4941	1.4941	0.9961
2.4902	2.4902	2.4902	1.9922	0.9961	0.9961	0.9961	1.4941	0.498	0.498	0.498	0.498	0.9961	1.4941	1.4941	0.9961
2.4902	2.4902	2.4902	1.4941	0.9961	0.9961	0.9961	1.4941	0.498	0.498	0.498	0.498	0.9961	1.4941	1.4941	0.9961
2.4902	2.4902	2.4902	1.4941	0.9961	0.9961	0.9961	1.4941	0.498	0.498	0.498	0.498	0.498	1.4941	0.9961	0.9961
2.4902	2.4902	2.4902	1.4941	0.9961	0.9961	0.9961	1.4941	0.498	0.498	0.498		0.498	0.9961	0.9961	0.9961
2.4902	2.4902	2.4902	1.4941	0.9961	0.9961	0.9961	1.4941	0.498	0.498	0.498		0.498	0.9961	0.9961	0.9961
2.4902	2.4902	2.4902	1.4941	0.9961	0.9961	0.9961	1.4941	0.498	0.498	0.498		0.498	0.9961	0.9961	0.9961
2.4902	2.4902	2.4902	1.4941	0.9961	0.9961	0.9961	1.4941	0.498	0.498	0.498		0.498	0.9961	0.9961	0.9961
2.4902	2.4902	2.4902	1.4941	0.9961	0.9961	0.9961	1.4941	0.498	0.498	0.498		0.498	0.9961	0.9961	0.9961
2.4902	2.4902	2.4902	1.4941	0.9961	0.9961	0.9961	1.4941	0.498	0.498	0.498		0.498	0.9961	0.9961	0.9961
2.4902	2.4902	2.4902	1.4941	0.9961	0.9961	0.9961	1.4941	0.498	0.498	0.498		0.498	0.9961	0.9961	0.9961
2.4902	2.4902	2.4902	1.4941	0.9961	0.9961	0.9961	1.4941	0.498	0.498	0.498		0.498	0.9961	0.9961	0.9961
2.4902	2.4902	2.4902	1.4941	0.9961	0.9961	0.9961	1.4941	0.498	0.498	0.498		0.498	0.9961	0.9961	0.9961
2.4902	2.4902	2.4902	1.4941	0.9961	0.9961	0.9961	1.4941	0.498	0.498	0.498		0.498	0.9961	0.9961	0.9961
2.4902	2.4902	2.4902	1.4941	0.9961	0.9961	0.9961	1.4941	0.498	0.498	0.498		0.498	0.9961	0.9961	0.9961
2.4902	2.4902	2.4902	1.4941	0.9961	0.9961	0.9961	1.4941	0.498	0.498	0.498		0.498	0.9961	0.9961	0.9961
1.9922	2.4902	2.4902	1.4941	0.9961	0.9961	0.9961	1.4941	0.498	0.498	0.498		0.498	0.9961	0.9961	0.9961
1.9922	2.4902	2.4902	1.4941	0.9961	0.9961	0.9961	1.4941		0.498	0.498		0.498	0.9961	0.9961	0.9961
1.9922	2.4902	2.4902	1.4941	0.9961	0.9961	0.9961	1.4941		0.498	0.498		0.498	0.9961	0.9961	0.9961
1.9922	2.4902	2.4902	1.4941	0.9961	0.9961	0.9961	1.4941		0.498	0.498		0.498	0.9961	0.9961	0.498
1.9922	2.4902	2.4902	1.4941	0.9961	0.9961	0.9961	1.4941		0.498	0.498		0.498	0.9961	0.9961	0.498
1.9922	2.4902	2.4902	1.4941	0.9961	0.9961	0.9961	1.4941		0.498	0.498		0.498	0.9961	0.9961	0.498
1.9922	2.4902	1.9922	1.4941	0.9961	0.9961	0.9961	1.4941		0.498	0.498		0.498	0.9961	0.9961	0.498
1.9922	2.4902	1.9922	1.4941	0.9961	0.9961	0.9961	1.4941		0.498	0.498		0.498	0.9961	0.9961	0.498
1.9922	2.4902	1.9922	1.4941	0.9961	0.9961	0.9961	1.4941		0.498	0.498		0.498	0.9961	0.9961	0.498
1.9922	2.4902	1.9922	1.4941	0.9961	0.9961	0.9961	1.4941		0.498	0.498		0.498	0.9961	0.9961	0.498
1.9922	2.4902	1.9922	1.4941	0.9961	0.9961	0.9961	1.4941		0.498	0.498		0.498	0.9961	0.9961	0.498
1.9922	2.4902	1.9922	1.4941	0.9961	0.9961	0.9961	1.4941		0.498	0.498		0.498	0.9961	0.9961	0.498
1.9922	1.9922	1.9922	1.4941	0.9961	0.9961	0.9961	1.4941		0.498	0.498		0.498	0.9961	0.9961	0.498
1.9922	1.9922	1.9922	1.4941	0.9961	0.9961	0.9961	0.9961		0.498	0.498		0.498	0.9961	0.9961	0.498
1.9922	1.9922	1.9922	1.4941	0.9961	0.9961	0.9961	0.9961		0.498	0.498		0.498	0.9961	0.9961	0.498
1.9922	1.9922	1.9922	1.4941	0.9961	0.9961	0.9961	0.9961		0.498	0.498		0.498	0.9961	0.9961	0.498
1.9922	1.9922	1.9922	1.4941	0.9961	0.9961	0.9961	0.9961		0.498	0.498		0.498	0.9961	0.9961	0.498
1.9922	1.9922	1.9922	1.4941	0.9961	0.9961	0.9961	0.9961		0.498			0.498	0.9961	0.9961	0.498
1.9922	1.9922	1.9922	1.4941	0.9961	0.9961	0.9961	0.9961		0.498			0.498	0.9961	0.9961	0.498
1.9922	1.9922	1.9922	1.4941	0.9961	0.9961	0.498	0.9961		0.498			0.498	0.9961	0.9961	0.498
1.9922	1.9922	1.9922	1.4941	0.9961	0.9961	0.498	0.9961		0.498			0.498	0.9961	0.9961	0.498
1.9922	1.9922	1.9922	1.4941	0.9961	0.498	0.498	0.9961		0.498			0.498	0.9961	0.9961	0.498
1.9922	1.9922	1.9922	1.4941	0.9961	0.498	0.498	0.9961		0.498			0.498	0.9961	0.9961	0.498
1.9922	1.9922	1.9922	1.4941	0.9961	0.498	0.498	0.9961		0.498			0.498	0.9961	0.9961	0.498
1.9922	1.9922	1.9922	1.4941	0.498	0.498	0.498	0.9961					0.498	0.9961	0.9961	0.498
1.9922	1.9922	1.9922	1.4941	0.498	0.498	0.498	0.9961					0.498	0.9961	0.9961	0.498
1.9922	1.9922	1.9922	1.4941	0.498	0.498	0.498	0.9961					0.498	0.9961	0.9961	0.498
1.9922	1.9922	1.9922	1.4941	0.498	0.498	0.498	0.9961					0.498	0.9961	0.9961	0.498
1.9922	1.9922	1.9922	1.4941	0.498	0.498	0.498	0.9961					0.498	0.9961	0.9961	0.498
1.4941	1.9922	1.9922	0.9961	0.498	0.498	0.498	0.9961					0.498	0.9961	0.9961	0.498
1.4941	1.9922	1.9922	0.9961	0.498	0.498	0.498	0.9961					0.498	0.9961	0.9961	0.498
1.4941	1.9922	1.9922	0.9961	0.498	0.498	0.498	0.9961					0.498	0.9961	0.9961	0.498
1.4941	1.9922	1.4941	0.9961	0.498	0.498	0.498	0.9961					0.498	0.9961	0.9961	0.498
1.4941	1.9922	1.4941	0.9961	0.498	0.498	0.498	0.9961					0.498	0.9961	0.9961	0.498
1.4941	1.9922	1.4941	0.9961	0.498	0.498	0.498	0.9961					0.498	0.9961	0.9961	0.498
1.4941	1.9922	1.4941	0.9961	0.498	0.498	0.498	0.9961					0.498	0.9961	0.9961	0.498
1.4941	1.9922	1.4941	0.9961	0.498	0.498	0.498	0.9961					0.498	0.9961	0.498	0.498
1.4941	1.9922	1.4941	0.9961	0.498	0.498	0.498	0.9961					0.498	0.9961	0.498	0.498
1.4941	1.9922	1.4941	0.9961	0.498	0.498	0.498	0.9961					0.498	0.9961	0.498	0.498
1.4941	1.9922	1.4941	0.9961	0.498	0.498	0.498	0.9961					0.498	0.9961	0.498	0.498
1.4941	1.9922	1.4941	0.9961	0.498	0.498	0.498	0.9961					0.498	0.498	0.498	0.498
1.4941	1.9922	1.4941	0.9961	0.498	0.498	0.498	0.9961					0.498	0.498	0.498	0.498
1.4941	1.9922	1.4941	0.9961	0.498	0.498	0.498	0.9961					0.498	0.498	0.498	0.498
1.4941	1.9922	1.4941	0.9961	0.498	0.498	0.498	0.9961					0.498	0.498	0.498	0.498
1.4941	1.9922	1.4941	0.9961	0.498	0.498	0.498	0.9961					0.498	0.498	0.498	0.498
1.4941	1.9922	1.4941	0.9961	0.498	0.498	0.498	0.9961					0.498	0.498	0.498	0.498
1.4941	1.9922	1.4941	0.9961	0.498	0.498	0.498	0.9961					0.498	0.498	0.498	0.498
1.4941	1.9922	1.4941	0.9961	0.498	0.498	0.498	0.9961					0.498	0.498	0.498	0.498
1.4941	1.9922	1.4941	0.9961	0.498	0.498	0.498	0.9961						0.498	0.498	0.498
1.4941	1.9922	1.4941	0.9961	0.498	0.498	0.498	0.9961						0.498	0.498	0.498
1.4941	1.9922	1.4941	0.9961	0.498	0.498	0.498	0.9961						0.498	0.498	0.498
1.4941	1.9922	1.4941	0.9961	0.498	0.498	0.498	0.498						0.498	0.498	0.498
0.9961	1.9922	1.4941	0.9961	0.498	0.498		0.498						0.498	0.498	0.498
0.9961	1.9922	1.4941	0.9961	0.498	0.498		0.498						0.498	0.498	0.498
0.9961	1.9922	1.4941	0.9961	0.498	0.498		0.498						0.498	0.498	0.498
0.9961	1.9922	1.4941	0.9961	0.498			0.498						0.498	0.498	0.498
0.9961	1.9922	1.4941	0.9961	0.498			0.498						0.498	0.498	0.498
0.9961	1.9922	1.4941	0.9961	0.498			0.498						0.498	0.498	0.498
0.9961	1.9922	1.4941	0.9961	0.498			0.498						0.498	0.498	0.498
0.9961	1.4941	1.4941	0.9961				0.498						0.498	0.498	0.498
0.9961	1.4941	1.4941	0.9961				0.498						0.498	0.498	0.498
0.9961	1.4941	1.4941	0.9961				0.498						0.498	0.498	0.498
0.9961	1.4941	1.4941	0.9961				0.498						0.498	0.498	0.498
0.9961	1.4941	1.4941	0.9961				0.498						0.498	0.498	0.498
0.9961	1.4941	1.4941	0.9961				0.498						0.498	0.498	0.498
0.9961	1.4941	1.4941	0.9961				0.498						0.498	0.498	0.498
0.9961	1.4941	1.4941	0.9961				0.498						0.498	0.498	0.498
0.9961	1.4941	1.4941	0.9961				0.498						0.498	0.498	0.498
0.9961	1.4941	1.4941	0.9961				0.498						0.498	0.498	0.498
0.9961	1.4941	1.4941	0.9961				0.498						0.498	0.498	0.498
0.9961	1.4941	1.4941	0.498				0.498						0.498	0.498	0.498
0.9961	1.4941	1.4941	0.498				0.498						0.498	0.498	0.498
0.9961	1.4941	1.4941	0.498				0.498						0.498	0.498	0.498
0.9961	1.4941	1.4941	0.498				0.498						0.498	0.498	0.498
0.498	1.4941	0.9961	0.498				0.498						0.498	0.498
0.498	1.4941	0.9961	0.498				0.498						0.498	0.498
0.498	1.4941	0.9961	0.498				0.498						0.498	0.498
0.498	1.4941	0.9961	0.498				0.498						0.498
0.498	1.4941	0.9961	0.498				0.498						0.498
0.498	1.4941	0.9961	0.498				0.498						0.498
0.498	1.4941	0.9961	0.498				0.498						0.498
0.498	1.4941	0.9961	0.498				0.498						0.498
0.498	1.4941	0.9961	0.498				0.498						0.498
0.498	1.4941	0.9961	0.498				0.498						0.498
0.498	1.4941	0.9961	0.498				0.498						0.498
0.498	1.4941	0.9961	0.498				0.498						0.498
0.498	1.4941	0.9961	0.498				0.498						0.498
0.498	1.4941	0.9961	0.498				0.498						0.498
0.498	1.4941	0.9961	0.498				0.498						0.498
0.498	1.4941	0.9961	0.498				0.498						0.498
0.498	1.4941	0.9961	0.498				0.498						0.498
0.498	1.4941	0.9961	0.498				0.498						0.498
0.498	1.4941	0.9961	0.498				0.498						0.498
0.498	1.4941	0.9961	0.498				0.498						0.498
0.498	1.4941	0.9961	0.498										0.498
0.498	1.4941	0.9961	0.498										0.498
0.498	1.4941	0.9961	0.498										0.498
0.498	1.4941	0.9961	0.498										0.498
0.498	1.4941	0.9961	0.498										0.498
0.498	1.4941	0.9961	0.498										0.498
	1.4941	0.9961	0.498										0.498
	0.9961	0.9961	0.498										0.498
	0.9961	0.9961	0.498										0.498
	0.9961	0.9961	0.498
	0.9961	0.9961	0.498
	0.9961	0.9961	0.498
	0.9961	0.9961	0.498
	0.9961	0.9961	0.498
	0.9961	0.9961	0.498
	0.9961	0.9961	0.498
	0.9961	0.9961	0.498
	0.9961	0.9961	0.498
	0.9961	0.9961	0.498
	0.9961	0.9961	0.498
	0.9961	0.9961	0.498
	0.9961	0.9961	0.498
	0.9961	0.9961	0.498
	0.9961	0.9961	0.498
	0.9961	0.9961	0.498
	0.9961	0.9961	0.498
	0.9961	0.9961	0.498
	0.9961	0.498	0.498
	0.9961	0.498	0.498
	0.9961	0.498	0.498
	0.9961	0.498	0.498
	0.9961	0.498	0.498
	0.9961	0.498	0.498
	0.9961	0.498	0.498
	0.9961	0.498	0.498
	0.9961	0.498	0.498
	0.9961	0.498
	0.9961	0.498
	0.9961	0.498
	0.9961	0.498
	0.9961	0.498
	0.9961	0.498
	0.9961	0.498
	0.9961	0.498
	0.9961	0.498
	0.9961	0.498
	0.9961	0.498
	0.9961	0.498
	0.9961	0.498
	0.9961	0.498
	0.9961	0.498
	0.9961	0.498
	0.9961	0.498
	0.9961	0.498
	0.9961	0.498
	0.9961	0.498
	0.9961	0.498
	0.9961	0.498
	0.9961	0.498
	0.9961	0.498
	0.498	0.498
	0.498	0.498
	0.498	0.498
	0.498	0.498
	0.498	0.498
	0.498	0.498
	0.498	0.498
	0.498	0.498
	0.498	0.498
	0.498	0.498
	0.498	0.498
	0.498	0.498
	0.498	0.498
	0.498	0.498
	0.498	0.498
	0.498	0.498
	0.498	0.498
	0.498	0.498
	0.498	0.498
	0.498	0.498
	0.498	0.498
	0.498	0.498
	0.498	0.498
	0.498
	0.498
	0.498
	0.498
	0.498
	0.498
	0.498
	0.498
	0.498
	0.498
	0.498
	0.498
	0.498
	0.498
	0.498
	0.498
	0.498
	0.498
	0.498
	0.498
	0.498
	0.498
	0.498
	0.498
	0.498
	0.498
	0.498
	0.498
	0.498
	0.498
	0.498
	0.498
	0.498
	0.498

## Sheet: Fig. 1c
Figure 1C
Fluo-3 upper								Fura lower
BSA			L+P					BSA	LPS	L+P
4.48242	7.4707	10.957	14.4434	10.957	17.4316			33.6748	16.1591	73.5319
3.98438	6.47461	10.459	13.4473	10.459	16.4355			40.2169	31.5295	59.1964
3.48633	6.47461	9.96094	12.9492	9.96094	16.4355			47.497	45.1353	49.7526
3.48633	6.47461	9.96094	12.9492	9.46289	16.4355			11.899	42.5463	59.3623
3.48633	5.97656	9.96094	12.4512	9.46289	15.9375			35.2861	48.8415	51.1728
2.98828	5.47852	9.46289	12.4512	8.96484	14.9414			67.6056	33.7049	61.0951
2.98828	5.47852	9.46289	12.4512	8.96484	14.4434			8.91918		42.0365
2.98828	5.47852	8.96484	12.4512	8.4668	14.4434					71.5282
2.49023	4.98047	8.96484	11.4551	8.4668	12.4512					51.6995
2.49023	4.98047	8.96484	11.4551	8.4668	10.957					40.1802
2.49023	4.48242	8.96484	11.4551	8.4668	10.459					46.8821
2.49023	3.98438	8.96484	10.459	8.4668	9.96094					35.0987
2.49023	3.98438	8.4668	9.46289	8.4668	9.46289					55.1066
2.49023	3.98438	8.4668	8.96484	8.4668	8.96484
1.99219	3.98438	8.4668	8.96484	7.96875	8.4668
1.99219	3.48633	8.4668	8.4668	7.96875	6.97266
1.99219	2.98828	8.4668	7.96875	7.96875	6.47461
1.99219	2.98828	8.4668	7.4707	7.96875	6.47461
1.99219	2.98828	8.4668	7.4707	7.4707	5.97656
1.99219	2.98828	7.96875	7.4707	7.4707	5.47852
1.99219	2.49023	7.96875	7.4707	7.4707	5.47852
1.99219	2.49023	7.96875	6.97266	7.4707	5.47852
1.99219	2.49023	7.96875	6.97266	7.4707	5.47852
1.99219	2.49023	7.4707	6.97266	7.4707	5.47852
1.99219	2.49023	7.4707	6.47461	7.4707	4.98047
1.49414	2.49023	7.4707	6.47461	7.4707	4.98047
1.49414	2.49023	7.4707	6.47461	6.97266	4.98047
1.49414	2.49023	7.4707	6.47461	6.97266	4.98047
1.49414	2.49023	7.4707	6.47461	6.97266	4.98047
1.49414	2.49023	7.4707	6.47461	6.97266	4.98047
1.49414	2.49023	7.4707	5.97656	6.47461	4.98047
1.49414	2.49023	7.4707	5.97656	6.47461	4.98047
1.49414	2.49023	6.97266	5.97656	6.47461	4.98047
1.49414	1.99219	6.97266	5.97656	6.47461	4.48242
1.49414	1.99219	6.97266	5.97656	6.47461	4.48242
1.49414	1.99219	6.97266	5.97656	6.47461	4.48242
1.49414	1.99219	6.97266	5.47852	6.47461	4.48242
1.49414	1.99219	6.97266	5.47852	5.97656	4.48242
1.49414	1.99219	6.47461	5.47852	5.97656	4.48242
0.996094	1.99219	6.47461	5.47852	5.97656	4.48242
0.996094	1.99219	6.47461	4.98047	5.97656	4.48242
0.996094	1.99219	6.47461	4.98047	5.97656	4.48242
0.996094	1.99219	6.47461	4.98047	5.97656	3.98438
0.996094	1.99219	6.47461	4.98047	5.97656	3.98438
0.996094	1.99219	6.47461	4.98047	5.47852	3.98438
0.996094	1.99219	6.47461	4.98047	5.47852	3.98438
0.996094	1.99219	6.47461	4.98047	5.47852	3.98438
0.996094	1.99219	6.47461	4.48242	4.98047	3.98438
0.996094	1.99219	6.47461	4.48242	4.98047	3.98438
0.996094	1.99219	6.47461	4.48242	4.98047	3.98438
0.996094	1.99219	5.97656	4.48242	4.98047	3.98438
0.996094	1.99219	5.97656	4.48242	4.98047	3.48633
0.996094	1.49414	5.97656	4.48242	4.98047	3.48633
0.996094	1.49414	5.97656	4.48242	4.98047	3.48633
0.996094	1.49414	5.97656	4.48242	4.98047	3.48633
0.996094	1.49414	5.97656	4.48242	4.48242	3.48633
0.996094	1.49414	5.97656	4.48242	4.48242	3.48633
0.996094	1.49414	5.97656	3.98438	4.48242	3.48633
0.996094	1.49414	5.97656	3.98438	4.48242	3.48633
0.996094	1.49414	5.97656	3.98438	4.48242	3.48633
0.996094	1.49414	5.97656	3.98438	4.48242	3.48633
0.996094	1.49414	5.47852	3.98438	4.48242	3.48633
0.996094	1.49414	5.47852	3.98438	4.48242	3.48633
0.996094	1.49414	5.47852	3.98438	4.48242	3.48633
0.996094	1.49414	5.47852	3.98438	4.48242	3.48633
0.996094	1.49414	5.47852	3.98438	4.48242	3.48633
0.996094	1.49414	5.47852	3.98438	4.48242	3.48633
0.498047	1.49414	5.47852	3.98438	4.48242	3.48633
0.498047	1.49414	5.47852	3.98438	4.48242	2.98828
0.498047	1.49414	5.47852	3.48633	4.48242	2.98828
0.498047	1.49414	5.47852	3.48633	4.48242	2.98828
0.498047	1.49414	5.47852	3.48633	4.48242	2.98828
0.498047	0.996094	5.47852	3.48633	4.48242	2.98828
0.498047	0.996094	5.47852	3.48633	4.48242	2.98828
0.498047	0.996094	5.47852	3.48633	4.48242	2.98828
0.498047	0.996094	5.47852	3.48633	4.48242	2.98828
0.498047	0.996094	5.47852	3.48633	3.98438	2.98828
0.498047	0.996094	5.47852	3.48633	3.98438	2.98828
0.498047	0.996094	4.98047	3.48633	3.98438	2.49023
0.498047	0.996094	4.98047	3.48633	3.98438	2.49023
0.498047	0.996094	4.98047	3.48633	3.98438	2.49023
0.498047	0.996094	4.98047	3.48633	3.98438	2.49023
0.498047	0.996094	4.98047	2.98828	3.48633	2.49023
0.498047	0.996094	4.48242	2.98828	3.48633	2.49023
0.498047	0.996094	4.48242	2.98828	3.48633	2.49023
0.498047	0.996094	4.48242	2.98828	3.48633	2.49023
0.498047	0.996094	4.48242	2.98828	3.48633	2.49023
0.498047	0.996094	4.48242	2.98828	3.48633	2.49023
0.498047	0.996094	4.48242	2.98828	3.48633	2.49023
0.498047	0.996094	4.48242	2.98828	3.48633	2.49023
0.498047	0.996094	4.48242	2.98828	3.48633	2.49023
0.498047	0.996094	4.48242	2.98828	3.48633	2.49023
0.498047	0.996094	4.48242	2.98828	3.48633	2.49023
0.498047	0.996094	4.48242	2.49023	3.48633	1.99219
0.498047	0.996094	4.48242	2.49023	3.48633	1.99219
0.498047	0.996094	4.48242	2.49023	3.48633	1.99219
0.498047	0.996094	3.98438	2.49023	3.48633	1.99219
0.498047	0.996094	3.98438	2.49023	3.48633	1.99219
0.498047	0.996094	3.98438	2.49023	2.98828	1.99219
0.498047	0.996094	3.98438	2.49023	2.98828	1.99219
0.498047	0.996094	3.98438	2.49023	2.98828	1.99219
0.498047	0.996094	3.98438	2.49023	2.98828	1.99219
0.498047	0.498047	3.98438	1.99219	2.98828	1.99219
0.498047	0.498047	3.98438	1.99219	2.98828	1.99219
0.498047	0.498047	3.98438	1.99219	2.98828	1.99219
0.498047	0.498047	3.48633	1.99219	2.98828	1.99219
0.498047	0.498047	3.48633	1.99219	2.98828	1.99219
0.498047	0.498047	3.48633	1.99219	2.98828	1.99219
0.498047	0.498047	3.48633	1.99219	2.98828	1.99219
0.498047	0.498047	3.48633	1.99219	2.98828	1.49414
0.498047	0.498047	3.48633	1.99219	2.98828	1.49414
0.498047	0.498047	3.48633	1.99219	2.98828	1.49414
	0.498047	3.48633	1.99219	2.98828	1.49414
	0.498047	3.48633	1.99219	2.98828	1.49414
	0.498047	3.48633	1.99219	2.98828	1.49414
	0.498047	3.48633	1.99219	2.49023	1.49414
	0.498047	3.48633	1.99219	2.49023	1.49414
	0.498047	3.48633	1.99219	2.49023	1.49414
	0.498047	3.48633	1.99219	2.49023	1.49414
	0.498047	2.98828	1.49414	2.49023	1.49414
	0.498047	2.98828	1.49414	2.49023	1.49414
	0.498047	2.98828	1.49414	2.49023	1.49414
	0.498047	2.98828	1.49414	2.49023	1.49414
	0.498047	2.98828	1.49414	2.49023	1.49414
	0.498047	2.98828	1.49414	2.49023	1.49414
	0.498047	2.98828	1.49414	2.49023	1.49414
	0.498047	2.98828	1.49414	2.49023	1.49414
	0.498047	2.98828	1.49414	2.49023	1.49414
	0.498047	2.98828	1.49414	2.49023	1.49414
	0.498047	2.49023	1.49414	2.49023	1.49414
	0.498047	2.49023	1.49414	2.49023	1.49414
	0.498047	2.49023	1.49414	2.49023	0.996094
	0.498047	2.49023	1.49414	2.49023	0.996094
	0.498047	2.49023	1.49414	2.49023	0.996094
	0.498047	2.49023	1.49414	2.49023	0.996094
	0.498047	2.49023	1.49414	2.49023	0.996094
	0.498047	2.49023	1.49414	1.99219	0.996094
	0.498047	2.49023	1.49414	1.99219	0.996094
	0.498047	2.49023	1.49414	1.99219	0.996094
	0.498047	2.49023	1.49414	1.99219	0.996094
	0.498047	2.49023	1.49414	1.99219	0.996094
	0.498047	2.49023	1.49414	1.99219	0.996094
	0.498047	1.99219	1.49414	1.99219	0.996094
	0.498047	1.99219	1.49414	1.99219	0.996094
	0.498047	1.99219	1.49414	1.99219	0.996094
	0.498047	1.99219	1.49414	1.99219	0.996094
	0.498047	1.99219	1.49414	1.99219	0.996094
	0.498047	1.99219	1.49414	1.99219	0.996094
	0.498047	1.99219	1.49414	1.99219	0.996094
	0.498047	1.99219	1.49414	1.99219	0.996094
	0.498047	1.99219	0.996094	1.99219	0.996094
	0.498047	1.99219	0.996094	1.99219	0.996094
	0.498047	1.99219	0.996094	1.99219	0.996094
	0.498047	1.99219	0.996094	1.99219	0.996094
	0.498047	1.99219	0.996094	1.99219	0.996094
	0.498047	1.99219	0.996094	1.49414	0.996094
	0.498047	1.99219	0.996094	1.49414	0.996094
	0.498047	1.99219	0.996094	1.49414	0.996094
	0.498047	1.99219	0.996094	1.49414	0.996094
	0.498047	1.99219	0.996094	1.49414	0.996094
	0.498047	1.99219	0.996094	1.49414	0.996094
	0.498047	1.99219	0.996094	1.49414	0.996094
	0.498047	1.99219	0.996094	1.49414	0.996094
		1.99219	0.996094	1.49414	0.996094
		1.49414	0.996094	1.49414	0.996094
		1.49414	0.996094	1.49414	0.498047
		1.49414	0.996094	1.49414	0.498047
		1.49414	0.996094	1.49414	0.498047
		1.49414	0.996094	1.49414	0.498047
		1.49414	0.996094	1.49414	0.498047
		1.49414	0.996094	1.49414	0.498047
		1.49414	0.996094	1.49414	0.498047
		1.49414	0.996094	1.49414	0.498047
		1.49414	0.996094	1.49414	0.498047
		1.49414	0.996094	1.49414	0.498047
		1.49414	0.996094	1.49414	0.498047
		1.49414	0.996094	1.49414	0.498047
		1.49414	0.996094	1.49414	0.498047
		1.49414	0.996094	1.49414	0.498047
		1.49414	0.996094	1.49414	0.498047
		1.49414	0.996094	1.49414	0.498047
		1.49414	0.996094	1.49414	0.498047
		1.49414	0.996094	1.49414	0.498047
		1.49414	0.498047	1.49414	0.498047
		1.49414	0.498047	1.49414	0.498047
		1.49414	0.498047	1.49414	0.498047
		0.996094	0.498047	1.49414	0.498047
		0.996094	0.498047	1.49414	0.498047
		0.996094	0.498047	1.49414	0.498047
		0.996094	0.498047	1.49414	0.498047
		0.996094	0.498047	1.49414	0.498047
		0.996094	0.498047	1.49414	0.498047
		0.996094	0.498047	1.49414	0.498047
		0.996094	0.498047	0.996094	0.498047
		0.996094	0.498047	0.996094	0.498047
		0.996094	0.498047	0.996094	0.498047
		0.996094	0.498047	0.996094	0.498047
		0.996094	0.498047	0.996094	0.498047
		0.996094	0.498047	0.996094
		0.996094	0.498047	0.996094
		0.996094	0.498047	0.996094
		0.996094	0.498047	0.996094
		0.996094	0.498047	0.996094
		0.996094	0.498047	0.996094
		0.996094	0.498047	0.996094
		0.996094	0.498047	0.996094
		0.996094	0.498047	0.996094
		0.996094	0.498047	0.996094
		0.996094	0.498047	0.996094
		0.996094	0.498047	0.996094
		0.996094	0.498047	0.996094
		0.996094	0.498047	0.996094
		0.996094	0.498047	0.996094
		0.996094	0.498047	0.996094
		0.996094	0.498047	0.996094
		0.996094	0.498047	0.996094
		0.996094	0.498047	0.996094
		0.996094	0.498047	0.996094
		0.996094	0.498047	0.996094
		0.996094	0.498047	0.996094
		0.996094	0.498047	0.996094
		0.498047	0.498047	0.996094
		0.498047	0.498047	0.996094
		0.498047	0.498047	0.996094
		0.498047	0.498047	0.996094
		0.498047	0.498047	0.996094
		0.498047	0.498047	0.996094
		0.498047	0.498047	0.996094
		0.498047	0.498047	0.996094
		0.498047	0.498047	0.996094
		0.498047	0.498047	0.498047
		0.498047	0.498047	0.498047
		0.498047	0.498047	0.498047
		0.498047	0.498047	0.498047
		0.498047	0.498047	0.498047
		0.498047	0.498047	0.498047
		0.498047	0.498047	0.498047
		0.498047	0.498047	0.498047
		0.498047		0.498047
		0.498047		0.498047
		0.498047		0.498047
		0.498047		0.498047
		0.498047		0.498047
		0.498047		0.498047
		0.498047		0.498047
		0.498047		0.498047
		0.498047		0.498047
		0.498047		0.498047
		0.498047		0.498047
		0.498047		0.498047
		0.498047		0.498047
		0.498047		0.498047
		0.498047		0.498047
		0.498047		0.498047
		0.498047		0.498047
		0.498047		0.498047
		0.498047		0.498047
		0.498047		0.498047
		0.498047		0.498047
		0.498047		0.498047
		0.498047		0.498047
		0.498047		0.498047
		0.498047		0.498047
		0.498047		0.498047
		0.498047		0.498047
				0.498047
				0.498047
				0.498047
				0.498047
				0.498047
				0.498047
				0.498047
				0.498047
				0.498047
				0.498047
				0.498047
				0.498047
				0.498047
				0.498047

## Sheet: Fig. 1d
Figure 1D
	DMSO			BAPTA-AM
BSA	5.30677	5.46002	5.3834	15.3211	11.3958	13.3585
PA	4.17047	4.20951	4.18999	10.0502	15.4657	12.7579
LPS	1263.53	1311.41	1287.47	552.977	593.394	573.186
L+P	3296.2	3138.11	3217.16	744.429	813.768	779.098

## Sheet: Fig. 1e
Figure 1E
	DMSO			MitoTEMPOL
BSA	3.33735	3.64354	3.49045	4.61652	4.94997	4.78325
PA	9.8805	9.70349	9.79199	5.90622	5.70969	5.80796
LPS	123.494	110.972	117.233	1201.57	1032.82	1117.2
L+P	4703.03	4868.26	4785.65	3344.59	2910.35	3127.47
