# Supplementary material for: ER-to-lysosome Ca2+ refilling followed by K+ efflux-coupled store-operated Ca2+ entry in inflammasome activation and metabolic inflammation
Source: eLife. 2024 Jul 2;12:RP87561. doi: 10.7554/eLife.87561 (PMC11219040; doi:10.7554/eLife.87561)
Supplement: Figure 2—figure supplement 1—source data 1. [file elife-87561-fig2-figsupp1-data1.xlsx]

## Sheet: Figure2-figure supplement1
Figure2-figure supplement 1B
	DMSO			apigenin			quercetin
BSA	0	0	0	0	0	0	35.9898	0	17.9949
LPS	960.167	934.799	947.483	1949.64	1993.77	1971.7	74.3237	100.2	87.2619
L+P	13030.1	11028.1	12029.1	4978.13	4918.78	4948.45	1173.22	1297.21	1235.22
Figure2-figure supplement 1C
Fluo-3 left																		Fura2 right
BSA				L+P				L+P:apigenin				L+P:quercetin						BSA	L+P	L+P:apigenin	L+P:quercertin
21.9141	18.9258	15.4395	21.9141	40.3418	44.8242	50.3027	75.2051	42.832	48.8086	45.8203	28.8867	44.3262	35.8594	58.2715	31.377			31.6554	65.6795	24.6604	31.6554
19.9219	17.9297	15.4395	21.416	39.8438	44.8242	47.8125	72.7148	42.334	47.8125	44.8242	26.3965	42.832	33.8672	57.2754	28.8867			28.1201	66.9237	31.7574	28.1201
19.9219	16.4355	15.4395	20.4199	38.8477	43.3301	46.8164	71.2207	40.8398	46.8164	41.8359	26.3965	42.334	32.8711	57.2754	28.3887			31.2299	67.9762	29.9379	31.2299
19.9219	14.9414	15.4395	20.4199	37.3535	41.8359	45.3223	71.2207	40.8398	46.8164	40.8398	26.3965	41.8359	32.373	56.2793	27.3926			33.4158	68.6075	25.8954	33.4158
18.9258	14.9414	14.9414	20.4199	36.3574	41.8359	44.8242	70.7227	40.3418	46.8164	40.3418	25.8984	40.8398	31.377	56.2793	26.8945			29.0013	69.8402	21.1578	29.0013
18.9258	13.4473	14.9414	19.9219	36.3574	41.3379	44.8242	68.2324	39.8438	45.8203	40.3418	25.4004	40.8398	31.377	55.2832	26.3965			37.0004	70.2976	26.1736	37.0004
18.4277	12.9492	14.9414	19.4238	36.3574	39.8438	43.8281	68.2324	39.3457	45.3223	39.3457	24.9023	40.3418	28.8867	52.793	25.8984			34.5069	66.9886	30.3263	34.5069
18.4277	12.9492	14.9414	19.4238	36.3574	38.8477	43.3301	67.7344	39.3457	45.3223	38.3496	24.9023	39.8438	28.3887	51.2988	25.8984			34.2293	71.9414	28.0606	34.2293
18.4277	12.9492	14.9414	19.4238	35.8594	38.8477	42.832	67.7344	39.3457	43.8281	37.8516	24.4043	38.3496	27.8906	51.2988	25.8984			23.1995	72.7688	31.4816	23.1995
17.9297	12.9492	14.9414	18.9258	35.3613	38.3496	42.832	64.7461	39.3457	43.8281	37.8516	23.4082	37.3535	27.3926	50.3027	25.8984			33.729	73.0844	35.1591	33.729
17.9297	12.4512	14.4434	18.9258	34.8633	37.3535	42.334	64.7461	38.3496	42.832	36.3574	23.4082	37.3535	27.3926	49.3066	25.8984			35.002	73.4463	33.0608	35.002
17.9297	12.4512	14.4434	18.4277	33.8672	37.3535	42.334	64.7461	38.3496	42.832	35.8594	23.4082	37.3535	26.3965	49.3066	25.8984			36.6303	72.506	36.6546	36.6303
17.9297	12.4512	14.4434	18.4277	33.8672	36.8555	42.334	62.7539	37.8516	41.8359	35.8594	23.4082	36.8555	26.3965	47.8125	25.4004			34.5733	75.0552	31.6255	34.5733
17.4316	12.4512	13.9453	17.9297	33.8672	35.8594	42.334	62.2559	37.8516	41.8359	35.8594	22.9102	36.3574	26.3965	47.8125	24.9023				73.0515	33.6507
17.4316	11.9531	13.9453	17.9297	33.8672	35.8594	41.8359	60.7617	37.3535	40.8398	34.8633	22.9102	36.3574	26.3965	46.8164	24.9023				70.0884	30.6852
17.4316	11.9531	13.9453	16.4355	32.373	35.8594	41.3379	60.2637	37.3535	40.3418	33.3691	22.4121	36.3574	25.8984	46.3184	24.9023				75.4253	36.8912
17.4316	11.9531	13.9453	16.4355	31.377	35.8594	41.3379	59.7656	36.8555	40.3418	33.3691	22.4121	35.8594	25.8984	45.8203	24.9023					33.7471
16.9336	11.9531	13.9453	16.4355	31.377	35.3613	41.3379	59.7656	36.3574	39.3457	33.3691	21.416	35.8594	24.9023	45.8203	24.9023					32.7661
16.9336	11.9531	13.4473	15.9375	30.8789	35.3613	40.8398	59.7656	35.8594	39.3457	32.8711	21.416	35.8594	24.9023	45.3223	24.9023					37.0126
16.4355	11.9531	12.4512	15.4395	30.3809	35.3613	40.3418	58.7695	35.3613	37.8516	32.8711	20.918	35.3613	24.4043	44.3262	24.9023					39.5632
16.4355	11.9531	12.4512	14.9414	30.3809	34.8633	40.3418	58.2715	35.3613	37.3535	32.8711	20.918	35.3613	24.4043	44.3262	24.9023
16.4355	11.4551	11.9531	14.9414	29.8828	34.8633	39.8438	58.2715	35.3613	37.3535	31.875	20.4199	35.3613	23.9062	43.8281	24.4043
15.9375	11.4551	11.4551	14.9414	29.8828	34.8633	39.3457	57.7734	34.8633	37.3535	31.875	20.4199	33.8672	23.4082	43.3301	24.4043
15.9375	11.4551	11.4551	14.4434	29.8828	34.8633	38.8477	57.7734	34.8633	35.3613	31.377	20.4199	33.8672	23.4082	43.3301	24.4043
15.9375	11.4551	11.4551	14.4434	29.8828	34.8633	38.8477	57.7734	34.8633	35.3613	31.377	20.4199	33.8672	22.9102	43.3301	24.4043
15.4395	11.4551	10.957	13.4473	29.8828	34.8633	38.3496	57.2754	34.8633	33.8672	31.377	20.4199	33.8672	22.9102	42.832	24.4043
15.4395	11.4551	10.957	13.4473	29.3848	34.8633	37.8516	57.2754	34.3652	32.8711	31.377	19.4238	33.8672	22.4121	42.832	24.4043
14.9414	11.4551	10.957	13.4473	29.3848	34.3652	37.8516	56.7773	34.3652	32.8711	31.377	18.9258	32.8711	22.4121	42.334	24.4043
14.9414	10.957	10.957	12.9492	29.3848	34.3652	37.8516	56.7773	33.3691	32.8711	31.377	18.9258	32.373	21.9141	41.8359	23.9062
14.9414	10.957	10.957	12.9492	29.3848	34.3652	37.3535	56.2793	32.8711	32.373	30.8789	17.9297	31.875	21.9141	41.8359	23.9062
14.4434	10.957	10.957	12.9492	29.3848	34.3652	37.3535	56.2793	32.8711	32.373	30.8789	17.9297	31.875	21.9141	41.3379	23.4082
14.4434	10.957	10.459	12.4512	28.8867	33.8672	37.3535	56.2793	32.8711	32.373	30.8789	17.4316	31.377	21.9141	40.8398	22.9102
13.9453	10.957	10.459	12.4512	28.8867	33.8672	37.3535	56.2793	31.875	31.875	30.8789	17.4316	30.8789	21.9141	40.8398	22.9102
13.9453	10.459	10.459	11.9531	28.8867	33.8672	36.8555	55.7812	31.875	31.875	30.8789	17.4316	30.8789	21.416	40.8398	22.9102
13.4473	10.459	10.459	11.9531	28.8867	33.3691	36.8555	55.7812	31.875	31.377	30.3809	17.4316	29.3848	21.416	40.8398	22.9102
13.4473	10.459	9.96094	11.9531	28.3887	33.3691	36.3574	55.2832	31.875	31.377	30.3809	17.4316	29.3848	21.416	40.3418	22.9102
13.4473	10.459	9.96094	11.4551	28.3887	33.3691	36.3574	55.2832	31.377	30.8789	30.3809	17.4316	29.3848	21.416	40.3418	22.9102
12.9492	9.96094	9.96094	11.4551	28.3887	33.3691	36.3574	54.2871	30.8789	30.8789	30.3809	17.4316	28.8867	21.416	39.8438	22.4121
12.4512	9.96094	9.96094	11.4551	27.8906	32.8711	36.3574	54.2871	30.8789	30.8789	29.8828	16.9336	28.3887	20.918	39.8438	22.4121
12.4512	9.96094	9.96094	11.4551	27.8906	32.8711	36.3574	54.2871	30.3809	30.8789	29.8828	16.9336	28.3887	20.918	39.8438	22.4121
12.4512	9.96094	9.96094	11.4551	27.8906	32.8711	35.8594	54.2871	29.8828	30.8789	29.8828	16.9336	28.3887	20.918	39.3457	22.4121
12.4512	9.96094	9.96094	10.957	27.8906	32.8711	35.3613	53.7891	29.3848	30.3809	29.8828	16.9336	27.3926	20.918	38.8477	22.4121
12.4512	9.96094	9.46289	10.957	27.8906	32.8711	35.3613	53.7891	28.8867	29.8828	29.8828	16.4355	27.3926	20.918	38.3496	21.9141
11.9531	9.46289	9.46289	10.957	27.3926	32.8711	34.8633	53.291	28.8867	29.3848	29.8828	16.4355	27.3926	20.918	38.3496	21.9141
11.9531	9.46289	9.46289	10.957	27.3926	32.373	34.8633	53.291	28.3887	29.3848	29.3848	16.4355	26.8945	20.4199	38.3496	21.9141
11.9531	9.46289	9.46289	10.957	27.3926	32.373	34.8633	53.291	28.3887	29.3848	29.3848	16.4355	26.8945	20.4199	37.8516	21.9141
11.9531	9.46289	9.46289	10.957	27.3926	32.373	34.3652	52.793	28.3887	28.8867	29.3848	16.4355	26.8945	20.4199	37.8516	21.9141
11.4551	9.46289	9.46289	10.459	27.3926	32.373	34.3652	51.2988	27.8906	28.8867	29.3848	16.4355	26.3965	20.4199	37.8516	21.9141
11.4551	9.46289	9.46289	10.459	26.8945	32.373	34.3652	51.2988	27.8906	28.3887	29.3848	16.4355	26.3965	19.9219	37.8516	21.416
11.4551	9.46289	9.46289	10.459	26.8945	32.373	34.3652	50.8008	27.3926	28.3887	28.8867	16.4355	26.3965	19.9219	37.8516	21.416
11.4551	9.46289	9.46289	10.459	26.8945	32.373	33.8672	50.8008	27.3926	27.8906	28.8867	15.9375	24.9023	19.9219	37.8516	21.416
10.957	9.46289	9.46289	10.459	26.8945	32.373	33.8672	50.8008	27.3926	27.8906	28.3887	15.9375	24.9023	19.9219	37.3535	21.416
10.957	8.96484	9.46289	10.459	26.8945	32.373	33.8672	50.8008	27.3926	27.8906	28.3887	15.9375	24.9023	19.9219	36.8555	20.918
10.957	8.96484	9.46289	10.459	26.8945	31.875	33.3691	50.8008	27.3926	27.8906	28.3887	15.9375	24.9023	19.9219	36.8555	20.918
10.957	8.4668	9.46289	10.459	26.8945	31.875	33.3691	50.3027	26.8945	27.3926	28.3887	15.9375	24.4043	19.9219	36.8555	20.918
10.957	8.4668	9.46289	10.459	26.3965	31.875	33.3691	49.8047	26.8945	27.3926	28.3887	15.9375	24.4043	19.4238	36.8555	20.918
10.459	8.4668	8.96484	9.96094	26.3965	31.377	32.8711	48.8086	26.3965	27.3926	28.3887	15.9375	24.4043	19.4238	36.8555	20.918
10.459	8.4668	8.96484	9.96094	26.3965	31.377	32.8711	48.8086	26.3965	27.3926	27.8906	15.9375	24.4043	19.4238	36.3574	20.918
10.459	8.4668	8.96484	9.96094	26.3965	31.377	32.8711	48.3105	26.3965	26.8945	27.8906	15.4395	23.9062	19.4238	35.8594	20.4199
10.459	8.4668	8.96484	9.96094	26.3965	31.377	32.373	47.8125	25.8984	26.8945	27.8906	15.4395	23.9062	19.4238	35.8594	20.4199
10.459	7.96875	8.96484	9.96094	26.3965	31.377	32.373	47.8125	25.8984	26.3965	27.8906	15.4395	23.4082	19.4238	35.8594	20.4199
9.96094	7.96875	8.96484	9.96094	25.8984	31.377	32.373	46.8164	25.8984	26.3965	27.8906	15.4395	23.4082	18.9258	35.3613	19.9219
9.96094	7.96875	8.96484	9.96094	25.8984	31.377	32.373	46.3184	25.8984	26.3965	27.3926	15.4395	23.4082	18.9258	35.3613	19.9219
9.96094	7.96875	8.96484	9.46289	25.4004	30.8789	32.373	46.3184	25.8984	26.3965	27.3926	15.4395	23.4082	18.9258	34.8633	19.9219
9.96094	7.96875	8.4668	9.46289	25.4004	30.8789	31.875	45.3223	25.8984	26.3965	27.3926	15.4395	23.4082	18.4277	34.8633	19.9219
9.46289	7.96875	8.4668	9.46289	25.4004	30.3809	31.875	43.8281	25.4004	26.3965	27.3926	15.4395	22.9102	18.4277	34.8633	19.4238
9.46289	7.96875	8.4668	9.46289	25.4004	30.3809	31.875	43.8281	25.4004	26.3965	27.3926	15.4395	22.9102	18.4277	34.8633	19.4238
9.46289	7.96875	8.4668	9.46289	25.4004	30.3809	31.875	43.8281	25.4004	26.3965	27.3926	15.4395	22.9102	18.4277	34.8633	19.4238
9.46289	7.96875	8.4668	8.96484	25.4004	30.3809	31.875	43.8281	25.4004	26.3965	26.8945	15.4395	22.9102	18.4277	34.3652	18.9258
9.46289	7.96875	8.4668	8.96484	24.9023	29.8828	31.875	43.8281	25.4004	26.3965	26.8945	15.4395	22.9102	18.4277	34.3652	18.9258
9.46289	7.96875	8.4668	8.96484	24.9023	29.8828	31.875	43.8281	24.9023	25.8984	26.8945	15.4395	22.4121	18.4277	34.3652	18.9258
8.96484	7.96875	8.4668	8.96484	24.9023	29.3848	31.875	43.3301	24.9023	25.8984	26.8945	15.4395	22.4121	17.9297	33.8672	18.9258
8.96484	7.96875	8.4668	8.96484	24.9023	29.3848	31.377	42.832	24.9023	25.4004	26.8945	15.4395	22.4121	17.9297	33.8672	18.9258
8.96484	7.4707	8.4668	8.96484	24.9023	29.3848	31.377	42.832	24.4043	25.4004	26.3965	15.4395	22.4121	17.9297	33.8672	18.9258
8.96484	7.4707	8.4668	8.96484	24.4043	29.3848	31.377	41.8359	23.9062	25.4004	26.3965	14.9414	21.9141	17.9297	33.3691	18.9258
8.4668	7.4707	7.96875	8.96484	24.4043	29.3848	30.8789	41.8359	23.4082	25.4004	26.3965	14.9414	21.9141	17.9297	33.3691	18.9258
8.4668	7.4707	7.96875	8.96484	24.4043	29.3848	30.8789	41.3379	23.4082	25.4004	26.3965	14.9414	21.9141	17.9297	32.8711	18.4277
8.4668	7.4707	7.96875	8.4668	24.4043	29.3848	30.8789	41.3379	23.4082	25.4004	25.8984	14.9414	21.416	17.9297	32.8711	18.4277
8.4668	7.4707	7.96875	8.4668	23.9062	29.3848	30.8789	40.3418	23.4082	25.4004	25.8984	14.9414	21.416	17.9297	32.373	18.4277
8.4668	7.4707	7.96875	8.4668	23.4082	29.3848	30.8789	39.8438	22.9102	25.4004	25.4004	14.9414	21.416	17.9297	32.373	18.4277
7.96875	7.4707	7.96875	8.4668	23.4082	28.8867	30.3809	39.3457	22.9102	24.9023	25.4004	14.9414	21.416	17.9297	32.373	18.4277
7.96875	7.4707	7.96875	8.4668	23.4082	28.8867	30.3809	38.3496	22.4121	24.9023	25.4004	14.9414	20.918	17.9297	32.373	18.4277
7.96875	6.97266	7.96875	8.4668	23.4082	28.8867	29.8828	37.3535	22.4121	24.9023	25.4004	14.9414	20.918	17.9297	32.373	18.4277
7.96875	6.97266	7.4707	8.4668	22.9102	27.8906	29.8828	37.3535	22.4121	24.9023	25.4004	14.9414	20.918	17.4316	32.373	18.4277
7.96875	6.97266	7.4707	8.4668	22.9102	27.8906	29.8828	36.8555	22.4121	24.9023	24.9023	14.9414	20.4199	17.4316	31.875	18.4277
7.96875	6.97266	7.4707	8.4668	22.9102	27.8906	29.8828	36.3574	21.9141	24.9023	24.9023	14.9414	20.4199	17.4316	31.875	18.4277
7.4707	6.97266	7.4707	8.4668	22.9102	27.3926	29.3848	35.8594	21.9141	24.9023	24.4043	14.9414	20.4199	17.4316	31.875	17.9297
7.4707	6.97266	7.4707	8.4668	22.9102	27.3926	29.3848	35.3613	21.9141	24.4043	23.9062	14.9414	20.4199	17.4316	31.875	17.9297
7.4707	6.97266	7.4707	7.96875	22.9102	27.3926	29.3848	35.3613	21.416	24.4043	23.9062	14.9414	19.9219	17.4316	31.875	17.9297
7.4707	6.97266	7.4707	7.96875	22.4121	27.3926	29.3848	35.3613	21.416	24.4043	23.4082	14.9414	19.9219	17.4316	30.8789	17.9297
7.4707	6.97266	7.4707	7.96875	21.9141	27.3926	29.3848	34.8633	21.416	24.4043	23.4082	14.9414	19.9219	17.4316	30.8789	17.9297
7.4707	6.97266	7.4707	7.96875	21.9141	27.3926	29.3848	34.8633	21.416	24.4043	23.4082	14.4434	19.4238	17.4316	30.8789	17.4316
7.4707	6.97266	7.4707	7.96875	21.9141	26.8945	29.3848	34.8633	20.918	23.9062	22.9102	14.4434	19.4238	16.9336	30.8789	17.4316
7.4707	6.97266	7.4707	7.96875	21.9141	26.8945	29.3848	34.8633	20.918	23.9062	22.9102	14.4434	18.9258	16.9336	30.3809	17.4316
6.97266	6.47461	7.4707	7.96875	21.9141	26.8945	28.8867	34.3652	20.4199	23.4082	22.9102	14.4434	18.9258	16.9336	30.3809	17.4316
6.97266	6.47461	7.4707	7.96875	21.416	26.8945	28.8867	34.3652	20.4199	23.4082	22.9102	14.4434	18.4277	16.9336	29.8828	17.4316
6.97266	6.47461	7.4707	7.96875	21.416	26.8945	28.8867	33.8672	20.4199	23.4082	22.9102	14.4434	18.4277	16.9336	29.8828	17.4316
6.97266	6.47461	6.97266	7.96875	21.416	26.3965	28.8867	33.8672	20.4199	23.4082	22.4121	14.4434	18.4277	16.9336	29.8828	17.4316
6.97266	6.47461	6.97266	7.96875	21.416	26.3965	28.8867	33.8672	19.9219	23.4082	22.4121	14.4434	17.9297	16.4355	29.3848	17.4316
6.97266	6.47461	6.97266	7.4707	21.416	26.3965	28.8867	33.3691	19.9219	22.9102	21.9141	14.4434	17.9297	16.4355	29.3848	16.9336
6.97266	6.47461	6.97266	7.4707	21.416	26.3965	28.8867	33.3691	19.9219	22.9102	21.9141	14.4434	17.9297	16.4355	29.3848	16.9336
6.97266	6.47461	6.97266	7.4707	20.918	25.8984	28.8867	33.3691	19.9219	22.9102	21.9141	14.4434	17.9297	16.4355	28.8867	16.9336
6.97266	6.47461	6.97266	7.4707	20.918	25.8984	28.8867	33.3691	19.9219	22.9102	21.9141	14.4434	17.9297	16.4355	28.8867	16.9336
6.97266	6.47461	6.97266	7.4707	20.918	25.8984	28.3887	33.3691	19.4238	22.9102	21.416	14.4434	17.9297	16.4355	28.8867	16.9336
6.97266	6.47461	6.97266	7.4707	20.918	25.8984	28.3887	32.8711	19.4238	22.9102	20.918	14.4434	17.4316	16.4355	28.8867	16.9336
6.97266	5.97656	6.97266	6.97266	20.918	24.9023	28.3887	32.8711	19.4238	22.4121	20.918	14.4434	17.4316	16.4355	28.3887	16.9336
6.97266	5.97656	6.97266	6.97266	20.4199	24.9023	28.3887	32.373	19.4238	22.4121	20.918	14.4434	17.4316	16.4355	28.3887	16.9336
6.47461	5.97656	6.97266	6.97266	20.4199	24.9023	27.8906	32.373	19.4238	22.4121	20.918	14.4434	17.4316	15.9375	27.8906	16.4355
6.47461	5.97656	6.97266	6.97266	20.4199	24.4043	27.8906	32.373	19.4238	22.4121	20.918	14.4434	16.9336	15.9375	27.8906	16.4355
6.47461	5.97656	6.97266	6.97266	20.4199	24.4043	27.3926	31.875	19.4238	21.9141	20.918	14.4434	16.9336	15.9375	27.8906	16.4355
6.47461	5.97656	6.97266	6.97266	20.4199	24.4043	27.3926	31.875	19.4238	21.9141	20.918	14.4434	16.9336	15.9375	27.8906	15.9375
6.47461	5.97656	6.47461	6.97266	19.9219	24.4043	27.3926	31.875	19.4238	21.9141	20.4199	14.4434	16.9336	15.9375	27.8906	15.9375
6.47461	5.97656	6.47461	6.97266	19.9219	23.9062	27.3926	31.875	18.9258	21.9141	20.4199	13.9453	16.9336	15.9375	27.8906	15.9375
6.47461	5.97656	6.47461	6.97266	19.9219	23.9062	27.3926	31.377	18.9258	21.416	20.4199	13.9453	16.4355	15.9375	27.8906	15.9375
6.47461	5.97656	6.47461	6.97266	19.9219	23.9062	27.3926	31.377	18.9258	21.416	20.4199	13.9453	16.4355	15.9375	27.3926	15.9375
6.47461	5.97656	6.47461	6.97266	19.9219	23.9062	26.8945	30.8789	18.9258	21.416	19.4238	13.9453	16.4355	15.9375	27.3926	15.4395
6.47461	5.97656	6.47461	6.97266	19.4238	23.9062	26.8945	30.8789	18.9258	21.416	19.4238	13.9453	16.4355	15.9375	27.3926	15.4395
6.47461	5.97656	6.47461	6.97266	19.4238	23.9062	26.8945	30.3809	18.9258	21.416	19.4238	13.9453	15.9375	15.9375	27.3926	15.4395
6.47461	5.97656	6.47461	6.97266	19.4238	23.9062	26.8945	29.8828	18.4277	21.416	18.9258	13.9453	15.9375	15.4395	27.3926	15.4395
6.47461	5.97656	6.47461	6.97266	19.4238	23.9062	26.8945	29.8828	18.4277	21.416	18.9258	13.9453	15.4395	15.4395	27.3926	15.4395
6.47461	5.97656	6.47461	6.97266	19.4238	23.9062	26.8945	29.8828	18.4277	21.416	18.9258	13.9453	15.4395	15.4395	27.3926	15.4395
6.47461	5.97656	6.47461	6.97266	18.9258	23.9062	26.8945	29.8828	18.4277	20.918	18.9258	13.9453	15.4395	15.4395	27.3926	14.9414
5.97656	5.47852	5.97656	6.47461	18.9258	23.9062	26.3965	29.8828	17.9297	20.918	18.4277	13.9453	15.4395	15.4395	26.8945	14.9414
5.97656	5.47852	5.97656	6.47461	18.9258	23.4082	26.3965	29.8828	17.9297	20.918	18.4277	13.9453	14.9414	15.4395	26.8945	14.9414
5.97656	5.47852	5.97656	6.47461	18.9258	23.4082	25.8984	29.8828	17.4316	20.918	18.4277	13.9453	14.9414	15.4395	26.8945	14.9414
5.97656	5.47852	5.97656	6.47461	18.9258	23.4082	25.8984	29.8828	17.4316	20.918	18.4277	13.9453	14.9414	15.4395	26.8945	14.4434
5.97656	5.47852	5.97656	6.47461	18.9258	23.4082	25.8984	29.8828	17.4316	20.918	17.9297	13.9453	14.9414	15.4395	26.8945	14.4434
5.97656	5.47852	5.97656	6.47461	18.9258	23.4082	25.4004	29.8828	17.4316	20.918	17.9297	13.9453	14.9414	15.4395	26.8945	14.4434
5.97656	5.47852	5.97656	6.47461	18.9258	23.4082	25.4004	29.8828	17.4316	20.918	17.4316	13.9453	14.9414	15.4395	26.8945	14.4434
5.97656	5.47852	5.97656	6.47461	18.9258	23.4082	25.4004	29.3848	17.4316	20.918	17.4316	13.9453	14.4434	14.9414	26.8945	14.4434
5.97656	5.47852	5.97656	6.47461	18.4277	23.4082	25.4004	29.3848	17.4316	20.4199	16.9336	13.9453	14.4434	14.9414	26.8945	14.4434
5.47852	5.47852	5.97656	6.47461	18.4277	22.9102	24.9023	29.3848	17.4316	20.4199	16.4355	13.9453	14.4434	14.9414	26.3965	13.9453
5.47852	5.47852	5.97656	6.47461	18.4277	22.9102	24.9023	29.3848	17.4316	20.4199	15.9375	13.9453	14.4434	14.9414	26.3965	13.9453
5.47852	5.47852	5.97656	6.47461	17.9297	22.9102	24.9023	28.8867	17.4316	20.4199	15.9375	13.9453	13.9453	14.9414	26.3965	13.9453
5.47852	5.47852	5.97656	6.47461	17.9297	22.9102	24.9023	28.8867	16.9336	20.4199	15.4395	13.4473	13.9453	14.4434	26.3965	13.9453
5.47852	5.47852	5.97656	6.47461	17.9297	22.9102	24.9023	28.3887	16.9336	20.4199	15.4395	13.4473	13.9453	14.4434	26.3965	13.9453
5.47852	5.47852	5.97656	6.47461	17.9297	22.4121	24.9023	28.3887	16.9336	20.4199	15.4395	13.4473	13.9453	14.4434	26.3965	13.9453
5.47852	5.47852	5.97656	6.47461	17.9297	22.4121	24.4043	27.3926	16.9336	19.9219	15.4395	13.4473	13.4473	14.4434	26.3965	13.9453
5.47852	5.47852	5.97656	6.47461	17.9297	22.4121	24.4043	26.8945	16.9336	19.9219	14.9414	13.4473	13.4473	14.4434	26.3965	13.9453
5.47852	5.47852	5.97656	5.97656	17.9297	22.4121	24.4043	26.8945	16.9336	19.4238	14.9414	13.4473	13.4473	14.4434	25.8984	13.4473
5.47852	5.47852	5.47852	5.97656	17.4316	22.4121	24.4043	26.8945	16.4355	19.4238	14.9414	13.4473	13.4473	14.4434	25.8984	13.4473
5.47852	5.47852	5.47852	5.97656	17.4316	21.9141	24.4043	26.8945	16.4355	19.4238	14.9414	13.4473	13.4473	14.4434	25.8984	13.4473
5.47852	4.98047	5.47852	5.97656	16.9336	21.9141	23.9062	26.8945	16.4355	19.4238	14.9414	13.4473	13.4473	14.4434	25.8984	13.4473
5.47852	4.98047	5.47852	5.97656	16.9336	21.9141	23.9062	26.3965	16.4355	19.4238	14.9414	13.4473	13.4473	14.4434	25.8984	13.4473
5.47852	4.98047	5.47852	5.97656	16.9336	21.9141	23.9062	26.3965	16.4355	19.4238	14.9414	13.4473	13.4473	14.4434	25.8984	13.4473
5.47852	4.98047	5.47852	5.97656	16.9336	21.416	23.9062	25.8984	15.9375	19.4238	14.4434	13.4473	13.4473	14.4434	25.8984	12.9492
4.98047	4.98047	5.47852	5.97656	16.4355	21.416	23.9062	25.8984	15.9375	18.9258	13.9453	13.4473	13.4473	13.9453	25.8984	12.9492
4.98047	4.98047	5.47852	5.97656	16.4355	20.918	23.4082	25.8984	15.9375	18.9258	13.9453	13.4473	12.9492	13.9453	25.8984	12.9492
4.98047	4.98047	5.47852	5.47852	16.4355	20.918	23.4082	25.8984	15.9375	18.9258	13.9453	13.4473	12.9492	13.9453	25.4004	12.9492
4.98047	4.98047	5.47852	5.47852	16.4355	20.918	23.4082	25.8984	15.9375	18.9258	13.9453	13.4473	12.9492	13.9453	25.4004	12.9492
4.98047	4.98047	5.47852	5.47852	16.4355	20.918	23.4082	25.4004	15.9375	18.9258	13.9453	12.9492	12.9492	13.9453	25.4004	12.9492
4.98047	4.98047	5.47852	5.47852	16.4355	20.918	23.4082	25.4004	15.9375	18.9258	13.9453	12.9492	12.9492	13.9453	24.9023	12.9492
4.98047	4.98047	5.47852	5.47852	16.4355	20.4199	23.4082	25.4004	15.9375	18.9258	13.9453	12.9492	12.9492	13.9453	24.9023	12.4512
4.98047	4.98047	5.47852	5.47852	16.4355	20.4199	23.4082	25.4004	15.4395	18.9258	13.4473	12.9492	12.9492	13.9453	24.4043	12.4512
4.98047	4.98047	5.47852	5.47852	15.9375	20.4199	22.9102	25.4004	15.4395	18.4277	13.4473	12.9492	12.4512	13.9453	24.4043	12.4512
4.98047	4.98047	5.47852	5.47852	15.9375	20.4199	22.9102	25.4004	15.4395	18.4277	12.9492	12.9492	12.4512	13.9453	24.4043	12.4512
4.98047	4.98047	5.47852	5.47852	15.9375	20.4199	22.9102	25.4004	15.4395	18.4277	12.9492	12.9492	12.4512	13.4473	24.4043	11.9531
4.98047	4.98047	4.98047	5.47852	15.9375	20.4199	22.9102	25.4004	15.4395	18.4277	12.4512	12.9492	12.4512	13.4473	24.4043	11.9531
4.98047	4.98047	4.98047	5.47852	15.9375	20.4199	22.9102	24.9023	15.4395	17.9297	12.4512	12.9492	12.4512	13.4473	24.4043	11.9531
4.98047	4.98047	4.98047	5.47852	15.4395	20.4199	22.9102	24.9023	15.4395	17.9297	11.9531	12.9492	11.9531	13.4473	24.4043	11.9531
4.98047	4.98047	4.98047	5.47852	15.4395	19.9219	22.9102	24.9023	15.4395	17.9297	11.9531	12.9492	11.9531	13.4473	24.4043	11.9531
4.48242	4.98047	4.98047	5.47852	15.4395	19.9219	22.4121	24.9023	15.4395	17.9297	11.9531	12.9492	11.9531	13.4473	24.4043	11.9531
4.48242	4.48242	4.98047	4.98047	15.4395	19.9219	22.4121	24.9023	15.4395	17.9297	11.9531	12.9492	11.9531	13.4473	23.9062	11.4551
4.48242	4.48242	4.98047	4.98047	15.4395	19.9219	21.9141	24.9023	14.9414	17.9297	11.4551	12.9492	11.9531	13.4473	23.9062	11.4551
4.48242	4.48242	4.98047	4.98047	15.4395	19.9219	21.9141	24.4043	14.9414	17.4316	11.4551	12.9492	11.4551	13.4473	23.9062	11.4551
4.48242	4.48242	4.98047	4.98047	15.4395	19.9219	21.9141	24.4043	14.9414	16.9336	11.4551	12.9492	11.4551	13.4473	23.9062	11.4551
4.48242	4.48242	4.98047	4.98047	15.4395	19.4238	21.9141	24.4043	14.9414	16.9336	11.4551	12.9492	11.4551	13.4473	23.4082	11.4551
4.48242	4.48242	4.98047	4.98047	15.4395	19.4238	21.416	24.4043	14.9414	16.9336	10.957	12.9492	11.4551	13.4473	23.4082	11.4551
4.48242	4.48242	4.98047	4.98047	14.9414	19.4238	21.416	24.4043	14.9414	16.9336	10.957	12.9492	11.4551	13.4473	23.4082	11.4551
4.48242	4.48242	4.98047	4.98047	14.9414	19.4238	21.416	24.4043	14.9414	16.4355	10.957	12.9492	10.957	13.4473	23.4082	11.4551
4.48242	4.48242	4.98047	4.98047	14.9414	19.4238	21.416	24.4043	14.9414	16.4355	10.957	12.9492	10.957	13.4473	23.4082	11.4551
4.48242	4.48242	4.98047	4.98047	14.9414	19.4238	21.416	24.4043	14.9414	16.4355	10.957	12.9492	10.957	13.4473	23.4082	11.4551
4.48242	4.48242	4.98047	4.98047	14.9414	19.4238	21.416	24.4043	14.9414	16.4355	10.459	12.4512	10.957	12.9492	23.4082	11.4551
4.48242	4.48242	4.98047	4.98047	14.9414	19.4238	21.416	24.4043	14.9414	16.4355	10.459	12.4512	10.957	12.9492	22.9102	11.4551
4.48242	4.48242	4.48242	4.98047	14.4434	19.4238	21.416	23.9062	14.9414	15.9375	10.459	12.4512	10.957	12.9492	22.9102	10.957
4.48242	4.48242	4.48242	4.98047	14.4434	18.9258	21.416	23.9062	14.4434	15.9375	10.459	12.4512	10.957	12.9492	22.9102	10.957
4.48242	4.48242	4.48242	4.98047	14.4434	18.9258	20.918	23.4082	14.4434	15.9375	10.459	12.4512	10.957	12.9492	22.9102	10.957
4.48242	4.48242	4.48242	4.98047	14.4434	18.9258	20.918	23.4082	14.4434	15.9375	9.96094	12.4512	10.957	12.9492	22.4121	10.957
4.48242	4.48242	4.48242	4.98047	14.4434	18.9258	20.918	23.4082	14.4434	15.9375	9.96094	12.4512	10.957	12.9492	22.4121	10.459
4.48242	3.98438	4.48242	4.98047	14.4434	18.9258	20.918	23.4082	14.4434	15.9375	9.96094	12.4512	10.957	12.9492	22.4121	10.459
4.48242	3.98438	4.48242	4.98047	14.4434	18.9258	20.918	23.4082	14.4434	15.9375	9.96094	12.4512	10.459	12.9492	22.4121	10.459
4.48242	3.98438	4.48242	4.98047	13.9453	18.9258	20.4199	23.4082	14.4434	15.4395	9.96094	12.4512	10.459	12.9492	22.4121	10.459
4.48242	3.98438	4.48242	4.48242	13.9453	18.9258	20.4199	22.9102	14.4434	15.4395	9.96094	12.4512	10.459	12.9492	22.4121	10.459
3.98438	3.98438	4.48242	4.48242	13.9453	18.9258	20.4199	22.9102	14.4434	15.4395	9.46289	12.4512	10.459	12.9492	21.9141	10.459
3.98438	3.98438	4.48242	4.48242	13.9453	18.4277	20.4199	22.4121	13.9453	15.4395	8.96484	12.4512	10.459	12.4512	21.9141	9.96094
3.98438	3.98438	4.48242	4.48242	13.9453	18.4277	20.4199	22.4121	13.9453	15.4395	8.96484	12.4512	10.459	12.4512	21.9141	9.96094
3.98438	3.98438	4.48242	4.48242	13.9453	18.4277	20.4199	22.4121	13.9453	15.4395	8.96484	12.4512	10.459	12.4512	21.9141	9.96094
3.98438	3.98438	4.48242	4.48242	13.9453	18.4277	19.9219	22.4121	13.9453	15.4395	8.96484	12.4512	10.459	12.4512	21.9141	9.96094
3.98438	3.98438	4.48242	4.48242	13.9453	18.4277	19.9219	22.4121	13.4473	14.9414	8.96484	12.4512	10.459	12.4512	21.9141	9.46289
3.98438	3.98438	4.48242	4.48242	13.9453	18.4277	19.9219	22.4121	13.4473	14.9414	8.96484	12.4512	10.459	12.4512	21.9141	9.46289
3.98438	3.98438	4.48242	4.48242	13.9453	18.4277	19.9219	21.9141	13.4473	14.9414	8.96484	12.4512	10.459	12.4512	21.416	9.46289
3.98438	3.98438	4.48242	4.48242	13.4473	18.4277	19.9219	21.9141	13.4473	14.9414	8.96484	12.4512	9.96094	12.4512	21.416	9.46289
3.98438	3.98438	4.48242	4.48242	13.4473	17.9297	19.4238	21.9141	13.4473	14.4434	8.96484	11.9531	9.96094	12.4512	21.416	9.46289
3.98438	3.98438	4.48242	4.48242	13.4473	17.9297	19.4238	21.9141	13.4473	13.9453	8.4668	11.9531	9.96094	12.4512	21.416	9.46289
3.98438	3.98438	4.48242	4.48242	13.4473	17.9297	19.4238	21.9141	12.9492	13.9453	8.4668	11.9531	9.96094	12.4512	21.416	9.46289
3.48633	3.98438	4.48242	4.48242	13.4473	17.9297	19.4238	21.9141	12.9492	13.4473	8.4668	11.9531	9.96094	11.9531	20.918	9.46289
3.48633	3.98438	4.48242	4.48242	13.4473	17.9297	19.4238	21.9141	12.9492	13.4473	8.4668	11.9531	9.96094	11.9531	20.4199	9.46289
3.48633	3.98438	4.48242	4.48242	13.4473	17.9297	19.4238	21.9141	12.9492	13.4473	8.4668	11.9531	9.96094	11.9531	20.4199	8.96484
3.48633	3.98438	4.48242	4.48242	13.4473	17.9297	19.4238	21.9141	12.9492	13.4473	7.96875	11.9531	9.96094	11.9531	19.9219	8.96484
3.48633	3.98438	4.48242	4.48242	13.4473	17.9297	19.4238	21.9141	12.9492	13.4473	7.96875	11.9531	9.96094	11.9531	19.9219	8.96484
3.48633	3.98438	4.48242	3.98438	13.4473	17.4316	19.4238	21.416	12.9492	12.9492	7.96875	11.9531	9.46289	11.9531	19.9219	8.96484
3.48633	3.48633	3.98438	3.98438	13.4473	17.4316	19.4238	21.416	12.9492	12.9492	7.96875	11.9531	9.46289	11.9531	19.9219	8.96484
3.48633	3.48633	3.98438	3.98438	12.9492	17.4316	18.9258	21.416	12.9492	12.9492	7.96875	11.9531	9.46289	11.9531	19.9219	8.96484
3.48633	3.48633	3.98438	3.98438	12.9492	17.4316	18.9258	21.416	12.4512	12.9492	7.96875	11.9531	9.46289	11.9531	19.4238	8.96484
3.48633	3.48633	3.98438	3.98438	12.9492	17.4316	18.9258	21.416	12.4512	12.9492	7.96875	11.9531	8.96484	11.4551	19.4238	8.96484
3.48633	3.48633	3.98438	3.98438	12.9492	17.4316	18.9258	21.416	12.4512	12.9492	7.96875	11.9531	8.96484	11.4551	19.4238	8.96484
3.48633	3.48633	3.98438	3.98438	12.9492	16.9336	18.9258	21.416	12.4512	12.4512	7.96875	11.9531	8.96484	11.4551	19.4238	8.96484
3.48633	3.48633	3.98438	3.98438	12.9492	16.9336	18.9258	21.416	12.4512	12.4512	7.4707	11.4551	8.96484	11.4551	19.4238	8.96484
3.48633	3.48633	3.98438	3.98438	12.9492	16.9336	18.9258	21.416	12.4512	12.4512	7.4707	11.4551	8.96484	11.4551	18.9258	8.96484
3.48633	3.48633	3.98438	3.98438	12.9492	16.9336	18.9258	21.416	12.4512	12.4512	7.4707	11.4551	8.96484	11.4551	18.9258	8.4668
3.48633	3.48633	3.98438	3.48633	12.9492	16.4355	18.9258	20.918	12.4512	11.9531	7.4707	11.4551	8.96484	11.4551	18.9258	8.4668
3.48633	3.48633	3.98438	3.48633	12.9492	16.4355	18.9258	20.918	12.4512	11.9531	7.4707	11.4551	8.4668	11.4551	18.9258	8.4668
3.48633	3.48633	3.98438	3.48633	12.9492	16.4355	18.4277	20.918	12.4512	11.9531	7.4707	11.4551	8.4668	11.4551	18.9258	8.4668
3.48633	3.48633	3.98438	3.48633	12.9492	16.4355	18.4277	20.918	12.4512	11.4551	7.4707	11.4551	8.4668	11.4551	18.9258	8.4668
3.48633	3.48633	3.98438	3.48633	12.9492	16.4355	18.4277	20.918	12.4512	11.4551	7.4707	11.4551	8.4668	11.4551	18.9258	8.4668
3.48633	3.48633	3.98438	3.48633	12.4512	16.4355	18.4277	20.918	11.9531	10.957	7.4707	11.4551	8.4668	11.4551	18.4277	7.96875
3.48633	3.48633	3.98438	3.48633	12.4512	16.4355	18.4277	20.4199	11.9531	10.957	7.4707	11.4551	8.4668	11.4551	18.4277	7.96875
3.48633	3.48633	3.98438	3.48633	12.4512	16.4355	18.4277	20.4199	11.9531	10.957	6.97266	11.4551	8.4668	10.957	18.4277	7.96875
2.98828	3.48633	3.48633	3.48633	12.4512	16.4355	18.4277	20.4199	11.9531	10.957	6.97266	11.4551	8.4668	10.957	18.4277	7.96875
2.98828	3.48633	3.48633	3.48633	12.4512	15.9375	18.4277	20.4199	11.9531	10.957	6.97266	10.957	8.4668	10.957	18.4277	7.96875
2.98828	3.48633	3.48633	3.48633	12.4512	15.9375	17.9297	20.4199	11.9531	10.957	6.97266	10.957	8.4668	10.957	18.4277	7.96875
2.98828	3.48633	3.48633	3.48633	12.4512	15.9375	17.9297	20.4199	11.9531	10.957	6.97266	10.957	8.4668	10.957	18.4277	7.96875
2.98828	3.48633	3.48633	3.48633	12.4512	15.9375	17.9297	20.4199	11.9531	10.459	6.97266	10.957	8.4668	10.957	17.9297	7.96875
2.98828	3.48633	3.48633	3.48633	12.4512	15.9375	17.9297	20.4199	11.9531	10.459	6.97266	10.957	8.4668	10.957	17.9297	7.96875
2.98828	3.48633	3.48633	3.48633	12.4512	15.9375	17.9297	19.9219	11.9531	10.459	6.97266	10.957	8.4668	10.957	17.9297	7.4707
2.98828	3.48633	3.48633	3.48633	12.4512	15.9375	17.9297	19.9219	11.9531	10.459	6.47461	10.957	8.4668	10.957	17.9297	7.4707
2.98828	3.48633	3.48633	3.48633	12.4512	15.9375	17.9297	19.9219	11.4551	10.459	6.47461	10.957	8.4668	10.957	17.9297	7.4707
2.98828	3.48633	3.48633	2.98828	12.4512	15.9375	17.9297	19.9219	11.4551	9.96094	6.47461	10.957	8.4668	10.957	17.9297	7.4707
2.98828	3.48633	3.48633	2.98828	12.4512	15.9375	17.9297	19.9219	11.4551	9.96094	6.47461	10.957	8.4668	10.957	17.9297	7.4707
2.98828	3.48633	3.48633	2.98828	11.9531	15.9375	17.9297	19.4238	11.4551	9.96094	6.47461	10.957	8.4668	10.957	17.4316	6.97266
2.98828	3.48633	3.48633	2.98828	11.9531	15.9375	17.4316	19.4238	11.4551	9.96094	6.47461	10.957	8.4668	10.957	17.4316	6.97266
2.98828	3.48633	3.48633	2.98828	11.9531	15.4395	17.4316	19.4238	11.4551	9.96094	6.47461	10.957	8.4668	10.957	17.4316	6.97266
2.98828	2.98828	3.48633	2.98828	11.9531	15.4395	17.4316	19.4238	11.4551	9.96094	6.47461	10.957	8.4668	10.957	16.9336	6.97266
2.98828	2.98828	3.48633	2.98828	11.9531	15.4395	17.4316	19.4238	11.4551	9.46289	6.47461	10.957	7.96875	10.957	16.9336	6.97266
2.98828	2.98828	3.48633	2.98828	11.9531	15.4395	17.4316	19.4238	11.4551	9.46289	6.47461	10.957	7.96875	10.957	16.9336	6.97266
2.98828	2.98828	3.48633	2.98828	11.9531	15.4395	17.4316	19.4238	11.4551	9.46289	5.97656	10.957	7.96875	10.957	16.9336	6.97266
2.98828	2.98828	3.48633	2.98828	11.9531	15.4395	17.4316	18.9258	11.4551	9.46289	5.97656	10.459	7.96875	10.459	16.9336	6.97266
2.49023	2.98828	3.48633	2.98828	11.9531	15.4395	17.4316	18.9258	10.957	9.46289	5.97656	10.459	7.96875	10.459	16.9336	6.97266
2.49023	2.98828	2.98828	2.98828	11.9531	15.4395	17.4316	18.9258	10.957	9.46289	5.97656	10.459	7.96875	10.459	16.9336	6.97266
2.49023	2.98828	2.98828	2.98828	11.9531	15.4395	16.9336	18.9258	10.957	9.46289	5.97656	10.459	7.96875	10.459	16.4355	6.97266
2.49023	2.98828	2.98828	2.98828	11.9531	15.4395	16.9336	18.9258	10.957	8.96484	5.97656	10.459	7.4707	9.96094	16.4355	6.47461
2.49023	2.98828	2.98828	2.49023	11.9531	14.9414	16.9336	18.9258	10.957	8.96484	5.97656	10.459	7.4707	9.96094	16.4355	6.47461
2.49023	2.98828	2.98828	2.49023	11.9531	14.9414	16.9336	18.9258	10.459	8.96484	5.97656	10.459	7.4707	9.96094	16.4355	6.47461
2.49023	2.98828	2.98828	2.49023	11.9531	14.9414	16.9336	18.4277	10.459	8.96484	5.97656	10.459	7.4707	9.96094	16.4355	6.47461
2.49023	2.98828	2.98828	2.49023	11.9531	14.9414	16.9336	18.4277	10.459	8.96484	5.47852	10.459	7.4707	9.96094	16.4355	6.47461
2.49023	2.98828	2.98828	2.49023	11.9531	14.9414	16.4355	17.9297	10.459	8.96484	5.47852	9.96094	7.4707	9.46289	15.9375	6.47461
2.49023	2.98828	2.98828	2.49023	11.9531	14.9414	16.4355	17.9297	10.459	8.96484	5.47852	9.96094	7.4707	9.46289	15.9375	6.47461
2.49023	2.98828	2.98828	2.49023	11.9531	14.4434	16.4355	17.9297	10.459	8.96484	5.47852	9.96094	7.4707	9.46289	15.9375	6.47461
2.49023	2.98828	2.98828	2.49023	11.9531	14.4434	16.4355	17.9297	10.459	8.96484	5.47852	9.96094	7.4707	9.46289	15.9375	6.47461
2.49023	2.98828	2.98828	2.49023	11.9531	14.4434	16.4355	17.9297	10.459	8.4668	4.98047	9.96094	7.4707	9.46289	15.9375	5.97656
2.49023	2.98828	2.98828	2.49023	11.9531	14.4434	16.4355	17.9297	10.459	8.4668	4.98047	9.96094	7.4707	9.46289	15.9375	5.97656
1.99219	2.98828	2.98828	2.49023	11.4551	14.4434	16.4355	17.9297	10.459	8.4668	4.98047	9.96094	7.4707	9.46289	15.9375	5.97656
1.99219	2.98828	2.98828	2.49023	11.4551	14.4434	16.4355	17.4316	9.96094	8.4668	4.98047	9.96094	6.97266	9.46289	15.9375	5.97656
1.99219	2.98828	2.98828	1.99219	11.4551	14.4434	16.4355	17.4316	9.96094	8.4668	4.98047	9.96094	6.97266	8.96484	15.9375	5.97656
1.99219	2.98828	2.98828	1.99219	11.4551	14.4434	16.4355	17.4316	9.96094	8.4668	4.98047	9.96094	6.97266	8.96484	15.9375	5.97656
1.99219	2.49023	2.98828	1.99219	11.4551	14.4434	16.4355	17.4316	9.96094	8.4668	4.98047	9.96094	6.47461	8.96484	15.4395	5.97656
1.99219	2.49023	2.98828	1.99219	11.4551	14.4434	16.4355	16.9336	9.96094	8.4668	4.98047	9.96094	6.47461	8.96484	15.4395	5.97656
1.99219	2.49023	2.98828	1.99219	11.4551	13.9453	15.9375	16.9336	9.96094	8.4668	4.98047	9.96094	6.47461	8.96484	15.4395	5.97656
1.99219	2.49023	2.98828	1.99219	11.4551	13.9453	15.9375	16.9336	9.96094	8.4668	4.48242	9.46289	6.47461	8.96484	15.4395	5.47852
1.99219	2.49023	2.98828	1.99219	11.4551	13.9453	15.9375	16.9336	9.46289	8.4668	4.48242	9.46289	6.47461	8.96484	15.4395	5.47852
1.99219	2.49023	2.98828	1.99219	11.4551	13.9453	15.9375	16.9336	9.46289	8.4668	4.48242	9.46289	6.47461	8.96484	15.4395	5.47852
1.99219	2.49023	2.49023	1.99219	11.4551	13.9453	15.9375	16.9336	9.46289	8.4668	4.48242	9.46289	6.47461	8.96484	14.9414	5.47852
1.99219	2.49023	2.49023	1.99219	11.4551	13.9453	15.9375	16.9336	9.46289	8.4668	4.48242	9.46289	6.47461	8.96484	14.9414	5.47852
1.99219	2.49023	2.49023	1.99219	11.4551	13.9453	15.9375	16.9336	9.46289	8.4668	4.48242	9.46289	6.47461	8.96484	14.9414	5.47852
1.99219	2.49023	2.49023	1.99219	11.4551	13.9453	15.9375	16.4355	9.46289	8.4668	4.48242	9.46289	6.47461	8.4668	14.4434	5.47852
1.99219	2.49023	2.49023	1.99219	11.4551	13.9453	15.9375	16.4355	8.96484	8.4668	4.48242	9.46289	5.97656	8.4668	14.4434	5.47852
1.99219	2.49023	2.49023	1.99219	11.4551	13.9453	15.9375	16.4355	8.96484	8.4668	4.48242	9.46289	5.97656	8.4668	14.4434	5.47852
1.99219	2.49023	2.49023	1.99219	11.4551	13.9453	15.9375	16.4355	8.96484	7.96875	4.48242	9.46289	5.97656	8.4668	14.4434	5.47852
1.99219	2.49023	2.49023	1.99219	11.4551	13.9453	15.9375	15.9375	8.4668	7.96875	4.48242	9.46289	5.97656	8.4668	14.4434	5.47852
1.99219	2.49023	2.49023	1.99219	11.4551	13.9453	15.9375	15.9375	8.4668	7.96875	4.48242	9.46289	5.97656	8.4668	14.4434	5.47852
1.99219	2.49023	2.49023	1.99219	11.4551	13.9453	15.9375	15.9375	8.4668	7.96875	4.48242	9.46289	5.97656	8.4668	14.4434	5.47852
1.99219	2.49023	2.49023	1.49414	11.4551	13.4473	15.9375	15.9375	8.4668	7.96875	4.48242	8.96484	5.97656	8.4668	14.4434	4.98047
1.99219	2.49023	2.49023	1.49414	11.4551	13.4473	15.4395	15.9375	8.4668	7.96875	3.98438	8.96484	5.97656	8.4668	13.9453	4.98047
1.99219	2.49023	2.49023	1.49414	11.4551	13.4473	15.4395	15.9375	8.4668	7.96875	3.98438	8.96484	5.97656	8.4668	13.9453	4.98047
1.99219	2.49023	2.49023	1.49414	11.4551	13.4473	15.4395	15.9375	8.4668	7.96875	3.98438	8.96484	5.97656	7.96875	13.9453	4.98047
1.99219	2.49023	2.49023	1.49414	10.957	13.4473	15.4395	15.9375	8.4668	7.96875	3.98438	8.96484	5.47852	7.96875	13.9453	4.98047
1.49414	2.49023	2.49023	1.49414	10.957	13.4473	15.4395	15.9375	7.96875	7.4707	3.98438	8.96484	5.47852	7.96875	13.9453	4.98047
1.49414	2.49023	2.49023	1.49414	10.957	13.4473	15.4395	15.4395	7.96875	7.4707	3.98438	8.96484	5.47852	7.96875	13.9453	4.98047
1.49414	2.49023	2.49023	1.49414	10.957	13.4473	15.4395	15.4395	7.96875	7.4707	3.98438	8.96484	5.47852	7.96875	13.9453	4.48242
1.49414	1.99219	2.49023	1.49414	10.957	13.4473	15.4395	15.4395	7.96875	7.4707	3.98438	8.96484	5.47852	7.96875	13.9453	4.48242
1.49414	1.99219	2.49023	1.49414	10.957	13.4473	15.4395	15.4395	7.96875	7.4707	3.98438	8.4668	5.47852	7.96875	13.9453	4.48242
1.49414	1.99219	2.49023	1.49414	10.957	13.4473	14.9414	15.4395	7.96875	7.4707	3.98438	8.4668	5.47852	7.96875	13.9453	4.48242
1.49414	1.99219	2.49023	1.49414	10.957	13.4473	14.9414	15.4395	7.96875	7.4707	3.98438	8.4668	5.47852	7.96875	13.9453	4.48242
1.49414	1.99219	2.49023	1.49414	10.957	13.4473	14.9414	15.4395	7.96875	7.4707	3.98438	8.4668	5.47852	7.96875	13.9453	4.48242
1.49414	1.99219	2.49023	1.49414	10.957	13.4473	14.9414	15.4395	7.96875	7.4707	3.98438	8.4668	5.47852	7.96875	13.4473	4.48242
1.49414	1.99219	2.49023	1.49414	10.957	13.4473	14.9414	15.4395	7.4707	7.4707	3.48633	8.4668	4.98047	7.96875	13.4473	4.48242
1.49414	1.99219	2.49023	1.49414	10.957	13.4473	14.4434	15.4395	7.4707	7.4707	3.48633	8.4668	4.98047	7.96875	13.4473	4.48242
1.49414	1.99219	2.49023	1.49414	10.957	13.4473	14.4434	15.4395	7.4707	7.4707	3.48633	8.4668	4.98047	7.96875	13.4473	3.98438
1.49414	1.99219	2.49023	1.49414	10.957	13.4473	14.4434	14.9414	7.4707	6.97266	3.48633	8.4668	4.98047	7.96875	13.4473	3.98438
1.49414	1.99219	2.49023	1.49414	10.957	13.4473	14.4434	14.9414	7.4707	6.97266	3.48633	8.4668	4.98047	7.96875	13.4473	3.98438
1.49414	1.99219	2.49023	1.49414	10.957	12.9492	14.4434	14.9414	6.97266	6.97266	3.48633	8.4668	4.98047	7.96875	13.4473	3.98438
1.49414	1.99219	2.49023	1.49414	10.957	12.9492	14.4434	14.9414	6.97266	6.97266	3.48633	8.4668	4.98047	7.4707	13.4473	3.98438
1.49414	1.99219	1.99219	1.49414	10.957	12.9492	13.9453	14.9414	6.97266	6.97266	3.48633	8.4668	4.98047	7.4707	13.4473	3.98438
1.49414	1.99219	1.99219	1.49414	10.459	12.9492	13.9453	14.9414	6.97266	6.97266	3.48633	8.4668	4.98047	7.4707	13.4473	3.98438
1.49414	1.99219	1.99219	1.49414	10.459	12.9492	13.9453	14.9414	6.97266	6.97266	3.48633	7.96875	4.98047	7.4707	13.4473	3.98438
1.49414	1.99219	1.99219	0.996094	10.459	12.9492	13.9453	14.9414	6.97266	6.97266	3.48633	7.96875	4.48242	7.4707	13.4473	3.98438
1.49414	1.99219	1.99219	0.996094	10.459	12.9492	13.9453	14.9414	6.97266	6.97266	3.48633	7.96875	4.48242	7.4707	13.4473	3.98438
1.49414	1.99219	1.99219	0.996094	10.459	12.9492	13.9453	14.9414	6.97266	6.97266	3.48633	7.96875	4.48242	7.4707	12.9492	3.98438
1.49414	1.99219	1.99219	0.996094	10.459	12.9492	13.9453	14.9414	6.97266	6.97266	2.98828	7.96875	4.48242	7.4707	12.9492	3.98438
1.49414	1.49414	1.99219	0.996094	10.459	12.9492	13.4473	14.9414	6.97266	6.97266	2.98828	7.96875	4.48242	7.4707	12.9492	3.98438
1.49414	1.49414	1.99219	0.996094	10.459	12.9492	13.4473	14.9414	6.97266	6.47461	2.98828	7.4707	4.48242	7.4707	12.9492	3.98438
1.49414	1.49414	1.99219	0.996094	10.459	12.9492	12.9492	14.9414	6.47461	6.47461	2.98828	7.4707	4.48242	7.4707	12.9492	3.48633
1.49414	1.49414	1.99219	0.996094	10.459	12.9492	12.9492	14.4434	6.47461	6.47461	2.98828	7.4707	4.48242	7.4707	12.9492	3.48633
0.996094	1.49414	1.99219	0.996094	10.459	12.9492	12.9492	14.4434	6.47461	6.47461	2.98828	7.4707	4.48242	7.4707	12.9492	3.48633
0.996094	1.49414	1.99219	0.996094	10.459	12.4512	12.9492	14.4434	6.47461	5.97656	2.98828	7.4707	4.48242	7.4707	12.9492	3.48633
0.996094	1.49414	1.99219	0.996094	10.459	12.4512	12.9492	14.4434	6.47461	5.97656	2.98828	7.4707	4.48242	7.4707	12.9492	3.48633
0.996094	1.49414	1.99219	0.996094	10.459	12.4512	12.4512	14.4434	6.47461	5.97656	2.49023	7.4707	4.48242	6.97266	12.9492	3.48633
0.996094	1.49414	1.99219	0.996094	10.459	12.4512	12.4512	14.4434	5.97656	5.97656	2.49023	7.4707	4.48242	6.97266	12.9492	3.48633
0.996094	1.49414	1.99219	0.996094	10.459	12.4512	12.4512	14.4434	5.97656	5.97656	2.49023	7.4707	4.48242	6.97266	12.4512	3.48633
0.996094	1.49414	1.99219	0.996094	10.459	12.4512	12.4512	14.4434	5.97656	5.97656	2.49023	7.4707	4.48242	6.97266	12.4512	3.48633
0.996094	1.49414	1.99219	0.996094	9.96094	12.4512	11.9531	14.4434	5.97656	5.97656	2.49023	6.97266	3.98438	6.97266	12.4512	3.48633
0.996094	1.49414	1.99219	0.996094	9.96094	12.4512	11.9531	14.4434	5.97656	5.97656	2.49023	6.97266	3.98438	6.97266	12.4512	3.48633
0.996094	1.49414	1.99219	0.996094	9.96094	12.4512	11.9531	14.4434	5.97656	5.97656	2.49023	6.97266	3.98438	6.97266	12.4512	3.48633
0.996094	1.49414	1.99219	0.996094	9.96094	12.4512	11.4551	14.4434	5.47852	5.97656	2.49023	6.97266	3.98438	6.97266	12.4512	3.48633
0.996094	1.49414	1.99219	0.996094	9.96094	12.4512	11.4551	13.9453	5.47852	5.47852	2.49023	6.97266	3.98438	6.97266	12.4512	3.48633
0.996094	1.49414	1.99219	0.996094	9.96094	12.4512	11.4551	13.9453	5.47852	5.47852	2.49023	6.97266	3.98438	6.47461	12.4512	3.48633
0.996094	1.49414	1.99219	0.996094	9.96094	12.4512	11.4551	13.9453	5.47852	5.47852	2.49023	6.97266	3.98438	6.47461	12.4512	3.48633
0.996094	1.49414	1.49414	0.996094	9.96094	12.4512	11.4551	13.9453	5.47852	5.47852	1.99219	6.97266	3.98438	6.47461	12.4512	2.98828
0.996094	1.49414	1.49414	0.996094	9.96094	12.4512	11.4551	13.9453	5.47852	5.47852	1.99219	6.97266	3.98438	6.47461	12.4512	2.98828
0.996094	0.996094	1.49414	0.996094	9.96094	11.9531	11.4551	13.4473	5.47852	5.47852	1.99219	6.97266	3.98438	6.47461	12.4512	2.98828
0.996094	0.996094	1.49414	0.996094	9.96094	11.9531	10.957	13.4473	5.47852	5.47852	1.99219	6.97266	3.48633	6.47461	12.4512	2.98828
0.996094	0.996094	1.49414	0.996094	9.96094	11.9531	10.957	13.4473	4.98047	5.47852	1.99219	6.97266	3.48633	6.47461	12.4512	2.98828
0.996094	0.996094	1.49414	0.996094	9.96094	11.9531	10.957	13.4473	4.98047	5.47852	1.99219	6.47461	3.48633	6.47461	11.9531	2.98828
0.996094	0.996094	1.49414	0.996094	9.96094	11.9531	10.957	13.4473	4.98047	5.47852	1.99219	6.47461	3.48633	6.47461	11.9531	2.98828
0.996094	0.996094	1.49414	0.996094	9.96094	11.9531	10.957	13.4473	4.98047	5.47852	1.99219	6.47461	3.48633	6.47461	11.9531	2.98828
0.996094	0.996094	1.49414	0.996094	9.96094	11.9531	10.459	13.4473	4.98047	5.47852	1.99219	6.47461	3.48633	6.47461	11.9531	2.98828
0.996094	0.996094	1.49414	0.996094	9.96094	11.9531	10.459	12.9492	4.98047	5.47852	1.99219	6.47461	3.48633	6.47461	11.9531	2.98828
0.996094	0.996094	1.49414	0.996094	9.96094	11.9531	10.459	12.9492	4.48242	5.47852	1.49414	6.47461	3.48633	6.47461	11.9531	2.98828
0.996094	0.996094	1.49414	0.996094	9.96094	11.9531	10.459	12.9492	4.48242	4.98047	1.49414	6.47461	3.48633	6.47461	11.9531	2.98828
0.996094	0.996094	1.49414	0.996094	9.96094	11.4551	9.96094	12.9492	4.48242	4.98047	1.49414	6.47461	3.48633	6.47461	11.9531	2.98828
0.996094	0.996094	1.49414	0.996094	9.96094	11.4551	9.96094	12.4512	4.48242	4.98047	1.49414	6.47461	3.48633	6.47461	11.4551	2.49023
0.996094	0.996094	1.49414	0.996094	9.46289	11.4551	9.46289	12.4512	4.48242	4.98047	1.49414	6.47461	2.98828	6.47461	11.4551	2.49023
0.996094	0.996094	1.49414	0.498047	9.46289	11.4551	9.46289	12.4512	4.48242	4.98047	1.49414	6.47461	2.98828	6.47461	11.4551	2.49023
0.996094	0.996094	1.49414	0.498047	9.46289	11.4551	9.46289	12.4512	4.48242	4.98047	1.49414	6.47461	2.98828	5.97656	11.4551	2.49023
0.996094	0.996094	1.49414	0.498047	9.46289	11.4551	9.46289	12.4512	4.48242	4.98047	1.49414	5.97656	2.98828	5.97656	11.4551	2.49023
0.996094	0.996094	1.49414	0.498047	9.46289	11.4551	9.46289	11.9531	4.48242	4.98047	1.49414	5.97656	2.98828	5.97656	11.4551	2.49023
0.996094	0.996094	1.49414	0.498047	9.46289	11.4551	8.96484	11.9531	4.48242	4.48242	1.49414	5.97656	2.98828	5.97656	11.4551	2.49023
0.996094	0.996094	1.49414	0.498047	9.46289	11.4551	8.96484	11.9531	3.98438	4.48242	1.49414	5.97656	2.98828	5.97656	11.4551	2.49023
0.996094	0.996094	1.49414	0.498047	9.46289	11.4551	8.96484	11.9531	3.98438	4.48242	0.996094	5.97656	2.98828	5.97656	11.4551	2.49023
0.996094	0.996094	1.49414	0.498047	9.46289	11.4551	8.96484	11.9531	3.98438	4.48242	0.996094	5.97656	2.98828	5.97656	11.4551	2.49023
0.996094	0.996094	1.49414	0.498047	9.46289	10.957	8.96484	11.9531	3.98438	4.48242	0.996094	5.97656	2.98828	5.97656	11.4551	2.49023
0.498047	0.996094	1.49414	0.498047	9.46289	10.957	8.96484	11.9531	3.98438	4.48242	0.996094	5.47852	2.49023	5.97656	11.4551	2.49023
0.498047	0.996094	1.49414	0.498047	9.46289	10.957	8.4668	11.4551	3.98438	4.48242	0.996094	5.47852	2.49023	5.97656	11.4551	2.49023
0.498047	0.996094	1.49414	0.498047	9.46289	10.957	8.4668	11.4551	3.48633	4.48242	0.996094	5.47852	2.49023	5.97656	11.4551	2.49023
0.498047	0.996094	1.49414	0.498047	9.46289	10.957	8.4668	11.4551	3.48633	4.48242	0.996094	5.47852	2.49023	5.97656	11.4551	2.49023
0.498047	0.996094	1.49414	0.498047	9.46289	10.957	8.4668	11.4551	3.48633	3.98438	0.996094	5.47852	2.49023	5.47852	11.4551	1.99219
0.498047	0.996094	0.996094	0.498047	9.46289	10.459	8.4668	10.957	3.48633	3.98438	0.996094	5.47852	2.49023	5.47852	10.957	1.99219
0.498047	0.996094	0.996094	0.498047	9.46289	10.459	8.4668	10.957	3.48633	3.98438	0.996094	5.47852	2.49023	5.47852	10.957	1.99219
0.498047	0.996094	0.996094	0.498047	8.96484	10.459	7.96875	10.957	3.48633	3.98438	0.996094	5.47852	2.49023	5.47852	10.957	1.99219
0.498047	0.996094	0.996094	0.498047	8.96484	10.459	7.96875	10.459	3.48633	3.98438	0.996094	5.47852	2.49023	5.47852	10.957	1.99219
0.498047	0.996094	0.996094	0.498047	8.96484	9.96094	7.96875	10.459	3.48633	3.98438	0.996094	5.47852	1.99219	5.47852	10.957	1.99219
0.498047	0.996094	0.996094	0.498047	8.96484	9.96094	7.96875	10.459	2.98828	3.98438	0.996094	5.47852	1.99219	5.47852	10.957	1.99219
0.498047	0.498047	0.996094	0.498047	8.96484	9.46289	7.96875	10.459	2.98828	3.98438	0.996094	5.47852	1.99219	5.47852	10.957	1.99219
0.498047	0.498047	0.996094	0.498047	8.96484	9.46289	7.96875	10.459	2.98828	3.48633	0.996094	5.47852	1.99219	5.47852	10.957	1.99219
0.498047	0.498047	0.996094	0.498047	8.96484	9.46289	7.4707	10.459	2.98828	3.48633	0.996094	5.47852	1.99219	5.47852	10.957	1.99219
0.498047	0.498047	0.996094	0.498047	8.96484	9.46289	7.4707	10.459	2.49023	3.48633	0.996094	4.98047	1.99219	5.47852	10.957	1.99219
0.498047	0.498047	0.996094	0.498047	8.96484	9.46289	7.4707	10.459	2.49023	3.48633	0.498047	4.98047	1.99219	5.47852	10.459	1.99219
0.498047	0.498047	0.996094	0.498047	8.96484	8.96484	7.4707	10.459	2.49023	3.48633	0.498047	4.98047	1.99219	5.47852	10.459	1.99219
0.498047	0.498047	0.996094	0.498047	8.96484	8.96484	7.4707	10.459	2.49023	3.48633	0.498047	4.98047	1.49414	5.47852	10.459	1.99219
0.498047	0.498047	0.996094	0.498047	8.96484	8.96484	6.97266	9.96094	2.49023	3.48633	0.498047	4.98047	1.49414	5.47852	10.459	1.99219
0.498047	0.498047	0.996094	0.498047	8.4668	8.96484	6.97266	9.96094	2.49023	3.48633	0.498047	4.98047	1.49414	4.98047	10.459	1.99219
0.498047	0.498047	0.996094	0.498047	8.4668	8.96484	6.97266	9.96094	2.49023	2.98828	0.498047	4.98047	1.49414	4.98047	10.459	1.99219
0.498047	0.498047	0.996094	0.498047	8.4668	8.96484	6.97266	9.96094	2.49023	2.98828	0.498047	4.98047	1.49414	4.98047	10.459	1.99219
0.498047	0.498047	0.996094	0.498047	8.4668	8.96484	6.97266	9.96094	1.49414	2.98828	0.498047	4.98047	0.996094	4.98047	9.96094	1.49414
0.498047	0.498047	0.996094	0.498047	8.4668	8.4668	6.97266	9.96094	1.49414	2.98828	0.498047	4.98047	0.996094	4.98047	9.96094	1.49414
0.498047	0.498047	0.996094	0.498047	8.4668	8.4668	6.97266	9.96094	1.49414	2.98828	0.498047	4.48242	0.996094	4.98047	9.96094	1.49414
0.498047	0.498047	0.996094	0.498047	8.4668	8.4668	6.97266	9.46289	1.49414	2.98828	0.498047	4.48242	0.996094	4.98047	9.96094	1.49414
0.498047	0.498047	0.996094	0.498047	8.4668	8.4668	6.97266	9.46289	1.49414	2.98828	0.498047	4.48242	0.996094	4.98047	9.96094	1.49414
0.498047	0.498047	0.996094	0.498047	7.96875	8.4668	6.97266	9.46289	1.49414	2.49023	0.498047	4.48242	0.996094	4.48242	9.96094	1.49414
0.498047	0.498047	0.996094	0.498047	7.96875	8.4668	6.47461	9.46289	1.49414	2.49023	0.498047	4.48242	0.498047	4.48242	9.96094	1.49414
0.498047	0.498047	0.996094	0.498047	7.96875	8.4668	6.47461	9.46289	1.49414	2.49023	0.498047	4.48242	0.498047	4.48242	9.46289	1.49414
0.498047	0.498047	0.996094	0.498047	7.96875	8.4668	6.47461	9.46289	0.996094	2.49023	0.498047	4.48242	0.498047	4.48242	9.46289	1.49414
0.498047	0.498047	0.996094	0.498047	7.96875	8.4668	6.47461	9.46289	0.996094	2.49023	0.498047	4.48242	0.498047	4.48242	9.46289	1.49414
0.498047	0.498047	0.996094	0.498047	7.96875	8.4668	5.97656	9.46289	0.996094	1.99219	0.498047	4.48242	0.498047	4.48242	9.46289	1.49414
0.498047	0.498047	0.996094	0.498047	7.96875	7.96875	5.97656	9.46289	0.498047	1.99219		3.98438	0.498047	4.48242	9.46289	1.49414
0.498047	0.498047	0.996094		7.96875	7.96875	5.97656	9.46289	0.498047	1.99219		3.98438		4.48242	8.96484	1.49414
0.498047	0.498047	0.996094		7.96875	7.96875	5.97656	9.46289	0.498047	1.99219		3.98438		4.48242	8.96484	1.49414
0.498047	0.498047	0.996094		7.96875	7.96875	5.97656	8.96484	0.498047	1.99219		3.98438		3.98438	8.96484	1.49414
0.498047	0.498047	0.996094		7.96875	7.4707	5.97656	8.96484	0.498047	1.99219		3.98438		3.98438	8.96484	1.49414
0.498047	0.498047	0.996094		7.96875	7.4707	5.97656	8.96484	0.498047	1.99219		3.98438		3.98438	8.96484	1.49414
0.498047	0.498047	0.498047		7.96875	7.4707	5.97656	8.96484	0.498047	1.99219		3.98438		3.98438	8.96484	1.49414
0.498047	0.498047	0.498047		7.96875	7.4707	5.97656	8.96484	0.498047	1.49414		3.98438		3.98438	8.4668	0.996094
0.498047	0.498047	0.498047		7.96875	6.97266	5.97656	8.96484	0.498047	1.49414		3.48633		3.98438	8.4668	0.996094
0.498047	0.498047	0.498047		7.96875	6.97266	5.97656	8.96484	0.498047	1.49414		3.48633		3.98438	8.4668	0.996094
		0.498047		7.4707	6.97266	5.97656	8.96484		1.49414		3.48633		3.48633	8.4668	0.996094
		0.498047		7.4707	6.47461	5.97656	8.4668		1.49414		3.48633		3.48633	7.96875	0.996094
		0.498047		7.4707	6.47461	5.47852	8.4668		1.49414		3.48633		3.48633	7.96875	0.996094
		0.498047		7.4707	5.97656	5.47852	8.4668		1.49414		3.48633		3.48633	7.96875	0.996094
		0.498047		7.4707	5.97656	5.47852	8.4668		1.49414		3.48633		3.48633	7.96875	0.996094
		0.498047		7.4707	5.97656	5.47852	8.4668		1.49414		3.48633		3.48633	7.96875	0.996094
		0.498047		7.4707	5.97656	5.47852	8.4668		1.49414		3.48633		2.98828	7.96875	0.996094
		0.498047		7.4707	5.97656	5.47852	8.4668		1.49414		2.98828		2.98828	7.96875	0.996094
		0.498047		7.4707	5.97656	5.47852	7.96875		1.49414		2.98828		2.98828	7.96875	0.996094
		0.498047		7.4707	5.97656	5.47852	7.96875		0.996094		2.98828		2.98828	7.4707	0.996094
		0.498047		6.97266	5.47852	5.47852	7.96875		0.996094		2.98828		2.98828	7.4707	0.996094
		0.498047		6.97266	5.47852	5.47852	7.96875		0.996094		2.98828		2.49023	7.4707	0.996094
		0.498047		6.47461	5.47852	5.47852	7.96875		0.996094		2.98828		2.49023	7.4707	0.996094
		0.498047		6.47461	4.98047	4.98047	7.96875		0.996094		2.98828		2.49023	7.4707	0.996094
		0.498047		6.47461	4.98047	4.98047	7.96875		0.996094		2.98828		2.49023	7.4707	0.996094
		0.498047		6.47461	4.98047	4.98047	7.96875		0.996094		2.49023		2.49023	7.4707	0.996094
		0.498047		6.47461	4.98047	4.98047	7.4707		0.996094		2.49023		2.49023	7.4707	0.996094
		0.498047		6.47461	4.98047	4.48242	7.4707		0.996094		2.49023		2.49023	7.4707	0.996094
		0.498047		6.47461	4.48242	4.48242	7.4707		0.498047		2.49023		2.49023	7.4707	0.996094
		0.498047		5.97656	4.48242	4.48242	7.4707		0.498047		2.49023		2.49023	6.97266	0.996094
		0.498047		5.97656	4.48242	4.48242	7.4707		0.498047		2.49023		2.49023	6.97266	0.498047
		0.498047		5.97656	3.98438	4.48242	7.4707		0.498047		2.49023		1.99219	6.47461	0.498047
		0.498047		5.97656	3.98438	4.48242	7.4707		0.498047		2.49023		1.99219	6.47461	0.498047
		0.498047		5.97656	3.98438	4.48242	7.4707		0.498047		2.49023		1.99219	6.47461	0.498047
		0.498047		5.97656	2.98828	3.98438	6.97266		0.498047		2.49023		1.99219	6.47461	0.498047
		0.498047		5.97656	2.98828	3.98438	6.97266		0.498047		2.49023		1.99219	6.47461	0.498047
		0.498047		5.47852	2.98828	3.98438	6.97266		0.498047		2.49023		1.99219	5.97656	0.498047
		0.498047		5.47852	2.98828	3.98438	6.97266		0.498047		2.49023		1.99219	5.47852	0.498047
		0.498047		4.98047	2.49023	3.98438	6.97266		0.498047		2.49023		1.99219	5.47852	0.498047
		0.498047		4.98047	2.49023	3.98438	6.97266		0.498047		1.99219		1.99219	5.47852	0.498047
		0.498047		4.98047	2.49023	3.98438	6.97266		0.498047		1.99219		1.99219	5.47852	0.498047
		0.498047		4.98047	2.49023	3.98438	6.97266		0.498047		1.99219		1.99219	4.98047	0.498047
2.98828	2.98828		0.498047	4.98047	2.49023	3.98438	6.47461		0.498047		1.99219		1.99219	4.98047	0.498047
2.98828	2.98828		0.498047	4.98047	2.49023	3.98438	6.47461		0.498047		1.99219		1.99219	4.98047	0.498047
2.98828	2.98828		0.498047	4.98047	2.49023	3.98438	6.47461		0.498047		1.99219		1.49414	4.98047	0.498047
2.98828	2.98828		0.498047	4.48242	2.49023	3.98438	5.97656		0.498047		1.49414		1.49414	4.98047	0.498047
2.98828	2.98828		0.498047	4.48242	2.49023	3.98438	5.97656		0.498047		1.49414		1.49414	4.98047	0.498047
2.49023	2.98828		0.498047	4.48242	1.99219	3.98438	5.97656		0.498047		1.49414		1.49414	4.98047	0.498047
2.49023	2.98828		0.498047	4.48242	1.99219	3.98438	5.47852				1.49414		1.49414	4.98047	0.498047
2.49023	2.49023		0.498047	4.48242	1.99219	3.48633	5.47852				1.49414		1.49414	4.98047	0.498047
2.49023	2.49023		0.498047	4.48242	1.99219	3.48633	5.47852				1.49414		1.49414	4.48242	0.498047
2.49023	2.49023		0.498047	3.98438	1.49414	3.48633	4.98047				1.49414		1.49414	4.48242	0.498047
2.49023	2.49023		0.498047	3.98438	1.49414	3.48633	4.98047				1.49414		1.49414	4.48242	0.498047
2.49023	2.49023		0.498047	3.98438	1.49414	3.48633	4.98047				1.49414		1.49414	4.48242
2.49023	2.49023		0.498047	3.98438	0.996094	3.48633	4.98047				1.49414		1.49414	4.48242
2.49023	2.49023		0.498047	3.98438	0.996094	3.48633	4.98047				1.49414		1.49414	4.48242
2.49023	2.49023		0.498047	3.98438	0.996094	3.48633	4.98047				1.49414		1.49414	4.48242
1.99219	2.49023		0.498047	3.98438	0.996094	3.48633	4.48242				0.996094		1.49414	3.98438
1.99219	2.49023		0.498047	3.48633	0.996094	3.48633	4.48242				0.996094		1.49414	3.98438
1.99219	2.49023		0.498047	3.48633	0.498047	3.48633	4.48242				0.996094		0.996094	3.48633
1.99219	2.49023		0.498047	3.48633	0.498047	3.48633	4.48242				0.996094		0.996094	3.48633
1.99219	2.49023		0.498047	3.48633	0.498047	3.48633	4.48242				0.996094		0.996094	3.48633
1.99219	2.49023		0.498047	3.48633	0.498047	3.48633	4.48242				0.996094		0.996094	3.48633
1.99219	1.99219		0.498047	3.48633	0.498047	3.48633	3.98438				0.996094		0.996094	3.48633
1.99219	1.99219		0.498047	3.48633	0.498047	2.98828	3.98438				0.996094		0.996094	3.48633
1.99219	1.99219		0.498047	3.48633	0.498047	2.98828	3.98438				0.996094		0.996094	3.48633
1.49414	1.99219		0.498047	3.48633	0.498047	2.98828	3.98438				0.996094		0.996094	3.48633
1.49414	1.99219		0.498047	3.48633	0.498047	2.98828	3.48633				0.498047		0.996094	3.48633
1.49414	1.99219		0.498047	3.48633		2.98828	3.48633				0.498047		0.996094	3.48633
1.49414	1.99219		0.498047	2.98828		2.49023	3.48633				0.498047		0.498047	2.98828
1.49414	1.99219		0.498047	2.98828		2.49023	3.48633				0.498047		0.498047	2.98828
1.49414	1.99219		0.498047	2.98828		2.49023	3.48633				0.498047		0.498047	2.98828
1.49414	1.99219		0.498047	2.98828		2.49023	3.48633				0.498047		0.498047	2.98828
1.49414	1.99219		0.498047	2.98828		2.49023	3.48633				0.498047		0.498047	2.98828
1.49414	1.99219			2.98828		2.49023	2.98828				0.498047		0.498047	2.98828
0.996094	1.99219			2.98828		2.49023	2.98828				0.498047		0.498047	2.98828
0.996094	1.99219			2.49023		2.49023	2.98828				0.498047		0.498047	2.98828
0.996094	1.49414			2.49023		2.49023	2.98828				0.498047		0.498047	2.98828
0.996094	1.49414			2.49023		1.99219	2.98828				0.498047		0.498047	2.98828
0.996094	1.49414			2.49023		1.99219	2.98828				0.498047		0.498047	2.49023
0.996094	1.49414			2.49023		1.99219	2.49023						0.498047	2.49023
0.996094	1.49414			2.49023		1.99219	2.49023						0.498047	2.49023
0.498047	1.49414			2.49023		1.99219	2.49023						0.498047	2.49023
0.498047	1.49414			2.49023		1.99219	1.99219						0.498047	2.49023
0.498047	1.49414			2.49023		1.99219	1.99219						0.498047	2.49023
0.498047	1.49414			1.99219		1.99219	1.49414						0.498047	2.49023
0.498047	0.996094			1.99219		1.49414							0.498047	2.49023
0.498047	0.996094			1.99219		1.49414							0.498047	2.49023
0.498047	0.996094			1.99219		1.49414							0.498047	2.49023
0.498047	0.996094			1.99219		1.49414							0.498047	2.49023
0.498047	0.996094			1.99219		1.49414							0.498047	1.99219
0.498047	0.996094			1.99219		1.49414								1.99219
	0.996094			1.49414		0.996094								1.99219
	0.996094			1.49414		0.996094								1.99219
	0.996094			1.49414		0.996094								1.99219
	0.498047			0.996094		0.996094								1.99219
	0.498047			0.996094		0.996094								1.99219
	0.498047			0.996094		0.996094								1.99219
	0.498047			0.498047		0.996094								1.99219
	0.498047			0.498047		0.996094								1.99219
	0.498047			0.498047		0.996094								1.49414
	0.498047			0.498047		0.996094								1.49414
	0.498047			0.498047		0.996094								1.49414
	0.498047			0.498047		0.498047								1.49414
	0.498047			0.498047		0.498047								1.49414
	0.498047			0.498047										1.49414
	0.498047			0.498047										1.49414
	0.498047			0.498047										0.996094
	0.498047			0.498047										0.996094
	0.498047													0.996094
	0.498047													0.996094
	0.498047													0.996094
	0.498047													0.996094
	0.498047													0.996094
														0.996094
														0.996094
														0.996094
														0.498047
														0.498047
														0.498047
														0.498047
														0.498047
														0.498047
														0.498047
														0.498047
Figure2-figure supplement 1D
Trpm2+/+		Trpm2-/-
BSA	L+P	BSA	L+P
2	23	1	18
1	22	1	19
1	19	1	18
1	17	1	20
Figure2-figure supplement 1E
	Trpm2 +/+			Trpm2 -/-
BSA	3.55281	3.04538	3.29909	5.05283	3.61384	4.33333
LPS	155.867	237.985	196.926	206.986	267.562	237.274
PA	1426.16	1659.88	1543.02	478.473	630.062	554.268
Nigericin	1204.02	1678.81	1441.41	1203.12	1292.91	1448.02
ATP	407.671	346.645	377.158	577.18	611.893	594.536
LLOMe	2698.28	2253.83	2476.05	658.991	468.932	563.961
MSU	1572.39	2038.66	1805.53	400.137	438.948	419.543
