# Supplementary material for: ER-to-lysosome Ca2+ refilling followed by K+ efflux-coupled store-operated Ca2+ entry in inflammasome activation and metabolic inflammation
Source: eLife. 2024 Jul 2;12:RP87561. doi: 10.7554/eLife.87561 (PMC11219040; doi:10.7554/eLife.87561)
Supplement: Figure 2—source data 1. [file elife-87561-fig2-data1.xlsx]

## Sheet: Fig. 2a
Figure 2A
Fluo-3 left								Fura-right
Trpm2+/+			Trpm2-/-					Trpm2 +/+:BSA	Trpm2 +/+:L+P	Trpm2 -/-:BSA	Trpm2 -/-:L+P
BSA	LPS	L+P	BSA	LPS	L+P			58.3158	114.766	66.3755	34.9723
20.6689	16.9336	29.1357	15.9375	17.6806	18.6767			59.3434	110.735	69.6183	11.8952
20.1709	15.9375	28.6377	15.4395	17.4317	18.1787			67.4003	108.137	70.9769	38.2879
18.9258	15.1905	27.8906	14.6923	17.1826	18.1787			63.5839	122.791	61.8256	39.138
18.1788	14.4434	27.3926	13.4473	17.1826	17.9297			22.2994	112.579	62.3576	18.1848
17.9297	14.4434	27.1436	13.4473	16.4355	17.1826			38.7754	100.961	62.919	11.3902
16.9336	14.1944	26.6456	12.9492	16.1866	16.9336			24.474	108.398	67.9296	20.9943
16.1865	14.1944	26.6456	12.2021	16.1866	16.6846			34.797	92.6632	62.5213	24.7587
16.1865	14.1944	26.3965	12.2021	16.1866	16.4355			32.8483	108.71	62.9903	5.3847
15.4395	13.9453	26.1474	12.2021	15.6884	16.1866				92.9125
14.9414	13.4473	25.1514	11.7041	15.6884	15.6884
14.9414	13.4473	24.6533	11.7041	15.1905	15.1905
12.9492	13.1982	24.1553	11.455	15.1905	15.1905
12.9492	12.9492	24.1553	11.206	14.9414	14.9414
11.9532	12.9492	23.9062	11.206	14.6924	14.6924
11.4551	12.2021	23.6573	10.708	14.6924	14.4434
10.9571	12.2021	21.6651	10.708	14.4434	14.4434
10.4589	11.9532	21.416	10.708	14.4434	14.4434
10.2099	11.9532	21.167	10.459	14.4434	13.9453
10.2099	11.7041	20.918	10.459	14.1944	13.9453
10.2099	11.4551	20.6689	10.459	13.9453	13.6963
9.9609	11.4551	20.4199	10.2099	13.9453	13.6963
9.7119	11.4551	20.4199	9.96095	13.6963	13.4473
9.4629	11.206	20.1709	9.71195	13.6963	13.4473
9.4629	10.957	20.1709	9.71195	13.4473	13.1982
9.21385	10.957	19.9219	9.71195	13.4473	13.1982
8.71585	10.957	19.9219	9.21385	13.1982	12.9492
8.71585	10.708	19.9219	8.96485	12.9492	12.9492
8.4668	10.459	19.9219	8.96485	12.9492	12.7002
8.4668	10.2099	19.9219	8.4668	12.9492	12.7002
8.4668	9.96095	19.4238	8.4668	12.7002	12.7002
8.4668	9.71195	19.4238	8.4668	12.7002	12.4512
8.4668	9.71195	19.4238	8.4668	12.7002	12.4512
8.4668	9.21385	19.4238	8.4668	12.7002	12.4512
8.4668	9.21385	18.9258	8.2178	12.7002	12.4512
8.21775	9.21385	18.9258	7.96875	12.2021	12.2021
7.96875	8.96485	18.9258	7.96875	12.2021	11.7041
7.96875	8.96485	18.9258	7.96875	11.9531	11.7041
7.96875	8.96485	18.9258	7.96875	11.9531	11.7041
7.96875	8.96485	18.6767	7.96875	11.9531	11.7041
7.96875	8.96485	18.1787	7.96875	11.9531	11.7041
7.96875	8.71585	18.1787	7.96875	11.9531	11.455
7.96875	8.4668	18.1787	7.96875	11.4551	11.455
7.71975	8.4668	18.1787	7.71975	11.4551	11.206
7.47075	8.4668	17.9296	7.71975	11.206	11.206
7.47075	8.4668	17.9296	7.71975	11.206	10.9571
7.47075	8.4668	17.9296	7.4707	11.206	10.9571
7.47075	8.4668	17.6806	7.4707	11.206	10.9571
7.47075	7.96875	17.4317	7.22165	11.206	10.9571
7.47075	7.96875	17.4317	7.22165	10.957	10.9571
7.47075	7.96875	17.4317	7.22165	10.4589	10.708
7.47075	7.96875	16.9336	7.22165	10.4589	10.708
7.47075	7.96875	16.9336	7.22165	10.4589	10.4589
7.47075	7.96875	16.9336	7.22165	10.4589	10.4589
7.2217	7.7197	16.9336	7.22165	10.4589	10.2099
7.2217	7.7197	16.9336	7.22165	10.2099	10.2099
6.97265	7.7197	16.9336	6.97265	10.2099	10.2099
6.97265	7.7197	16.9336	6.97265	10.2099	10.2099
6.97265	7.4707	16.6846	6.72365	10.2099	10.2099
6.97265	7.2217	16.6846	6.72365	10.2099	10.2099
6.97265	7.2217	16.4355	6.72365	9.7119	9.96095
6.97265	7.2217	16.4355	6.72365	9.7119	9.96095
6.97265	7.2217	16.4355	6.72365	9.7119	9.71195
6.97265	7.2217	16.4355	6.72365	9.7119	9.4629
6.72365	7.2217	16.1865	6.72365	9.7119	9.4629
6.72365	7.2217	15.9375	6.72365	9.7119	9.4629
6.72365	7.2217	15.9375	6.72365	9.7119	9.4629
6.47465	6.97265	15.9375	6.47465	9.7119	9.4629
6.47465	6.97265	15.6885	6.47465	9.7119	9.4629
6.47465	6.7236	15.4395	6.2256	9.7119	9.21385
6.47465	6.7236	15.4395	6.2256	9.21385	8.96485
6.47465	6.7236	14.9414	6.2256	9.21385	8.96485
6.2256	6.7236	14.9414	6.2256	9.21385	8.96485
6.2256	6.7236	14.6924	6.2256	9.21385	8.96485
6.2256	6.7236	14.4434	6.2256	9.21385	8.7158
6.2256	6.7236	14.1944	6.2256	9.21385	8.7158
5.97655	6.7236	14.1944	6.2256	8.96485	8.7158
5.97655	6.4746	13.9453	5.9766	8.96485	8.4668
5.97655	6.4746	13.9453	5.9766	8.96485	8.4668
5.97655	6.4746	13.9453	5.9766	8.96485	8.4668
5.72755	6.4746	13.9453	5.9766	8.96485	8.4668
5.72755	6.4746	13.9453	5.9766	8.96485	8.4668
5.72755	6.4746	13.4473	5.72755	8.7158	8.21775
5.72755	6.2256	13.4473	5.72755	8.7158	8.21775
5.72755	6.2256	13.4473	5.72755	8.7158	8.21775
5.4785	6.2256	13.4473	5.72755	8.7158	7.96875
5.4785	6.2256	13.1982	5.4785	8.7158	7.71975
5.2295	5.9766	12.9492	5.4785	8.4668	7.71975
5.2295	5.9766	12.9492	5.4785	8.4668	7.71975
5.2295	5.9766	12.9492	5.4785	8.4668	7.71975
5.2295	5.9766	12.7002	5.4785	8.4668	7.4707
4.9805	5.9766	12.7002	5.4785	8.4668	7.4707
4.9805	5.9766	12.7002	5.4785	8.2178	7.2217
4.9805	5.72755	12.7002	5.4785	8.2178	7.2217
4.9805	5.72755	12.7002	5.4785	8.2178	6.97265
4.9805	5.72755	12.7002	5.4785	8.2178	6.97265
4.9805	5.72755	12.4512	5.2295	8.2178	6.97265
4.9805	5.4785	12.4512	5.2295	8.2178	6.97265
4.9805	5.4785	12.4512	5.2295	7.9688	6.97265
4.73145	5.4785	12.2021	5.2295	7.9688	6.97265
4.73145	5.4785	12.2021	5.2295	7.9688	6.97265
4.73145	5.4785	12.2021	5.2295	7.9688	6.72365
4.4824	5.2295	11.9531	5.2295	7.9688	6.4746
4.4824	5.2295	11.9531	5.2295	7.9688	6.4746
4.2334	5.2295	11.9531	5.2295	7.71975	6.4746
4.2334	5.2295	11.7041	5.2295	7.4707	6.4746
4.2334	5.2295	11.7041	5.2295	7.4707	6.4746
4.2334	5.2295	11.455	4.73145	7.4707	6.4746
4.2334	5.2295	11.455	4.73145	7.4707	6.4746
4.2334	5.2295	11.455	4.73145	7.4707	6.4746
4.2334	5.2295	11.455	4.73145	7.4707	6.22555
4.2334	5.2295	11.455	4.73145	7.4707	6.22555
4.2334	4.98045	11.206	4.73145	7.4707	6.22555
4.2334	4.98045	11.206	4.73145	6.9727	6.22555
4.2334	4.98045	11.206	4.73145	6.9727	6.22555
4.2334	4.73145	11.206	4.73145	6.9727	6.22555
4.2334	4.73145	11.206	4.73145	6.9727	6.22555
3.9844	4.73145	11.206	4.73145	6.9727	6.22555
3.73535	4.73145	10.9571	4.48245	6.9727	6.22555
3.73535	4.73145	10.9571	4.48245	6.72365	5.97655
3.73535	4.73145	10.708	4.48245	6.72365	5.97655
3.73535	4.73145	10.708	4.48245	6.72365	5.97655
3.73535	4.73145	10.708	4.48245	6.72365	5.97655
3.73535	4.73145	10.708	4.2334	6.47465	5.97655
3.73535	4.73145	10.708	4.2334	6.47465	5.97655
3.73535	4.73145	10.459	4.2334	6.47465	5.72755
3.4863	4.4824	10.2099	4.2334	6.47465	5.72755
3.4863	4.4824	10.2099	4.2334	6.2256	5.72755
3.2373	4.2334	10.2099	4.2334	6.2256	5.72755
3.2373	4.2334	10.2099	4.2334	6.2256	5.72755
3.2373	4.2334	10.2099	4.2334	5.97655	5.72755
3.2373	4.2334	10.2099	4.2334	5.97655	5.72755
3.2373	4.2334	10.2099	4.2334	5.97655	5.72755
3.2373	4.2334	10.2099	4.2334	5.97655	5.72755
3.2373	4.2334	9.9609	4.2334	5.97655	5.72755
3.2373	4.2334	9.7119	4.2334	5.97655	5.72755
3.2373	3.9844	9.7119	3.73535	5.97655	5.72755
3.2373	3.9844	9.7119	3.73535	5.97655	5.72755
3.2373	3.9844	9.7119	3.73535	5.72755	5.72755
3.2373	3.9844	9.7119	3.73535	5.72755	5.72755
3.2373	3.9844	9.7119	3.73535	5.47855	5.72755
3.2373	3.9844	9.7119	3.73535	5.47855	5.72755
2.73925	3.9844	9.7119	3.73535	5.47855	5.4785
2.73925	3.73535	9.46285	3.73535	5.47855	5.4785
2.73925	3.73535	9.21385	3.73535	5.2295	5.4785
2.73925	3.73535	9.21385	3.4863	5.2295	5.4785
2.73925	3.73535	9.21385	3.4863	5.2295	5.22945
2.73925	3.73535	9.21385	3.4863	5.2295	5.22945
2.73925	3.73535	9.21385	3.4863	5.2295	5.22945
2.4902	3.73535	8.96485	3.4863	5.2295	5.22945
2.4902	3.73535	8.96485	3.4863	5.2295	5.22945
2.4902	3.2373	8.96485	3.4863	5.2295	5.22945
2.4902	3.2373	8.71585	3.4863	5.2295	5.22945
2.2412	3.2373	8.71585	3.4863	5.2295	5.22945
2.2412	3.2373	8.71585	3.2373	4.9805	5.22945
2.2412	3.2373	8.71585	3.2373	4.73145	5.22945
2.2412	3.2373	8.71585	3.2373	4.73145	5.22945
2.2412	3.2373	8.4668	3.2373	4.73145	5.22945
1.9922	3.2373	8.4668	3.2373	4.73145	5.22945
1.9922	3.2373	8.4668	3.2373	4.73145	5.22945
1.9922	3.2373	8.4668	3.2373	4.73145	5.22945
1.9922	3.2373	8.4668	3.2373	4.73145	5.22945
1.9922	3.2373	8.4668	3.2373	4.4824	5.22945
1.9922	3.2373	8.4668	2.9883	4.4824	4.98045
1.74315	3.2373	8.4668	2.9883	4.4824	4.98045
1.4941	2.98825	8.2178	2.9883	4.4824	4.98045
1.4941	2.98825	8.2178	2.9883	4.4824	4.98045
1.4941	2.98825	7.96875	2.9883	4.4824	4.98045
1.4941	2.98825	7.96875	2.9883	4.4824	4.98045
1.4941	2.98825	7.96875	2.9883	4.4824	4.98045
1.4941	2.98825	7.96875	2.9883	4.4824	4.98045
1.4941	2.98825	7.96875	2.9883	3.9844	4.98045
1.4941	2.98825	7.96875	2.9883	3.9844	4.98045
1.4941	2.73925	7.96875	2.73925	3.9844	4.98045
1.4941	2.73925	7.7197	2.4902	3.9844	4.98045
1.4941	2.73925	7.4707	2.4902	3.9844	4.98045
1.2451	2.73925	7.4707	2.4902	3.9844	4.73145
1.2451	2.73925	7.4707	2.4902	3.9844	4.73145
1.2451	2.73925	7.4707	2.4902	3.9844	4.73145
1.2451	2.49025	7.4707	2.4902	3.73535	4.73145
1.2451	2.49025	7.4707	2.4902	3.73535	4.73145
1.2451	2.49025	7.2217	2.4902	3.73535	4.73145
1.2451	2.49025	6.9727	2.4902	3.73535	4.73145
1.2451	2.49025	6.9727	2.4902	3.4863	4.73145
0.9961	2.49025	6.9727	2.4902	3.4863	4.73145
0.9961	2.49025	6.9727	2.2412	3.4863	4.73145
0.9961	2.49025	6.9727	2.2412	3.4863	4.48245
0.9961	2.49025	6.9727	2.2412	3.4863	4.48245
0.9961	2.49025	6.9727	2.2412	3.4863	4.48245
0.9961	2.2412	6.9727	2.2412	3.4863	4.48245
0.9961	2.2412	6.9727	2.2412	3.4863	4.48245
0.9961	2.2412	6.9727	2.2412	3.4863	4.48245
0.9961	2.2412	6.72365	2.2412	3.4863	4.48245
0.9961	2.2412	6.72365	2.2412	3.2373	4.48245
0.9961	2.2412	6.72365	2.2412	2.9883	4.48245
0.9961	2.2412	6.4746	2.2412	2.9883	4.2334
0.9961	1.9922	6.4746	2.2412	2.9883	4.2334
0.9961	1.9922	6.2256	2.2412	2.9883	4.2334
0.9961	1.74315	6.2256	2.2412	2.9883	4.2334
0.9961	1.74315	6.2256	1.74315	2.9883	4.2334

## Sheet: Fig. 2b
Figure 2B
Trpm2+/+		Trpm2-/-
BSA	L+P	BSA	L+P
8.209	6.64115	11.5102	9.43255
12.1445	7.31147	9.24851	9.51598
13.7789	7.34084	9.60285	9.91008
8.41917	8.69105	9.24626	11.5796
10.6379	8.39888	10.8369	11.1284

## Sheet: Fig. 2c
Figure 2C
	Trpm2+/+				Trpm2-/-
BSA	0	0	0	0	0	0	0	0
PA	15.9125	12.9235	12.092	12.8993	11.3907	12.9305	10.4766	10.3424
LPS	28.7278	31.0998	26.4517	29.39	28.6888	30.6365	27.2413	30.6937
L+P	552.424	406.547	550.199	388.117	214.2	221.578	233.656	228.215

## Sheet: Fig. 2d
Figure 2D
Trpm2+/+: BSA	Trpm2+/+: L+P	Trpm2-/-: BSA	Trpm2-/-: L+P
0	0.8	0.166667	0.428571
0	0.5	0.142857	0.2
0.285714	0.5	0.333333	0.142857
0.111111	0.75	0.25	0.111111
	1	0.333333	0.142857
			0.2
			0.666667
