# Supplementary material for: ER-to-lysosome Ca2+ refilling followed by K+ efflux-coupled store-operated Ca2+ entry in inflammasome activation and metabolic inflammation
Source: eLife. 2024 Jul 2;12:RP87561. doi: 10.7554/eLife.87561 (PMC11219040; doi:10.7554/eLife.87561)
Supplement: Figure 3—figure supplement 1—source data 1. [file elife-87561-fig3-figsupp1-data1.xlsx]

## Sheet: Figure3-figure supplement 1
Figure3-figure supplement 1B,C
Agonist-induced TRPM2 current					Basal TRPM2 current
BSA	PA	LPS	L+P		BSA	PA	LPS	L+P
0.464446	1.48162	4.21436	0.274264		0.132127	-0.0343396	0.17664	0.267613
0.232258	3.38165	0.456468	2.11417		0.333867	2.3492	0.131655	0.227305
1.30891	2.02976	0.907235	0.130041		-0.00778478	-0.150376	0.0190779	0.26653
7.74571	5.08325	0.986731	1.86208		0.0882992	-1.26511	-0.301346	0.129135
0.738964					0.374372
	2.59398	0.542481	3.91522			1.99599	-0.00475765	0.0481253
14.6203	10.0881		8.93202		-0.0936681	2.34468		0.0161162
2.61734	1.14645	6.22801	3.14087		0.0302657	-0.0469245	5.29246	-0.114819
0.466117		9.20591			0.0502077		0.837338
2.69896	5.64662	2.00778	2.7304		0.668136	0.100577	-0.00693288	5.47784
2.97735	0.52734		0.914125		-0.999893	0.0017412		0.021928
0.796009		1.22591			0.327259		0.390836
5.91892		3.50834			-0.142305		0.0710533
0.578442					0.128463
3.60861					1.053
3.21069					0.556293
0.336246					0.523489
1.79925					0.251
Figure3-figure supplement 1D
Trpm2+/+: BSA	Trpm2+/+: L+P	Trpm2+/+: L+P+BafA1	Trpm2-/-: BSA	Trpm2-/-: L+P	Trpm2-/-: L+P+BafA1
9.62514	61.1912	7.15371	32.4176	29.0132	46.9131
38.9836	49.3093	15.0959	47.6089	26.1736	34.3801
48.5984	33.0127	32.5798	21.6088	47.6399	50.5403
47.6773	62.224	42.743	30.5117	39.6059	23.2113
11.962	57.4963	42.4787	16.1591	62.8603	54.7654
40.6206	70.1407	44.2028	31.5295	41.2207	39.3495
44.2336	65.0587	28.1023	45.1353	30.1231	44.2644
24.3537	95.9858	38.0517	42.5463	32.0454	40.9512
32.9044	33.1631	17.5731	48.8415	32.3996	9.40298
34.2052	45.0364	35.655	33.7049	22.3066
	38.4474	33.6748		31.9254
	37.8267	40.2169
	32.4897	47.497
	73.5319	11.899
	31.1101	35.2861
	59.1964	67.6056
	49.7526	8.91918
	59.3623
	51.1728
	61.0951
	42.0365
	71.5282
	51.6995
	40.1802
	46.8821
	35.0987
	55.1066
Figure3-figure supplement 1E
Weeks	Trpm2+/+:NCD					Trpm2-/-:NCD					Trpm2+/+:HFD								Trpm2-/-:HFD
0	19	20	17	17	18	16	17	16	19	20	20	23	20	20	21	20	22	21	21	21	22	23	22	22	21	20
1	19	21	19	18	19	17	18	17	21	21	24	27	24	22	23	23	24	24	25	24	24	25	23	25	23	21
2	20	23	20	19	20	19	19	17	23	22	26	29	26	27	26	26	28	27	28	27	28	27	26	27	26	25
3	20	25	21	19	21	19	21	18	24	23	29	31	27	29	28	29	29	30	31	30	31	31	29	31	30	30
4	22	25	24	19	23	19	19	19	26	24	31	35	30	34	32	30	31	33	34	32	35	34	31	36	32	34
5	24	26	24	19	24	19	20	20	26	26	34	34	32	36	35	33	35	34	37	36	36	38	35	37	35	37
6	24	25	24	19	24	19	20	21	26	25	36	39	34	40	38	37	41	40	41	40	41	42	40	41	40	40
7	25	26	26	18	25	18	20	23	27	26	40	41	37	43	42	40	43	43	43	41	42	42	42	41	42	44
8	26	27	26	19	25	19	21	23	28	26	45	43	39	45	44	43	44	45	45	43	43	44	43	44	43	45
Figure3-figure supplement 1F
Trpm2+/+:HFD	Trpm2-/-:HFD
39.3322	16.1836
15.1366	17.4043
30.2428	12.159
30.9627	12.2859
12.2859	16.1836
	21.4043
	12.159
	18.174
