# Supplementary material for: ER-to-lysosome Ca2+ refilling followed by K+ efflux-coupled store-operated Ca2+ entry in inflammasome activation and metabolic inflammation
Source: eLife. 2024 Jul 2;12:RP87561. doi: 10.7554/eLife.87561 (PMC11219040; doi:10.7554/eLife.87561)
Supplement: Figure 3—source data 1. [file elife-87561-fig3-data1.xlsx]

## Sheet: Fig. 3a
Figure 3A
Weeks	Trpm2+/+: NCD					Trpm2-/-: NCD					Trpm2+/+: HFD								Trpm2-/-: HFD
0	147	186	193	166	186	164	163	159	149	134	168	227	190	206	198	252	180	201	194	167	156	226	216	164	189	176
1	147	169	157	159	149	149	170	164	140	158	196	242	183	172	198	179	189	216	184	164	172	215	205	199	224	210
2	147	140	157	160	153	152	137	169	188	163	191	192	203	210	199	180	192	218	163	171	224	207	206	195	225	213
3	185	153	166	162	162	167	177	168	172	160	190	192	190	209	195	185	195	220	174	175	169	196	208	190	223	212
4	154	177	168	154	143	149	166	153	123	131	197	215	199	186	199	191	202	214	163	159	157	199	175	193	220	214
5	142	167	166	154	141	149	157	171	168	150	186	227	187	185	196	195	212	218	194	181	171	162	176	192	198	198
6	141	170	169	162	141	153	192	168	166	188	193	198	210	215	204	201	208	221	163	179	214	184	174	191	203	198
7	177	198	155	159	143	208	192	165	147	154	218	238	194	218	217	210	213	218	162	191	136	233	188	192	198	199
8	182	201	161	176	206	141	153	170	187	151	230	240	191	220	190	205	225	224	170	200	160	230	198	194	201	200

## Sheet: Fig. 3b
Figure 3B
left
Time (min)	Trpm2+/+:HFD								Trpm2-/-:HFD								Trpm2+/+:NCD								Trpm2-/-:NCD
0	217	285.5	220	211.75	154	169	200	183	240.5	253.5	253.5	89	91	192	172	185	115	90	103	95	115	90	103	95	90	66	88	91	90	66	88	91
15	497.5	503.5	524.5	381.75	448	358	384	405	456.5	477.167	477.167	272	270	317	366	377	272	270	271	280	272	270	271	280	270	278	227	226	270	278	227	226
30	492	444	588	381.25	589	364	504	459	372	472.333	472.333	340	295	357	258	367	334	329	332	290	334	329	332	290	329	329	271	287	329	329	271	287
60	363	421	405	476.5	545	280	332	380	354	390.333	390.333	266	203	295	215	302	330	248	289	261	330	248	289	261	248	287	263	268	248	287	263	268
120	438	354	294	278.25	301	176	193	202	225	215	215	146	134	190	184	187	235	204	220	190	235	204	220	190	204	147	162	176	204	147	162	176
180	365	325	337	290	176	162	206	189	139	159.333	159.333	127	103	185	143	145	161	117	139	120	161	117	139	120	117	103	121	116	117	103	121	116
right
Trpm2+/+:NCD	Trpm2-/-:NCD	Trpm2+/+:HFD	Trpm2-/-:HFD
1309	1155	2082	1597
1155	1126	2028	1761
1233	1028	2090	1761
1129	1061	1769	1132
1309	1155	2048	999
1155	1126	1344	1348
1233	1028	1616	1181
1129	1061	1632	1398

## Sheet: Fig. 3c
Figure 3C
Trpm2+/+:HFD	Trpm2-/-:HFD
21	4
13	2
18	3
15	3
23	8
10	12
14	8
11	13

## Sheet: Fig. 3d
Figure 3D
Trpm2+/+:HFD	Trpm2-/-:HFD
0.5	0
0.333333	0.25
0.5	0.4
0.125	0
0.444444	0
0.3125	0.133333
0.0833333	0.153846
