# Supplementary material for: ER-to-lysosome Ca2+ refilling followed by K+ efflux-coupled store-operated Ca2+ entry in inflammasome activation and metabolic inflammation
Source: eLife. 2024 Jul 2;12:RP87561. doi: 10.7554/eLife.87561 (PMC11219040; doi:10.7554/eLife.87561)
Supplement: Figure 4—figure supplement 1—source data 1. [file elife-87561-fig4-figsupp1-data1.xlsx]

## Sheet: Figure4-figure supplement 1
Figure4-figure supplement 1A
	Vehicle				EGTA 3 mM
BSA	7.7709	6.74307	9.83528	7.71072	18.948	14.0884	110.142	15.5749
LPS	241.334	307.806	355.172	298.351	389.943	466.536	405.148	503.006
L+P	964.747	939.378	1394.19	1596.02	697.989	895.557	747.966	880.647
Figure4-figure supplement 1B
	DMSO				2-APB 100 nM
BSA	0	0	0	0	0	0	0	0
PA	13.6794	36.207	10.1892	37.7734	0	0	0	0
LPS	142.029	153.793	134.291	157.463	0	80.4593	88.1266	77.8503
L+P	754.984	821.629	762.879	777.92	88.619	294.716	318.337	296.059
Figure4-figure supplement 1C
	DMSO			BTP2 10 μM
BSA	0	10.4483	5.22414	0	0	0
PA	0	0	0	0	0	0
LPS	125.966	53.9655	89.9655	0	0	0
L+P	561.828	591.31	576.569	82.7241	152.828	117.776
Figure4-figure supplement 1D
BSA	L+P	L+P:BTP2
6.68159	7.09041	5.90705
5.98858	7.45137	5.80747
7.23444	8.91877	4.90381
8.28984	9.25802	5.00925
7.66658	11.2429	5.56919
11.8704	11.3583	5.44764
11.2971	10.983	7.09581
12.4661	10.5057	10.1617
11.1076	9.71608	7.15389
11.5878	10.7658	6.32833
11.8855	10.9324	6.72856
7.83984	13.6833	5.73566
8.22014	9.52127	5.29389
14.7483	9.51079	4.5416
11.075	7.63409	4.92675
10.5323	11.3901	7.56099
11.2418		8.94355
13.0465		8.54846
11.6963		5.63151
		5.76806
		6.22312
		5.13769
		6.67269
		7.06977
