# Supplementary material for: ER-to-lysosome Ca2+ refilling followed by K+ efflux-coupled store-operated Ca2+ entry in inflammasome activation and metabolic inflammation
Source: eLife. 2024 Jul 2;12:RP87561. doi: 10.7554/eLife.87561 (PMC11219040; doi:10.7554/eLife.87561)
Supplement: Figure 4—source data 1. [file elife-87561-fig4-data1.xlsx]

## Sheet: Fig. 4a
Figure 4A
GEM-CEIPIA1er left						D1ER right
BSA	L+P					BSA	L+P
6.86247	5.05691					0.633456	0.590691
5.92079	2.48382					0.604568	0.548186
4.63463	5.24582					0.648268	0.453523
2.85044	4.18281					0.598579	0.49332
4.99434	2.30227					0.606236	0.466594
7.49433	3.07741					0.570662	0.514291
7.04013	3.69678					0.522517	0.371094
7.38568	2.91193					0.711345	0.381702
10.0327	4.14461					0.76194	0.701199
2.25036	4.88541					0.877562	0.568954
4.51081	5.05813					0.677817	0.612357
3.36953	8.44119					0.658315	0.907018
8.29931	4.63204					0.674293	0.929307
7.37431	5.36489					0.627928	0.768281
10.0927	4.75798					0.553623	0.599862
4.80559	2.7806					0.53784	0.736224
6.29054	4.09967					0.620979	0.652636
6.92925	4.64012					0.602362	0.342238
8.30458	4.93554					0.614405	0.335125
6.53951	9.58191					0.559433	0.544219
6.3892	3.91634					0.668241	0.455172
5.58845	5.12083					0.412113	0.516548
5.20516	5.48836					0.368239	0.636223
4.93762	4.74019					0.489003	0.628754
3.11421	2.36817					0.658741	0.314707
3.56038						0.663938	0.301119
						0.648291	0.298753
						0.634384	0.676993
						0.454622	0.640475
						0.462745	0.657639
						0.589689	0.651263
						0.605816	0.512707
						0.806081	0.596488
						0.847186	0.562709
						0.356022	0.489622
						0.65942	0.544407
						0.698547	0.626948
						0.575242	0.670773
						0.557021	0.683613
						0.673366	0.666262
						0.654173	0.367526
						0.853867	0.382424
						0.832203	0.369636
						0.589161	0.444559
						0.527811	0.428326
						0.816583	0.576803
						0.848756	0.642177
						1.3061	0.603246
						0.897568	0.592812
						0.905783	0.662788

## Sheet: Fig. 4b
Figure 4B
BSA							L+P
Time	BAPTA	GEM					Time	BAPTA	GEM
0	10.423	0.0391238					0	10.894	0.0468862
8.9	10.185	0.0392926					8.9	10.816	0.0447519
17.96	10.318	0.0383717					17.96	10.914	0.0460029
27	10.207	0.0386206					27	10.883	0.0461367
44.93	10.374	0.0390051					44.93	10.888	0.0456665
53.8	10.175	0.0382516					53.8	10.882	0.0463866
62.68	10.157	0.0389371					62.68	11.004	0.044168
71.59	10.166	0.0399836					71.59	10.777	0.0479566
80.59	10.064	0.0383083					80.59	10.646	0.0442818
90.53	10.265	0.038828					90.53	10.846	0.0449881
99.5	10.22	0.0386387					99.5	10.708	0.0457554
108.36	10.284	0.0375883					108.36	10.805	0.045097
117.23	10.235	0.0380267					117.23	10.873	0.0457335
126.09	10.373	0.0384886					126.09	10.977	0.0464128
134.97	10.402	0.0381645					134.97	10.902	0.044699
143.84	10.448	0.0388366					143.84	10.531	0.0461702
152.7	10.768	0.0380381					152.7	10.733	0.0442805
161.58	10.5	0.037372					161.58	11.277	0.0444049
170.44	10.547	0.0385755					170.44	11.397	0.0449511
180.08	10.744	0.0379198					180.08	11.333	0.0456963
188.91	10.896	0.038475					188.91	11.461	0.0448375
197.77	11.132	0.0395837					197.77	11.506	0.0445555
206.63	11.272	0.0390158					206.63	11.498	0.0446674
215.5	11.118	0.0391087					215.5	11.425	0.0450923
224.38	11.24	0.038844					224.38	11.501	0.0456466
233.25	11.316	0.0381627					233.25	11.599	0.0460026
242.11	11.085	0.0385159					242.11	11.588	0.0441271
250.96	11.228	0.0387758					250.96	11.75	0.045788
259.85	11.107	0.0384351					259.85	11.763	0.0451702
269.77	11.078	0.0386375					269.77	11.848	0.0427131
278.64	10.834	0.0379787					278.64	11.637	0.045267
287.58	11.132	0.0382878					287.58	11.748	0.0443735
296.44	10.859	0.0384025					296.44	11.994	0.0451444
305.3	10.913	0.0369575					305.3	12.108	0.0451808
314.16	10.887	0.0381861					314.16	12.05	0.0441724
323.03	11.016	0.0383033					323.03	12.419	0.0443843
331.9	10.976	0.0379437					331.9	12.481	0.0434329
340.77	11.086	0.0379649					340.77	12.438	0.046067
349.76	10.967	0.0377368					349.76	12.384	0.0440161
359.47	11.14	0.0374605					359.47	12.343	0.0433358
368.36	10.962	0.0383485					368.36	12.624	0.0438159
377.26	11.035	0.0376302					377.26	12.28	0.0430916
386.16	10.958	0.0374705					386.16	12.364	0.0444113
395.02	10.989	0.0378206					395.02	12.67	0.0449954
403.88	10.94	0.037803					403.88	12.808	0.0455534
412.77	10.901	0.0375264					412.77	12.812	0.0441594
421.61	10.83	0.037458					421.61	12.937	0.043044
430.5	10.921	0.0374958					430.5	12.947	0.0445109
439.47	10.796	0.0370868					439.47	12.896	0.0423236
449.18	10.958	0.03652					449.18	12.564	0.0443429
458.04	10.77	0.0360043					458.04	13.022	0.0426188
466.92	10.8	0.0374529					466.92	12.863	0.0438997
475.97	10.995	0.0368672					475.97	12.65	0.0426774
484.85	10.471	0.0368277					484.85	12.82	0.0437513
493.74	10.701	0.0364444					493.74	13.109	0.0430225
502.6	10.563	0.0372104					502.6	12.788	0.0433203
511.47	10.74	0.0373131					511.47	13.025	0.0435935
520.32	10.637	0.0380031					520.32	13.269	0.0432208
529.19	10.757	0.0373183					529.19	13.5	0.043855
538.37	10.683	0.0362865					538.37	13.582	0.0433012
547.26	10.673	0.0381807					547.26	13.674	0.0433346
556.12	10.655	0.0378129					556.12	13.864	0.0427151
565.01	10.845	0.0370453					565.01	13.611	0.0427705
573.87	10.688	0.0369744					573.87	13.451	0.0424548
582.75	10.747	0.0382605					582.75	13.512	0.0429373
591.76	10.44	0.0367394					591.76	13.597	0.0423185
600.76	10.501	0.0378327					600.76	13.68	0.0422649
609.62	10.546	0.037818					609.62	12.899	0.0430385
618.48	10.504	0.0364756					618.48	13	0.0432725
627.56	10.614	0.0372968					627.56	13.074	0.0423911
636.55	10.81	0.0374033					636.55	13.471	0.0415746
645.41	10.657	0.0369418					645.41	13.454	0.0427907
654.28	10.647	0.0360403					654.28	13.582	0.0434063
663.15	10.731	0.0371892					663.15	13.47	0.0426427
672	10.859	0.035747					672	13.257	0.041946
680.87	10.676	0.0366208					680.87	13.679	0.0426707
689.73	10.756	0.0366944					689.73	13.807	0.0417924
698.61	10.619	0.0360812					698.61	13.602	0.042802
707.45	10.686	0.0357653					707.45	13.684	0.0419761
717.06	10.922	0.0370858					717.06	13.436	0.0418919
726.05	10.786	0.0358343					726.05	14.049	0.0430717
734.92	10.788	0.0362605					734.92	13.845	0.0425353
743.78	10.824	0.0361517					743.78	13.958	0.0422955
752.94	10.68	0.0356945					752.94	14.047	0.0419795
761.8	10.816	0.0371286					761.8	13.972	0.0422893
770.84	10.839	0.0375728					770.84	13.954	0.0408318
779.71	10.981	0.0368994					779.71	14.379	0.0414858
788.58	11.045	0.0359133					788.58	14.393	0.040685
797.44	10.972	0.0356216					797.44	14.314	0.041753
806.51	11.176	0.0362704					806.51	14.148	0.039907
815.36	11.384	0.0371651					815.36	14.437	0.0396302
824.23	11.36	0.0352609					824.23	14.511	0.0403677
833.09	11.157	0.035801					833.09	14.613	0.0408306
841.95	11.539	0.0365168					841.95	14.882	0.0416686
850.81	11.534	0.0355003					850.81	14.932	0.0422771
859.69	11.225	0.0361473					859.69	14.877	0.0398924
868.55	11.363	0.036032					868.55	14.876	0.0412889
877.6	11.4	0.0356455					877.6	14.984	0.0413744
886.51	11.204	0.0357777					886.51	14.754	0.042567
895.57	11.096	0.0366469					895.57	14.694	0.0412102
904.44	11.459	0.0359741					904.44	14.61	0.0406219
913.32	11.315	0.036195					913.32	14.429	0.0403425
922.25	11.015	0.0360746					922.25	14.547	0.0403725
931.14	10.832	0.0367957					931.14	14.761	0.0423956
940	10.896	0.0357783					940	14.462	0.0408517
948.86	10.728	0.0354464					948.86	14.501	0.0394268
957.71	10.962	0.0359049					957.71	14.579	0.0421701
966.57	10.828	0.036286					966.57	14.594	0.0415415
975.46	10.884	0.036635					975.46	14.989	0.0393897
984.66	10.864	0.0357189					984.66	15.07	0.0403939
993.51	10.674	0.0362115					993.51	14.857	0.0435731
1002.4	10.927	0.0362518					1002.4	15.054	0.0403197
1011.26	11.062	0.0355852					1011.26	15.205	0.0405223
1020.13	10.988	0.035546					1020.13	15.347	0.0396258
1028.99	10.996	0.0361989					1028.99	15.153	0.0386172
1037.87	11.12	0.0353347					1037.87	15.141	0.0385838
1046.74	11.028	0.0358948					1046.74	15.234	0.0386679
1055.57	11.036	0.0358199					1055.57	15.353	0.0389135
1064.46	10.892	0.0350361					1064.46	15.004	0.0397643
1074.09	10.957	0.035061					1074.09	15.446	0.0380461
1082.95	10.572	0.0353667					1082.95	15.3	0.0379705
1091.81	10.731	0.0349465					1091.81	15.119	0.0379049
1100.69	10.56	0.0347325					1100.69	15.497	0.0385091
1109.54	10.584	0.0342377					1109.54	15.377	0.0401343
1118.41	10.564	0.0347013					1118.41	15.405	0.039468
1127.27	10.674	0.0347904					1127.27	15.586	0.0390534
1136.15	10.781	0.0352605					1136.15	15.629	0.0393392
1145.01	10.56	0.0358818					1145.01	15.841	0.0394472
1153.9	10.688	0.0348832					1153.9	15.563	0.0387705
1163.48	10.628	0.0348355					1163.48	15.556	0.040449
1172.34	10.632	0.0345088					1172.34	15.804	0.03981
1181.22	10.811	0.0342788					1181.22	15.663	0.0389242
1190.08	10.513	0.0341571					1190.08	15.906	0.0385788
1198.93	10.494	0.0344358					1198.93	15.83	0.0401213
1207.81	10.695	0.0342919					1207.81	15.501	0.0396069
1216.68	10.871	0.0350117					1216.68	15.777	0.0393807
1225.57	10.667	0.0356937					1225.57	16.075	0.0393305
1234.43	10.741	0.0339195					1234.43	15.687	0.0381173
1243.32	10.555	0.0353981					1243.32	16.124	0.0372606
1252.49	10.606	0.0353928					1252.49	15.979	0.0394373

## Sheet: Fig. 4c
Figure 4C
		L+P:Recovery
BSA	L+P	L+P	L+P+Xesto C	L+P+Dan	L+P+TPEN
3.82494	3.61196	4.47604	3.2125	4.97485	2.02718
4.05717	3.70588	4.33277	3.75448	3.75661	2.23495
3.90328	3.92549	5.2243	3.98566	4.26764	1.77749
7.64988	2.26504	5.2623	3.35427	4.7732	1.70138
3.8359	3.73654	4.26254	3.4013	3.63406	1.86845
8.6284	2.94238	5.63628	1.72078		1.64936
4.63661	2.79611	4.07721			1.79397
4.00415	3.21399	5.20849			5.49188
4.52587		4.5172

## Sheet: Fig. 4d
Figure 4D
	DMSO				Xesto C
BSA	0	0	0	0	0	0	0	0
PA	13.6794	36.207	10.1892	37.7734	8.97538	7.2514	8.97538	7.2514
LPS	142.029	153.793	134.291	157.463	152.397	151.233	152.397	151.233
L+P	754.984	821.629	762.879	777.92	438.5	457.373	438.5	457.373

## Sheet: Fig. 4e
Figure 4E
BSA	LPS	PA	L+P
1.86207	4.06452	1.92857	19.6364
2.57143	3.27273	0.782609	9.31034
1.92857	5.625	4.64516	8.35714
0.692308	3.70588	4.15385	4.59574
0.782609	0.6	2.34783	4.09091
1	0.9	4.5
