# Supplementary material for: ER-to-lysosome Ca2+ refilling followed by K+ efflux-coupled store-operated Ca2+ entry in inflammasome activation and metabolic inflammation
Source: eLife. 2024 Jul 2;12:RP87561. doi: 10.7554/eLife.87561 (PMC11219040; doi:10.7554/eLife.87561)
Supplement: Figure 5—figure supplement 1—source data 1. [file elife-87561-fig5-figsupp1-data1.xlsx]

## Sheet: Figure5-figure supplement1
Figure5-figure supplement 1A
BSA	PA	LPS	L+P
50.0561	41.9721	46.3193	39.6782
51.8262	50.1974	45.3627	30.7892
59.1695		45.1514	29.0112
44.1427		49.3838	39.4747
Figure5-figure supplement 1B
	5.4 mM K+			60 mM K+
BSA	0	0	0	0	0	0
LPS	33.5786	35.4179	34.4982	9.13526	9.82262	9.47894
L+P	899.479	941.46	920.469	150.419	139.599	145.009
Figure5-figure supplement 1C
	DMSO			CTX			TRAM-34
BSA	0	0	0	0	0	0	0	0	0
PA	0	0	0	0	0	0	15.0526	19.9474	17.5
LPS	39.2632	33.8421	36.5526	23.6842	25	24.3421	0	0	0
L+P	320.421	321.211	320.816	106.684	112.579	109.632	173.316	173.158	173.237
Figure5-figure supplement 1D
	DMSO			TRAM-34			apamin			paxillin			qunine			barium sulfate			UCL 1684			4-AP
BSA	2.11073	2.12704	2.25973	2.46693	2.23382	2.18708	3.07519	2.30722	2.13029	1.74996	1.93482	1.97298	2.42274	2.81253	2.46558	2.01027	2.25252	2.11717	1.99871	2.1896	2.00616	2.30625	2.46384	2.06771
L+P	332.613	372.975	436.717	181.437	173.316	173.158	346.388	364.613	287.225	345.153	268.694	424.767	424.924	503.08	362.703	754.051	661.386	640.31	367.475	332.36	234.678	490.352	321.768	297.734
Figure5-figure supplement 1E
BSA	L+P	L+P:TRAM-34
6.68159	7.09041	6.6758
5.98858	7.45137	7.12961
7.23444	8.91877	5.83232
8.28984	9.25802	8.07236
7.66658	11.2429	7.51487
11.8704	11.3583	7.8737
11.2971	10.983	5.28236
12.4661	10.5057	6.16792
11.1076	9.71608	7.94487
11.5878	10.7658	4.7049
11.8855	10.9324	5.17096
7.83984	13.6833	5.9361
8.22014	9.52127	6.22225
14.7483	9.51079	7.06288
11.075	7.63409	4.82191
10.5323	11.3901	4.94838
