# Supplementary material for: ER-to-lysosome Ca2+ refilling followed by K+ efflux-coupled store-operated Ca2+ entry in inflammasome activation and metabolic inflammation
Source: eLife. 2024 Jul 2;12:RP87561. doi: 10.7554/eLife.87561 (PMC11219040; doi:10.7554/eLife.87561)
Supplement: Figure 5—source data 1. [file elife-87561-fig5-data1.xlsx]

## Sheet: Fig. 5a
Figure 5A
BSA	L+P:5.4 mM K+	L+P:60 mM K+
9.77503	11.1655	4.48273
9.36743	5.73674	4.54971
9.97241	5.68742	7.94861
10.0092	9.02961	5.91517
8.24138	7.09744	6.96194
11.5536	6.05265	6.48387
8.13332	6.22183	6.80688
9.58277	6.26012	9.01847
9.72531	6.18733	7.91543
10.7579	5.33067	7.68001
10.9825	6.01956	6.58039
8.35744	7.96289	6.58039
8.9106	9.94086	7.65409
9.43875	8.97229	8.91307
8.81742	8.4694	6.4861
9.80418	9.66284	5.04872
8.83521	9.45285	5.93595
10.3707	10.3115	6.60912
9.07751	14.1503	5.09671
9.93975	13.6977	5.06312
9.74291	13.5543	5.43431

## Sheet: Fig. 5b
Figure 5B
BSA	L+P	L+P:Recovery:5.4 mM K+	L+P:Recovery:60 mM K+
5.50751	3.8144	5.0816	4.50815
5.46951	3.82022	4.94521	4.32888
5.4704	3.33315	5.49684	4.62737
4.34632	2.23832	5.13919	4.03601
5.41539	3.79456	5.30235	3.13776
5.87584	3.59908	4.65212	4.88816
4.75226		4.87782

## Sheet: Fig. 5c
Figure 5C
BSA	L+P:5.4 mM K+	L+P: 60 mM K+
4.1753	9.05938	7.18796
5.98425	9.57962	6.63751
7.16612	8.56134	7.17558
5.94501	8.61097	7.79714
5.43141	8.74691	7.75061
6.2649	8.23318	6.0378
6.00957	11.2046
5.46328	10.3372
5.68816
6.12148
5.78213
6.37895
6.45917
6.92696

## Sheet: Fig. 5d
Figure 5D
Fluo-3 left						Fura right
BSA	L+P	L+P+TRAM-34				BSA	L+P	L+P+TRAM-34	L+P+BTP2
4.1753	9.05938	7.7653				8.31662	69.4746	33.145	21.2866
5.98425	9.57962	7.75231				25.7652	68.7248	26.6357	20.3684
7.16612	8.56134	7.23798				27.3654	63.4201	34.5129	35.28
5.94501	8.61097	8.31362				26.0315	64.3096	34.0484	33.8676
5.43141	8.74691	8.28507				23.3819	69.2202	28.6676	29.3292
6.2649	8.23318	8.96379				12.0594	64.5097	29.0013	27.7872
6.00957	11.2046	6.69088				27.6505	60.4485	32.3275	28.5069
5.46328	10.3372	7.95037				19.9888	59.4197	26.4224	25.5641
						23.0114	65.5566	33.8254	33.157
						23.1466	70.0427	30.745	25.3632
						17.2134	71.6397	25.6647	38.0274
						17.4919	65.2978	32.6039	31.206
						18.1424	67.5536	27.5733	28.7212

## Sheet: Fig. 5e
Figure 5E
LPS	L+P	L+P+BTP2	L+P+TRAM-34
2.47688	0.750225	3.72662	3.53502
3.05106	1.23822	2.82029	4.05439
2.30947	1.5041	3.12275	2.81682
3.52246	2.4208	3.59844	3.14848
3.06303	2.08225	2.98995	4.05439
