# Supplementary material for: ER-to-lysosome Ca2+ refilling followed by K+ efflux-coupled store-operated Ca2+ entry in inflammasome activation and metabolic inflammation
Source: eLife. 2024 Jul 2;12:RP87561. doi: 10.7554/eLife.87561 (PMC11219040; doi:10.7554/eLife.87561)
Supplement: Figure 6—figure supplement 1—source data 1. [file elife-87561-fig6-figsupp1-data1.xlsx]

## Sheet:    Fig. S6
Figure6-figure supplement 1A
BSA	PA	LPS	L+P
1	1.12983	1.08819	0.861102
1.1	1.1512	1.21984	1.06573
1	1.14051	1.15401	1.26341
Figure6-figure supplement 1C
TNF-α left								IL-6 right
	Kcnn4+/+			Kcnn4-/-					Kcnn4+/+			Kcnn4-/-
BSA	1395.38	1559.54	1414.55	923.212	295.374	1034.2		BSA	64.1638	63.7555	55.1524	33.5417	29.4763	28.5539
LPS	20836.3	23820	21390.4	16772.5	20031.7	17703.2		LPS	531.179	542.877	575.269	419.202	430.386	456.127
L+P	27963	29014.5	29654.5	32851.4	30948	32823.2		L+P	697.854	789.11	752.883	766.512	959.944	848.288
Figure6-figure supplement 1B
Kcnn4+/+			Kcnn4-/-
1	0.675369	0.737685	5.50272e-05	5.50272e-05	5.4e-05
Figure6-figure supplement 1D
		BAPTA-AM
BSA	L+P	BSA	L+P
0	0.115385	0.238095	0.151515
0.0909091	0.0833333	0.0526316	0.04
0.107143	0.05	0.0333333	0.344828
0	0.125	0.16	0.0476191
0.0833333	0.05	0	0.09375
0.0740741	0.0526316	0.125	0.1
0.037037	0.157895	0	0.0357143
0.0434783	0.285714	0.0384615	0.08
0.0454546	0.222222	0	0.238095
0.0588235	0.428571	0.130435	0.208333
	0.5		0.227273
	0.45		0.105263
	0.125		0.0769231
	0.357143		0.0909091
	0.142857		0.0555556
	0.4375		0
Figure6-figure supplement 1E
	Kcnn4+/+				Kcnn4-/-
BSA	235.312	117.989	346.276	233.192	106.265	228.578	133.216	156.02
LPS	920.619	920.619	988.061	943.1	310.748	747.303	370.214	476.088
PA	3541.01	3556.55	3700.62	3891.39	1753.2	1243.97	1816.59	1500.87
Nigericin	1459.45	2321.02	1099.95	1973.32	1283.03	1495.39	1145.04	1412.3
ATP	1705.29	1422.41	1469.2	1528.61	1263.27	1300.31	1449.97	1461.58
LLOMe	2196.01	3893.22	1753.78	2537.94	840.98	1194.34	856.408	1022.01
MSU	4463.19	2998.24	6301.25	3381.07	3470.64	2075.42	2715.11	1763.92
Figure6-figure supplement 1H left
Time	Kcnn4+/+:HFD																	Kcnn4-/-:HFD
0	160	168	154	159	121	153	119	163	156	183	174	169	145	129	90	174	169	137	148	142.5	121	139	108	186	185	167	111	95	115	102	95	146	143	159
15	280	303	263	316	268	422	345	381	405	358	318	383	305	268	190	318	383	301	331	316	273	175	262	353	367	340	241	251	177	154	241	253	404	226
30	406	344	346	456	315	457	372	443	426	441	378	402	316	320	315	378	402	312	307	309.5	307	262	213	393	364	448	387	349	229	269	257	288	393	252
60	305	254	347	350	252	367	317	387	357	422	251	375	246	275	303	251	375	258	224	241	218	236	135	328	326	413	325	322	208	254	195	279	344	225
120	180	167	160	181	160	201	169	197	213	250	212	236	157	160	138	212	236	159	140	149.5	129	156	100	182	191	235	172	157	141	126	130	160	145	147
180	183	184	178	174	164	158	152	178	161	187	164	192	105	106	91	164	192	164	136	150	146	170	97	176	166	190	125	83	106	112	96	121	93	75
Figure6-figure supplement 1H left
Kcnn4+/+:HFD	Kcnn4-/-:HFD
1343	1181
1244	1144
1282	1162
1470	1061
1138	983.5
1603	812.5
1339	1437
1579	1424
1560	1615
1656	1243
1328	1168
1577	865.5
1149	910
1141	918.5
1656	1114
1328	1404
1577	967
