# Supplementary material for: ER-to-lysosome Ca2+ refilling followed by K+ efflux-coupled store-operated Ca2+ entry in inflammasome activation and metabolic inflammation
Source: eLife. 2024 Jul 2;12:RP87561. doi: 10.7554/eLife.87561 (PMC11219040; doi:10.7554/eLife.87561)
Supplement: Figure 6—source data 1. [file elife-87561-fig6-data1.xlsx]

## Sheet: Fig. 6b 
Figure 6B
BSA	LPS	L+P
1.44	0.729	26.13
0.837913	0.4689	0.369
0.512	2.17	0.988
0.963	1.76	7.27
0.435	1.1	2.44
0.3521	2.45	4.33
0.423	0.8829	4.01
0.211	0.5234	3.76
0.435	0.293	4.08
0.3521	0.996	0.649
0.423	1.95	1.185
0.211	0.729	3.92
0.963	0.4689	3.5

## Sheet: Fig. 6d
Figure 6D
BSA	LPS	L+P
1.17	0.5	1.25
1.8	0.9	0.564
1.4	1.5	0.46
0.521	1.8	1.67
	1.4

## Sheet: Fig. 6e
Figure 6E
	Kcnn4+/+			Kcnn4-/-
BSA	4.2266	4.08192	4.15426	4.87725	5.1081	4.99268
PA	440.943	454.228	447.586	304.14	302.86	303.5
LPS	476.002	434.52	455.261	266.814	242.532	254.673
L+P	2122.1	1914.98	2018.54	882.96	872.517	877.739

## Sheet: Fig. 6f
Figure 6F
Kcnn4+/+: BSA	Kcnn4+/+: L+P	Kcnn4-/-: BSA	Kcnn4-/-: L+P
6.50428	3.76025	4.1269	8.88441
5.68262	4.63776	6.10807	8.61964
5.68262	4.60989	4.99624	6.89669
5.88651	3.79753	5.1689	6.37655
	3.82184	5.13247	5.05335

## Sheet: Fig. 6g
Figure 6G
BSA	L+P	L+P:(-)	L+P:TRAM-34
2.45036	2.05295	3.41881	2.13718
2.46163	2.66303	4.14619	2.70543
5.4219	2.64401	3.54989	3.42738
4.35514	2.90273	3.68574	2.00375
3.85095	2.88395	6.03241	1.96544
3.63118	1.9908	3.51233	2.46998
2.5615	2.13102		2.13434
4.80293	2.49598		1.73381
4.44592			2.19314
6.93425
5.83743

## Sheet: Fig. 6j
Figure 6J
KCNN4+/+: HFD	KCNN4-/-: HFD
0.31579	0.727273
0.3	0.230769
0.3	0.2
0.5	0.25
0.333333	0.5
0.666667	0.357143
1.25	0.538462
0.166667	0.625
0.4	0.714286
3	0.571429
0.666667	0.5
0.666667	0.263158
0.8	0.181818
0.4	0.1875
1.14286	0.636364
1	1
2.33333	0.125
0.555556	0.166667
0.5	0.416667
0.25	0.0967742
2.33333	0.166667
1.75	0.230769
0.153846
0.705882
0.6
0.571429
0.375
1.6

## Sheet: Fig. 6k
Figure 6K
KCNN4+/+: HFD	KCNN4-/-: HFD
17	1
5	2
5	2
7	2
5	2
6	3
4	1
4	2
7	1
7	1
4	2
6
