# Supplementary material for: ER-to-lysosome Ca2+ refilling followed by K+ efflux-coupled store-operated Ca2+ entry in inflammasome activation and metabolic inflammation
Source: eLife. 2024 Jul 2;12:RP87561. doi: 10.7554/eLife.87561 (PMC11219040; doi:10.7554/eLife.87561)
Supplement: Figure 7—figure supplement 1—source data 1. [file elife-87561-fig7-figsupp1-data1.xlsx]

## Sheet: Figure7-figure supplement 1
Figure7-figure supplement 1A left				Figure7-figure supplement 1A middle					Figure7-figure supplement 1A right
BSA	L+P:4 h	L+P:21 h		BSA	L+P:4 h	L+P:21 h			BSA	L+P:4 h	L+P:21 h
9.25666	10.5451	13.2741		17.924	21.0915	13.483			3.48918	2.49753	1.98986
7.93905	12.0357	13.7896		18.4157	20.6966	12.0474			3.377	2.15195	1.93732
8.83611	10.9208	13.6546		18.3902	15.2967	15.4727			2.91437	3.27748	3.36215
8.45748	11.0535	14.2942		19.332	16.1862	15.9929			2.71398	3.38919	2.0923
10.2576	10.4218	11.4319		16.6344	18.0755	12.377			4.56018	2.43722	2.00276
9.14886	9.71705	12.427		20.402	19.0269	17.5557			2.9072	3.00898	2.37575
7.03012	9.11449	12.4636		21.0697	17.9333	13.1295			3.25348	3.36869	2.10852
8.0293	10.3768	11.5194		19.2178	18.0518	14.6299			3.17372	3.52037	2.15858
9.51387	9.57482	11.4045		19.2328	20.7523	14.0968			3.46368	3.25258	1.79262
8.63622	9.68864	11.5478		17.1363	19.4474				2.98178	2.21039	1.72358
									3.07449	2.61005	3.16222
									2.93902	2.78667	2.94456
									3.06849	3.93295	1.95371
									3.40079	3.50049	2.23993
									3.22151	2.94997	2.35458
									2.69896	2.37753	2.523
									2.62664	3.10053	2.21786
									2.14923	3.43897	1.98411
									2.1567	2.92401	2.0523
									2.59831	3.13607	2.16483
									2.62348	2.63699	2.19603
									3.77927	3.50447	2.25465
									2.04705	3.58678	2.21252
									2.05488	2.73192	1.89591
									2.03167	2.71772	1.99664
									2.26512	2.84743	3.17495
									2.41131	2.61726	1.78919
									2.22045	3.11583	1.88914
									2.33419	2.59679	2.04247
									2.63758	3.17527	1.85917
									2.59157	2.24867	2.16983
									2.42048	2.32137	2.19324
									2.43251	2.54647	2.18398
									2.66757	2.55143	2.17482
									2.50439	2.25463	2.51443
									2.43451	2.185	2.26709
									2.27145	3.20252	2.23676
									2.32967	2.46716	1.76368
									2.7484	2.39958	1.71161
									2.79182	2.86069	2.0175
									2.41233	2.91939	1.95751
									2.16865	2.67534	1.99891
									2.30754	2.79945	2.09958
									2.47643	2.36554	1.65356
									2.14125	2.27497	2.3237
									2.01187	2.34612	2.05412
									2.0244	2.92149	2.15215
									2.18579	2.88512	1.88259
									2.00491	3.04909	1.77883
									1.89888	2.24802	1.79784
Figure7-figure supplement 1D left
	DMSO			oxozeaenol 50nM			oxozeaenol 100nM			oxozeaenol 200nM			oxozeaenol 500nM
BSA	6.2924	5.94009	6.59816	6.4138	8.03598	6.87214	5.1947	5.18456	5.5077	5.85705	5.88918	7.44289	11.2834	18.5355	12.6583
L+P	301.772	342.097	322.135	352.861	332.273	363.877	340.264	381.953	371.305	290.288	290.144	309.781	250.291	306.49	373.531
