# Supplementary material for: ER-to-lysosome Ca2+ refilling followed by K+ efflux-coupled store-operated Ca2+ entry in inflammasome activation and metabolic inflammation
Source: eLife. 2024 Jul 2;12:RP87561. doi: 10.7554/eLife.87561 (PMC11219040; doi:10.7554/eLife.87561)
Supplement: Figure 7—source data 1. [file elife-87561-fig7-data1.xlsx]

## Sheet: Fig. 7
Figure 7E
	DMSO			selonsertib			SP600125
BSA	0	0	0	10.1993	3.8524	4.11338	2.75602	2.74657	2.87475
L+P	517.551	582.074	549.813	54.1399	63.7285	54.7175	124.781	93.8588	128.281
Figure 7H
	DMSO			KN-93			KN-92
BSA	0	0	0	0	0	0	0	4.70207	0
LPS	88.5554	87.5205	88.038	50.4671	55.2427	52.8549	199.989	201.566	200.777
L+P	517.551	582.074	549.813	355.775	275.744	315.76	632.45	721.27	676.86
